# Supplementary material for: Analysis of non-respondent pregnant women who were registered in the Japan Environment and Children’s Study: a longitudinal cohort study
Source: PubMed Central journal article supplement — BMJ Open. 2019 Jun 27;9(6):e025562. doi: 10.1136/bmjopen-2018-025562 (PMC6597650; doi:10.1136/bmjopen-2018-025562), 2019-06-27
Supplement: bmjopen-2018-025562.draft_revisions.pdf [file bmjopen-2018-025562.draft_revisions.pdf]

# BMJ Open

BMJ Open is committed to open peer review. As part of this commitment we make the peer review history of every article we publish publicly available.

When an article is published we post the peer reviewers' comments and the authors' responses online. We also post the versions of the paper that were used during peer review. These are the versions that the peer review comments apply to.

The versions of the paper that follow are the versions that were submitted during the peer review process. They are not the versions of record or the final published versions. They should not be cited or distributed as the published version of this manuscript.

BMJ Open is an open access journal and the full, final, typeset and author-corrected version of record of the manuscript is available on our site with no access controls, subscription charges or pay-per-view fees (<http://bmjopen.bmj.com>).

If you have any questions on BMJ Open's open peer review process please email [info.bmjopen@bmj.com](mailto:info.bmjopen@bmj.com)

# BMJ Open

## Analysis of non-respondent pregnant women who were registered in the Japan Environment and Children's Study: a longitudinal cohort study

|                               |                                                                                                                                                                                                                                                                                                                                                                                                                                                                                                                                                                                                                                                                                                                                                                                                                                                                                                                                                                                                                                                                                                                                                                                                                                                                                                                                                                                                                                                                                                                                                                                                                                                                                                                           |
|-------------------------------|---------------------------------------------------------------------------------------------------------------------------------------------------------------------------------------------------------------------------------------------------------------------------------------------------------------------------------------------------------------------------------------------------------------------------------------------------------------------------------------------------------------------------------------------------------------------------------------------------------------------------------------------------------------------------------------------------------------------------------------------------------------------------------------------------------------------------------------------------------------------------------------------------------------------------------------------------------------------------------------------------------------------------------------------------------------------------------------------------------------------------------------------------------------------------------------------------------------------------------------------------------------------------------------------------------------------------------------------------------------------------------------------------------------------------------------------------------------------------------------------------------------------------------------------------------------------------------------------------------------------------------------------------------------------------------------------------------------------------|
| Journal:                      | <i>BMJ Open</i>                                                                                                                                                                                                                                                                                                                                                                                                                                                                                                                                                                                                                                                                                                                                                                                                                                                                                                                                                                                                                                                                                                                                                                                                                                                                                                                                                                                                                                                                                                                                                                                                                                                                                                           |
| Manuscript ID                 | bmjopen-2018-025562                                                                                                                                                                                                                                                                                                                                                                                                                                                                                                                                                                                                                                                                                                                                                                                                                                                                                                                                                                                                                                                                                                                                                                                                                                                                                                                                                                                                                                                                                                                                                                                                                                                                                                       |
| Article Type:                 | Research                                                                                                                                                                                                                                                                                                                                                                                                                                                                                                                                                                                                                                                                                                                                                                                                                                                                                                                                                                                                                                                                                                                                                                                                                                                                                                                                                                                                                                                                                                                                                                                                                                                                                                                  |
| Date Submitted by the Author: | 14-Aug-2018                                                                                                                                                                                                                                                                                                                                                                                                                                                                                                                                                                                                                                                                                                                                                                                                                                                                                                                                                                                                                                                                                                                                                                                                                                                                                                                                                                                                                                                                                                                                                                                                                                                                                                               |
| Complete List of Authors:     | <p>Kigawa, Mika; Kanagawa University of Human Services, Tsuchida, Akiko; University of Toyama Faculty of Medicine Graduate School of Medicine and Pharmaceutical Science for Education, Department of Public Health; University of Toyama Toyama Regional Center for JECS Miura, Kayoko; Kanazawa University Health Service Center Ito, Mika; University of Toyama Faculty of Medicine Graduate School of Medicine and Pharmaceutical Science for Education, Department of Obstetrics and Gynecology</p> <p>Tanaka, Tomomi; University of Toyama Toyama Regional Center for JECS; University of Toyama Faculty of Medicine Graduate School of Medicine and Pharmaceutical Science for Education, Department of Pediatrics</p> <p>Hamazaki, Kei; University of Toyama Faculty of Medicine Graduate School of Medicine and Pharmaceutical Science for Education, Department of Public Health; University of Toyama Toyama Regional Center for JECS</p> <p>Adachi, Yuichi; University of Toyama Faculty of Medicine Graduate School of Medicine and Pharmaceutical Science for Education, Department of Pediatrics</p> <p>Saito, Shigeru; University of Toyama Faculty of Medicine Graduate School of Medicine and Pharmaceutical Science for Education, Department of Obstetrics and Gynecology</p> <p>Origasa, Hideki; University of Toyama Faculty of Medicine Graduate School of Medicine and Pharmaceutical Science for Education, Department of Biostatistics and Clinical Epidemiology</p> <p>Inadera, Hidekuni; University of Toyama Faculty of Medicine Graduate School of Medicine and Pharmaceutical Science for Education, Department of Public Health; University of Toyama Toyama Regional Center for JECS</p> |
| Keywords:                     | EPIDEMIOLOGY, Community child health < PAEDIATRICS, PUBLIC HEALTH, STATISTICS & RESEARCH METHODS, non-response, longitudinal cohort study                                                                                                                                                                                                                                                                                                                                                                                                                                                                                                                                                                                                                                                                                                                                                                                                                                                                                                                                                                                                                                                                                                                                                                                                                                                                                                                                                                                                                                                                                                                                                                                 |
|                               |                                                                                                                                                                                                                                                                                                                                                                                                                                                                                                                                                                                                                                                                                                                                                                                                                                                                                                                                                                                                                                                                                                                                                                                                                                                                                                                                                                                                                                                                                                                                                                                                                                                                                                                           |

SCHOLARONE™  
Manuscripts

1  
2  
3  
4  
5  
6  
7  
8  
9 Analysis of non-respondent pregnant women who were registered in the Japan  
10  
11 Environment and Children's Study: a longitudinal cohort study  
12  
13  
14  
15

16 Mika Kigawa<sup>1, 2</sup> mkigawa@med.u-toyama.ac.jp

17  
18 Akiko Tsuchida<sup>2</sup> ecocall4@med.u-toyama.ac.jp

19  
20 Kayoko Miura<sup>3</sup> miura@staff.kanazawa-u.ac.jp

21  
22 Mika Ito<sup>4</sup> mito@med.u-toyama.ac.jp

23  
24 Tomomi Tanaka<sup>2, 5</sup> tharai@med.u-toyama.ac.jp

25  
26 Kei Hamazaki<sup>1, 2</sup> keihama@med.u-toyama.ac.jp

27  
28 Yuichi Adachi<sup>5</sup> yadachi@med.u-toyama.ac.jp

29  
30 Shigeru Saito<sup>4</sup> s30saito@med.u-toyama.ac.jp

31  
32 Hideki Origasa<sup>6</sup> horigasa@las.u-toyama.ac.jp

33  
34 Hidekuni Inadera<sup>1, 2</sup> inadera@med.u-toyama.ac.jp

35  
36  
37  
38  
39  
40  
41  
42  
43 <sup>1</sup>Department of Public Health, Faculty of Medicine, Graduate School of Medicine and  
44  
45 Pharmaceutical Sciences, University of Toyama, 2630 Sugitani, Toyama, Toyama  
46  
47 Prefecture 930-0194, Japan  
48  
49

50  
51 <sup>2</sup>Toyama Regional Center for JECS, University of Toyama, 2630 Sugitani, Toyama,  
52  
53

54  
55 0  
56  
57  
58  
59  
60

1  
2  
3  
4  
5  
6  
7  
8 Toyama Prefecture 930-0194, Japan  
9

10  
11 <sup>3</sup>Kanazawa University Health Service Center, Kadoma, Kanazawa city, Ishikawa  
12  
13 Prefecture 920-1192, Japan  
14  
15

16 <sup>4</sup>Department of Obstetrics and Gynecology, Faculty of Medicine, Graduate School of  
17  
18 Medicine and Pharmaceutical Sciences, University of Toyama, 2630 Sugitani,  
19  
20 Toyama, Toyama Prefecture 930-0194, Japan  
21  
22

23 <sup>5</sup>Department of Pediatrics, Faculty of Medicine, Graduate School of Medicine and  
24  
25 Pharmaceutical Sciences, University of Toyama, 2630 Sugitani, Toyama, Toyama  
26  
27 Prefecture 930-0194, Japan  
28  
29  
30

31 <sup>6</sup>Department of Biostatistics and Clinical Epidemiology, Graduate School of Medicine  
32  
33 and Pharmaceutical Sciences, University of Toyama, 2630 Sugitani, Toyama, Toyama  
34  
35 Prefecture 930-0194, Japan  
36  
37  
38  
39  
40

41 Corresponding author: Mika Kigawa  
42  
43  
44  
45  
46  
47  
48  
49  
50  
51  
52  
53  
54  
55  
56  
57  
58  
59  
60

## Abstract

**Objectives:** Non-response to questionnaires in a longitudinal study reduces the effective sample size and introduces bias. We identified the characteristics of non-respondent pregnant women, and compared them with respondents in the Japan Environment and Children's Study (JECS) during the gestational period. **Design:** This was a questionnaire-based, longitudinal cohort study. **Setting:** Questionnaires were provided by research coordinators to mothers at prenatal examinations (at obstetrics clinics) or by mail. Mothers were measured twice: during the first trimester and during the second/third trimester. **Participants:** Data were collected from the participating mothers of the 10,288 children surveyed in the 2011 baseline JECS. We excluded responses from mothers who had a miscarriage or still birth; therefore, we analysed data from 9,649 participants. **Primary and secondary outcome measures:** Data concerning demographics, medical history, health characteristics, health-related behaviour, and environmental exposure were collected via self-administered questionnaires. The response status of participants' partners and contact with their obstetrician were also examined. Multivariate logistic regression analysis was used to examine factors related to non-response. **Results:** Response was associated with living with one's mother-in-law (odds ratio [OR]: 0.47, 95% confidence interval [CI]: 0.24–0.85), positive participation of

1  
2  
3  
4  
5  
6  
7  
8 participants' partner (OR: 0.25, 95% CI: 0.17–0.35), and multiple visits to the  
9  
10 obstetrician (OR: 0.02, 95% CI: 0.02–0.03). Participants who had a medical history of  
11  
12 allergic rhinitis, had body pain, or drank alcohol had higher odds of responding (ORs:  
13  
14 0.68, 0.96, and 0.36, 95% CIs: 0.48–0.95, 0.95–0.98, and 0.16–0.72, respectively); those  
15  
16 exposed to secondary smoke had lower odds of responding (OR: 1.59, 95% CI: 1.12–2.23).  
17  
18  
19

20  
21 **Conclusions:** The non-response rate decreased when participants reported  
22  
23 health-related behaviour or characteristics. Obtaining the understanding of people  
24  
25 around each participant might help increase response rates.  
26  
27  
28  
29  
30

### 31 **Strengths and limitations of this study**

- 32  
33 ▪ The Japan Environment and Children's Study (JECS) is a nationwide birth cohort  
34  
35 study that includes 10,129 mothers with confirmed obstetric outcomes in the first year  
36  
37 of recruitment.  
38  
39
- 40  
41 ▪ During the gestational period, we provided self-administered questionnaires to  
42  
43 mothers twice.  
44  
45
- 46  
47 ▪ The study is strengthened by its assessment of the effects of non-response on  
48  
49 prevalence estimates as well as the exposure–outcome relationship.  
50
- 51  
52 ▪ The sample size of this study was sufficient to examine the risk factors of  
53  
54

1  
2  
3  
4  
5  
6  
7  
8  
9  
10  
11  
12  
13  
14  
15  
16  
17  
18  
19  
20  
21  
22  
23  
24  
25  
26  
27  
28  
29  
30  
31  
32  
33  
34  
35  
36  
37  
38  
39  
40  
41  
42  
43  
44  
45  
46  
47  
48  
49  
50  
51  
52  
53  
54  
55  
56  
57  
58  
59  
60

non-response.

- We were unable to examine the effects of some socioeconomic factors on non-response.

For peer review only

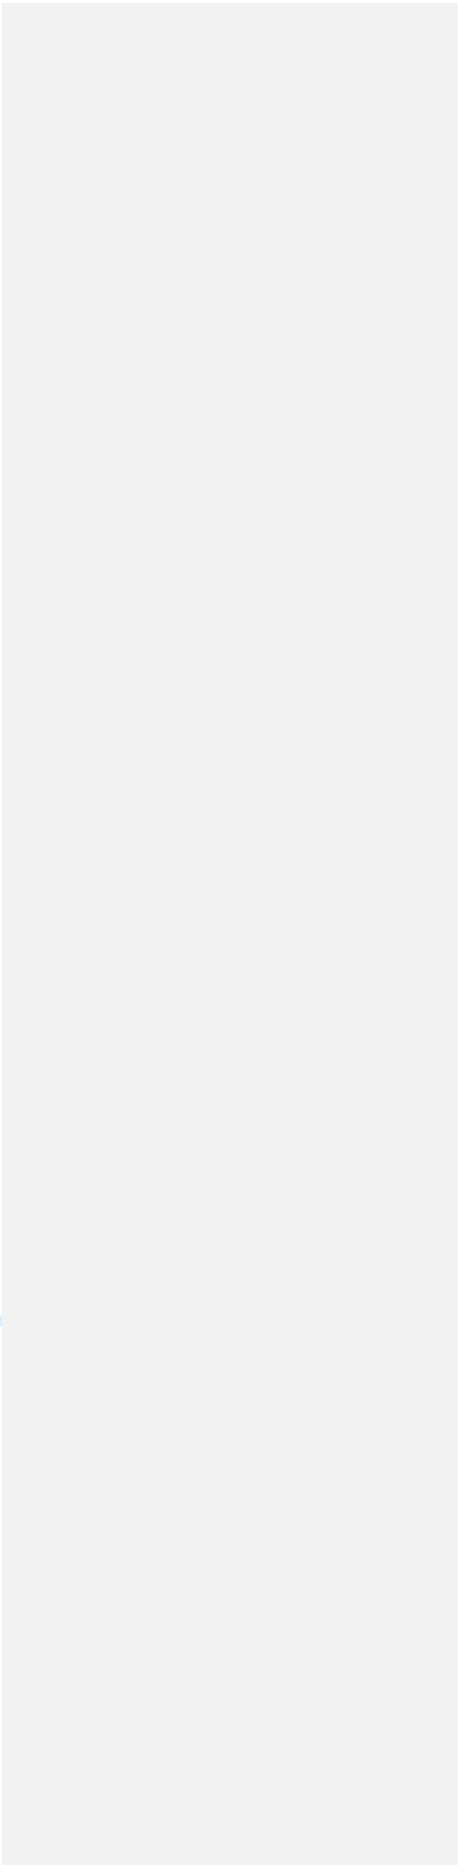

## Background

Population-based studies are used to provide epidemiological data on the occurrence of disease and to identify risk factors that may be relevant to these outcomes. The Japan Environment and Children's Study (JECS) is a nationwide birth cohort study that started recruiting expectant mothers in January 2011. [1]

In the first year of recruitment, approximately 10,000 registered pregnant women had confirmed obstetric outcomes. Data on participants' health-related behaviour, marital status, socioeconomic status, and education level were collected via self-administered questionnaires provided twice during the gestational period.[2]

In recent years, the response rates have decreased in several epidemiological studies, which may lead to selection biases.[3,4] Although a study may achieve a high response rate, the prevalence estimates may still be biased if the non-responses are not random. The characteristics of non-respondents therefore need to be confirmed. Systematic differences in the characteristics of respondents and non-respondents detract from the outcomes of interest. Therefore, the presence and extent of such bias should be investigated.[5] In a cross-sectional health survey, Pietila and colleagues compared the backgrounds of responding and non-responding young men and found that their socioeconomic status and education level were related to their response status.[6]



1  
2  
3  
4  
5  
6  
7  
8  
9 Furthermore, the response status in the Atherosclerosis Risk in Communities Study  
10 differed according to sex and ethnicity.[7]

11  
12  
13 Long-term follow-up studies are hampered by a decrease in response rate due to the  
14 lapse of time between birth and follow-up. A systematic review of randomized controlled  
15 trials using postal questionnaires showed that the response rate was related to the  
16 length and/or design of questionnaire, use of personalized letters, and follow-up contact,  
17 and matched the interests of participants and originating sources.[8] In longitudinal  
18 cohort studies, various factors have been shown to be related to response status,  
19 including age, sex, marital status, education, health status, health-related behaviour,  
20 lifestyle, ethnicity, study objectives, contact modes, number and order of contact modes,  
21 and use of incentives.[9-12]

22  
23  
24  
25  
26  
27  
28  
29  
30  
31  
32  
33  
34  
35  
36 Some authors have suggested that non-response increases the proportion of infants  
37 with adverse outcomes in the remaining study population; however, how these factors  
38 influence study outcomes is unclear.[13] Therefore, we performed this study to describe  
39 the characteristics of non-responders. We studied pregnant women who were registered  
40 in a prospective, cohort study and who did not return the second questionnaire during  
41 the gestational period.  
42  
43  
44  
45  
46  
47  
48  
49  
50  
51  
52  
53  
54  
55  
56  
57  
58  
59  
60

## Methods

### Design of the JECS

In the JECS, self-administered questionnaires were provided to mothers twice: during the first trimester (MT1) and during the second/third trimester (MT2). Questionnaires were provided by research coordinators at prenatal examinations (in the obstetrics clinic) or by mail and returned either by hand at subsequent prenatal visits (in the obstetrics clinic) or by mail. The partners of registered mothers were also asked to participate. We collected data from registered partners during the women's pregnancy through self-administered questionnaires returned by hand or by mail. Women's medical records were transcribed three times, by obstetricians, midwives/nurses, or research coordinators at the obstetrics clinic: during the first trimester, during the second/third trimester, and after delivery.

### Design of the non-responder study

This study was based on a data set (i.e. jecs-ag-ai-20131008), which was released in October 2013 (The dataset supporting the conclusions of this article will be available after the steering committee of the JECS permits its accessibility). The participant flow is illustrated in Figure 1.

Using the MT1 questionnaire, demographic data (age, marital status, and cohabiting

**Comment [31]:** INSERT FIGURE 1 ABOUT HERE

1  
2  
3  
4  
5  
6  
7  
8 family members), medical and obstetric history, health-related behaviour  
9  
10 (smoker/exposure to secondary smoke, and alcohol consumption), and occupational data  
11  
12 were collected. The SF-8™ questionnaire (Japanese version) (Medical Outcomes Trust,  
13  
14 Health Assessment Lab, Quality Metric, Fukuhara S) was used to assess participants'  
15  
16 health-related quality of life (QOL). The K6 questionnaire (Japanese version) was used  
17  
18 to assess participants' psychological distress.[14] Age was divided into four categories:  
19  
20 <25 years, 25–29 years, 30–34 years, and ≥35 years. We collected data of cohabiting  
21  
22 family members via multiple-choice questionnaires.  
23  
24  
25  
26

27  
28 The response data from participants' partners and a transcription sheet regarding  
29  
30 health status data during the gestational period were linked with each participant.  
31  
32

### 33 **Definitions**

34  
35 Health status data during pregnancy was defined as positive based on multiple  
36  
37 visits to obstetricians and using transcription sheet data. Partners' participation status  
38  
39 was defined as positive when partners returned the questionnaire.  
40  
41  
42

43  
44 We collected information on occupation and types of employment of participants with  
45  
46 the MT1 questionnaire. We focused on the following settings: homemakers or  
47  
48 unemployed, worked from home, and employed. For allocation of these settings, we used  
49  
50 the Japan Standard Occupational Classification and the classification of positions in  
51  
52  
53  
54

1  
2  
3  
4  
5  
6  
7  
8 employment by the Ministry of Internal Affairs and Communication.  
9

10  
11       Regarding exposure to secondary smoke before pregnancy, 'daily' was defined as  
12  
13 when participants answered with 'exposed at least once a week'.  
14  
15

### 16 **Patient and Public Involvement**

17  
18 JECS started recruiting expectant mothers in January 2011 with the aim of assessing  
19  
20 environmental factors that affect children's health, with the goal of providing a  
21  
22 foundation for policymaking to safeguard the environment for the next generation.  
23  
24 JECS study aimed to recruit approximately 100,000 pregnant women and their  
25  
26 partners over 3 years, to collect biological samples, and to collect data on their children  
27  
28 until they turned 13 years old.[1]  
29  
30  
31

32  
33       Written informed consent for participation in JECS was obtained from individual  
34  
35 mothers. In addition to the JECS main study, adjunct studies were conducted by the  
36  
37 member of JECS group, or any combination of them. The adjunct studies may have  
38  
39 included procedures that were not adopted by the main study, e.g., collection and  
40  
41 examination of placenta. This study was one of the adjunct studies of JECS, based on an  
42  
43 existing dataset, and hence, patients were not directly involved in the sampling process.  
44  
45  
46  
47

### 48 **Ethical considerations**

49  
50  
51       The JECS protocol was reviewed and approved by the Ministry of the Environment's  
52  
53  
54

1  
2  
3  
4  
5  
6  
7  
8 Institutional Review Board on Epidemiological Studies and by the Ethics Committees of  
9  
10 all participating institutions. Written informed consent was obtained from all  
11  
12 participating women and their partners.  
13  
14

### 15 16 **Statistical analyses**

17  
18 The following variables were considered in the analyses for mothers: demographic  
19  
20 data (age, marital status, and cohabiting family members), medical and obstetric  
21  
22 history, physical and mental health, health-related behaviour, occupation,  
23  
24 environmental exposure, contact status with their obstetrician, and partners' response  
25  
26 status. Student's t-test or Welch's t-test for independent groups was used for continuous  
27  
28 variables and Pearson's chi-square test or Fisher's exact test was used for categorical  
29  
30 variables. The variables that had significant associations with non-response to the MT2  
31  
32 questionnaire in the bivariate logistic regression models were included in the  
33  
34 multivariate models. Prevalence odds ratios and 95% confidence intervals for  
35  
36 non-response were estimated using multivariate logistic regression analyses. The  
37  
38 contribution of a variable to the regression model was assessed using the likelihood  
39  
40 ratio test.  
41  
42  
43  
44  
45  
46

47  
48 A significance level of .05 (two-tailed) was used for all statistical tests. JMP® Pro  
49  
50 version 11 (SAS Institute Inc., Cary, NC, USA) was used for all statistical analyses.  
51  
52  
53  
54

## Results

The overall response rate to the questionnaire in the second/third trimester was 97.7% (9432/9649). Table 1 shows participants' characteristics at the first trimester, their partners' participating status, and visits to the obstetrician among responders and non-responders. The proportions of marital status, family members, medical history, exposure to secondary smoke, and job status significantly differed between responders and non-responders. The responders were more likely to be married, living with in-laws, have a history of allergic rhinitis or allergic conjunctivitis, have better physical functioning, have a high response rate from their partner, and make more visits to the obstetrician. Additionally, responders were less likely to have a history of migraines or polycystic ovary syndrome than were non-responders. Non-responders were more likely to have been exposed to secondary smoke than were responders. Participants who were employed were more likely to respond than were their counterparts. The SF-8 Physical Functioning and Body Pain scales were significantly higher for responders than for non-responders.

Two variables showed significant associations—living with one's mother-in-law and having allergic rhinitis—with non-response according to the bivariate logistic

**Comment [32]:** INSERT TABLE 1 ABOUT HERE

1  
2  
3  
4  
5  
6  
7  
8 regression model. Table 2 shows the odds ratios for non-response according to the  
9  
10 various demographic and clinical characteristics, partners' participation status, and  
11  
12 visiting obstetricians in the multivariate logistic regression analyses. Model 1 included  
13  
14 the variables that had significant associations with non-response of MT2.  
15  
16

17  
18 The odds of non-response were lower in participants who had a medical history of  
19  
20 allergies, which is one of the priority outcomes of the JECS[1]; had a positive QOL; were  
21  
22 living with their mother-in-law; had partners who active participated; and had  
23  
24 maintained contact with obstetricians. However, the odds of non-response were higher  
25  
26 in participants who had been exposed to secondary smoke. Marital status, job site, and  
27  
28 the SF-8 physical functioning scale did not match the model, and thus were excluded.  
29  
30  
31

32  
33 Model 2 excluded variables that did not show significance in Model 1. The odds of  
34  
35 non-response were higher in participants who had been exposed to secondary smoke;  
36  
37 however, the odds were lower in participants who lived with their mother-in-law, had a  
38  
39 history of allergic rhinitis, had a positive QOL regarding body pain, had partners who  
40  
41 participated, and visited the obstetrician.  
42  
43  
44  
45  
46  
47

## 48 Discussion

49

50  
51 Using data collected during pregnancy, we evaluated non-response bias in  
52  
53  
54

Comment [33]: INSERT TABLE 2  
ABOUT HERE

1  
2  
3  
4  
5  
6  
7  
8 approximately 10,000 pregnant women who participated in the JECS. Many factors  
9  
10 were independently associated with response to the follow-up questionnaire. The  
11  
12 characteristics associated with a greater probability of response included being married,  
13  
14 living with one's mother-in-law, and where the participants worked. Having a medical  
15  
16 history of allergic rhinitis or allergic conjunctivitis resulted in a higher probability of  
17  
18 response. The number of partners with positive participation in the JECS and multiple  
19  
20 visits to the obstetrician were significantly lower in non-responders than in responders.  
21  
22  
23  
24  
25

26 The odds ratios for non-response were correlated with demographic and clinical  
27  
28 characteristics, partners' participation status, and visiting the obstetrician in the  
29  
30 multivariate logistic regression analysis. Specifically, the odds of non-response were  
31  
32 lower in participants who had a medical history of allergies, which is one of the priority  
33  
34 outcomes of the JECS; who had a positive QOL; who were living with their  
35  
36 mother-in-law; whose partners participated; and who maintained contact with  
37  
38 obstetricians. The odds of non-response were higher in participants who had been  
39  
40 exposed to secondary smoke. Baron and colleagues reported that passive smoking  
41  
42 showed disparity across educational levels.[15] We could not consider the effects of  
43  
44 education; however, the relationship between non-response and exposure to secondary  
45  
46 smoke might be affected by participants' education.  
47  
48  
49  
50  
51  
52  
53  
54  
55  
56  
57  
58  
59  
60



1  
2  
3  
4  
5  
6  
7  
8  
9 One of the objectives of the JECS was to assess environmental factors that affect  
10 children's health (e.g. allergic diseases). The prevalence of allergic rhinitis in the  
11 Japanese population was 44.2% in 2006–2007[16] and that of allergic conjunctivitis  
12 disease was 14.8% in 1993.[17] Both were higher than those reported in the current  
13 study (35.9% and 10.9%, respectively). Macera and colleagues reported that responders  
14 were individuals who had family members with certain chronic conditions in their  
15 health-related survey.[18] Leadbetter and colleagues examined the perceived risk of  
16 cancer by comparing early and late responders. They reported that the salience of the  
17 survey topic was associated with a prompt response.[19] In this survey, participants  
18 with interest in children's allergic diseases were more likely to respond; however, daily  
19 exposure to secondary smoke made non-responses more likely. In health-related surveys,  
20 participants with risky health behaviours are more likely to be non-respondents than  
21 are those who exhibit healthier behaviour.[20]

22  
23  
24  
25  
26  
27  
28  
29  
30  
31  
32  
33  
34  
35  
36  
37  
38  
39  
40  
41 Etter and colleagues reported that respondents had better general health than did  
42 non-respondents.[21] Martikainen and colleagues evaluated non-response bias in  
43 analyses of social class inequalities in health.[22] They found that female  
44 non-respondents had an approximately 20–30% higher sickness absence rate per 100  
45 person-years than did respondents. Our results from the Body Pain scale showed that  
46  
47  
48  
49  
50  
51  
52  
53  
54

1  
2  
3  
4  
5  
6  
7  
8 respondents were healthier than were non-respondents, which is consistent with these  
9  
10 previous results. The response rate was higher among participants who lived with their  
11  
12 mother-in-law, those who had partners who positively participated, and those who  
13  
14 maintained contact with an obstetrician. Alessi and colleagues suggested that general  
15  
16 practitioners' understanding of the study could influence the attitude of their  
17  
18 patients.[23] Our results indicate that the same is true for people close to the  
19  
20 participants. Hatta and colleagues reported that parents-in-law were perceived as the  
21  
22 least cohesive persons among close family members in Japan.[24] Another study of  
23  
24 postpartum depression in China reported that the underlying cultural setting of the  
25  
26 daughter-in-law/mother-in-law relationship contributed to depression among  
27  
28 daughters-in-law.[25] In our survey, the presence of a mother-in-law may have acted as  
29  
30 a stressor to motivate the participants to return the questionnaires. Further, we  
31  
32 collected participants' job status and categorized it into three modes: homemakers or  
33  
34 unemployed, worked from home, and employed. The response rate depended on  
35  
36 participants' job, with a higher response rate being found among participants working  
37  
38 from home than among those whose job location was outside of their home. In the  
39  
40 Survey on Time Use and Leisure Activities in 2011,[26] women who worked from home  
41  
42 (family workers) spent more time on housework and less time on self-education/training  
43  
44  
45  
46  
47  
48  
49  
50  
51  
52  
53  
54  
55  
56  
57  
58  
59  
60

1  
2  
3  
4  
5  
6  
7  
8 and hobbies/amusement than did those who were employed outside of their home.

9  
10 Associations with response to the questionnaire were also observed for job location and  
11  
12 time spent answering the questionnaire; however, these relationships were weak.  
13  
14

15  
16 The limitations of this study are as follows: 1) a lack of information on education  
17  
18 level and participants' socioeconomic status, 2) a lack of information on the survey mode,  
19  
20 and 3) a lack of information on partners' registration status. However, we know that  
21  
22 socioeconomic status and education level are related to response status.[6,27-29]  
23  
24

25  
26 Although we collected socioeconomic and educational data on the MT2 questionnaire,  
27  
28 we failed to consider these effects because they were beyond the scope of our objectives.  
29  
30

31 In addition, several researchers have reported that response status differs according to  
32  
33 survey mode.[30-33] In this study, we collected questionnaires by hand or by mail.  
34  
35

36 Because we were unable to collect data on the mode used, we did not evaluate the effect  
37  
38 of these distinct modes. We were also unable to collect information regarding the extent  
39  
40 of partners' participation—any response was considered positive. Finally, we could not  
41  
42 confirm participants' medical or obstetric history using clinical data. Relying solely on  
43  
44 data collected by self-administered questionnaires introduces the risk of response bias.  
45  
46  
47  
48  
49  
50

## 51 **Conclusions**

52  
53  
54

1  
2  
3  
4  
5  
6  
7  
8  
9 In conclusion, this study showed that obtaining understanding of the research  
10 objectives from people who are close to the participants was associated with a higher  
11 odds of response. To reduce the non-response rate in future follow-up surveys,  
12 additional efforts should be made to maintain contact and encourage participation  
13 among individuals who display relevant characteristics of potential non-responders.  
14  
15  
16  
17  
18  
19  
20  
21

## 22 **Declarations**

### 23 **Data sharing statement**

24  
25  
26  
27 The dataset supporting the conclusions of this article will be available after the  
28 steering committee of the JECS allows it to become available.  
29

30  
31  
32 The dataset supporting the conclusions of this article is unsuitable for public  
33 deposition due to ethical restrictions and legal framework of Japan. The Act on the  
34 Protection of Personal Information (Act No. 57 of 30 May 2003; amendment on 9  
35 September 2015) prohibits publicly depositing data containing personal information.  
36  
37  
38

39  
40 The Ethical Guidelines for Medical and Health Research Involving Human Subjects,  
41 which are enforced by the Japan Ministry of Education, Culture, Sports, Science and  
42 Technology and the Ministry of Health, Labour and Welfare, also restrict the open  
43 sharing of epidemiologic data. All inquiries about access to these data should be sent to  
44  
45  
46  
47  
48  
49  
50  
51  
52 Dr. Shoji F. Nakayama, JECS Programme Office, National Institute for Environmental  
53  
54

1  
2  
3  
4  
5  
6  
7  
8  
9 Studies; email: jecs-en@nies.go.jp.

### 10 11 **Competing interests**

12  
13 The authors declare that they have no competing interests.

### 14 15 16 **Funding**

17  
18 The Japan Environment and Children's Study was supported by the Ministry of the  
19 Environment, Japan. The findings and conclusions of this article are solely the  
20 responsibility of the authors and do not represent the official views of the  
21 above-mentioned government.  
22  
23  
24  
25  
26  
27

### 28 29 **Authors' contributions**

30  
31 MK designed and conducted the study, performed the statistical analyses, and wrote  
32 the manuscript. KM helped draft the manuscript. AT conducted the data collection and  
33 helped draft the manuscript. MI and TT conducted data collection and helped critically  
34 revise the manuscript. KH and HI participated in the study design and helped critically  
35 revise the manuscript. HO assisted with the statistical analyses. YA and SS helped  
36 critically revise the manuscript. All authors have read and approved the final  
37 manuscript.  
38  
39  
40  
41  
42  
43  
44  
45  
46  
47

### 48 49 **Figure legend**

50  
51 Figure 1. Participant (expecting mothers) flow  
52  
53  
54

## Acknowledgements

We thank all members of the JECS as of 2015: Toshihiro Kawamoto (principal investigator), Hirohisa Saito (Medical Support Center for the JECS, National Center for Child Health and Development, Tokyo, Japan), Reiko Kishi (Hokkaido Regional Center for the JECS, Hokkaido University, Sapporo, Japan), Nobuo Yaegashi (Miyagi Regional Center for the JECS, Tohoku University, Sendai, Japan), Koichi Hashimoto (Fukushima Regional Center for the JECS, Fukushima Medical University, Fukushima, Japan), Chisato Mori (Chiba Regional Center for the JECS, Chiba University, Chiba, Japan), Fumiki Hirahara (Kanagawa Regional Center for the JECS, Yokohama City University, Yokohama, Japan), Zentaro Yamagata (Koshin Regional Center for the JECS, University of Yamanashi, Chuo, Japan), Hidekuni Inadera (Toyama Regional Center for the JECS, University of Toyama, Toyama, Japan), Michihiro Kamijima (Aichi Regional Center for the JECS, Nagoya City University, Nagoya, Japan), Ikuo Konishi (Kyoto Regional Center for the JECS, Kyoto University, Kyoto, Japan), Hiroyasu Iso (Osaka Regional Center for the JECS, Osaka University, Suita, Japan), Masayuki Shima (Hyogo Regional Center for the JECS, Hyogo College of Medicine, Nishinomiya, Japan), Toshihide Ogawa (Tottori Regional Center for the JECS, Tottori University, Yonago, Japan), Narufumi Suganuma (Kochi Regional Center for the JECS, Kochi University,

1  
2  
3  
4  
5  
6  
7  
8  
9  
10  
11  
12  
13  
14  
15  
16  
17  
18  
19  
20  
21  
22  
23  
24  
25  
26  
27  
28  
29  
30  
31  
32  
33  
34  
35  
36  
37  
38  
39  
40  
41  
42  
43  
44  
45  
46  
47  
48  
49  
50  
51  
52  
53  
54  
55  
56  
57  
58  
59  
60

Nankoku, Japan), Koichi Kusahara (Fukuoka Regional Center for the JECS, University of Occupational and Environmental Health, Kitakyushu, Japan), and Takahiko Katoh (South Kyushu/Okinawa Regional Center for the JECS, Kumamoto University, Kumamoto, Japan).

For peer review only

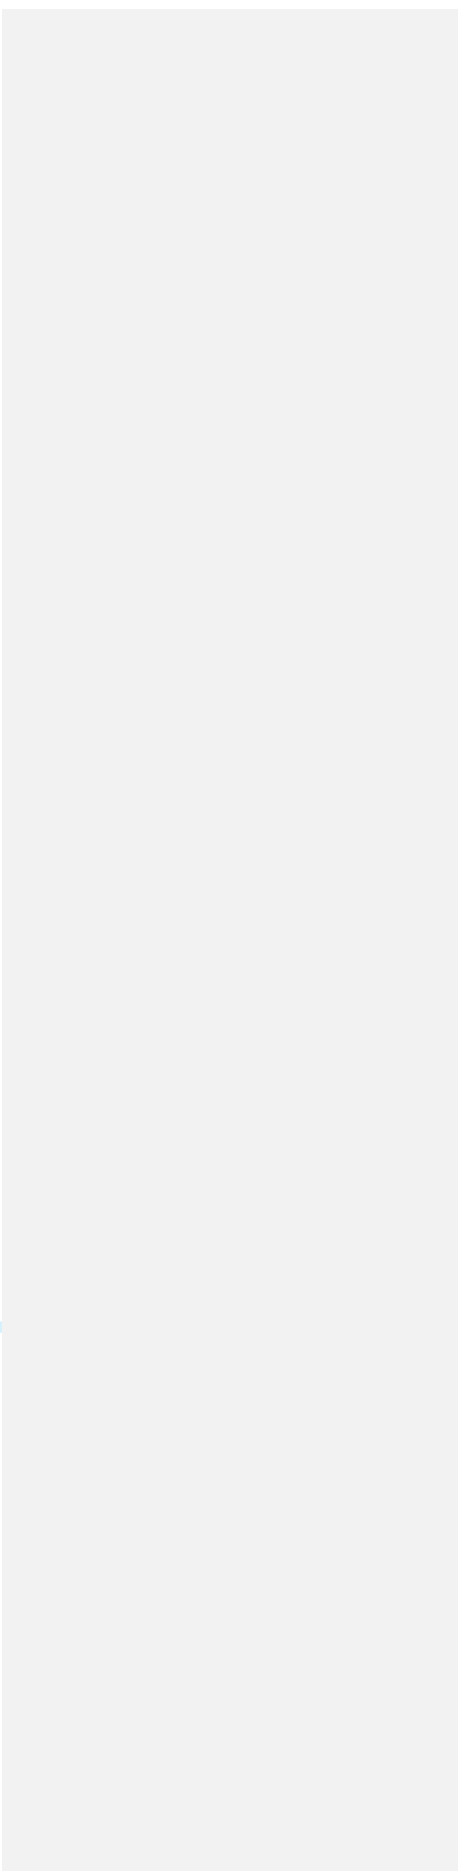

## References

1. Kawamoto T, Nitta H, Murata K, *et al.* Rationale and study design of the Japan environment and children's study (JECS). *BMC Public Health* 2014;14:25.
2. Michikawa T, Nitta H, Nakayama SF, *et al.* The Japan Environment and Children's Study (JECS): A preliminary report on selected characteristics of approximately 10 000 pregnant women recruited during the first year of the study. *J Epidemiol* 2015;25(6):452–458.
3. Christensen AI, Ekholm O, Gray L, *et al.* What is wrong with non-respondents? Alcohol-, drug- and smoking-related mortality and morbidity in a 12-year follow-up study of respondents and non-respondents in the Danish Health and Morbidity Survey. *Addiction* 2015;110(9):1505–12.
4. Schneider KL, Clark MA, Rakowski W, *et al.* Evaluating the impact of non-response bias in the Behavioral Risk Factor Surveillance System (BRFSS). *J Epidemiol Community Health* 2012;66(4):290–5.
5. Stang A. Nonresponse research—an underdeveloped field in epidemiology. *Eur J Epidemiol* 2003;18(10):929–31.
6. Pietilä AM, Rantakallio P, Laara E. Background factors predicting non-response in a health survey of northern Finnish young men. *Scand J Soc Med* 1995;23(2):129–36.
7. Jackson R, Chambless LE, Yang K, *et al.* Differences between respondents and nonrespondents in a multicenter community-based study vary by gender ethnicity. The Atherosclerosis Risk in Communities (ARIC) Study Investigators. *J Clin Epidemiol* 1996;49(12):1441–6.
8. Edwards P, Roberts I, Clarke M, *et al.* Increasing response rates to postal questionnaires: Systematic review. *BMJ* 2002;324(7347):1183.
9. Young AF, Powers JR, Bell SL. Attrition in longitudinal studies: Who do you lose? *Aust NZ J Public Health* 2006;30(4):353–61.
10. Powers J, Loxton D. The impact of attrition in an 11-year prospective longitudinal study of younger women. *Ann Epidemiol* 2010;20(4):318–21.
11. Launes J, Hokkanen L, Laasonen M, *et al.* Attrition in a 30-year follow-up of a perinatal birth risk cohort: Factors change with age. *PeerJ* 2014;2:e480.
12. Sheikh K, Mattingly S. Investigating non-response bias in mail surveys. *J Epidemiol Community Health* 1981;35(4):293–6.
13. Wolke D, Sohne B, Ohrt B, *et al.* Follow-up of preterm children: Important to document dropouts. *Lancet* 1995;345(8947):447.
14. Furukawa TA, Kawakami N, Saitoh M, *et al.* The performance of the Japanese



- 1  
2  
3  
4  
5  
6  
7  
8 version of the K6 and K10 in the World Mental Health Survey Japan. *Int J Methods*  
9 *Psychiatr Res* 2008;17(3):152–8.
- 10 15. Baron R, Mannien J, te Velde SJ, et al. Socio-demographic inequalities across a  
11 range of health status indicators and health behaviours among pregnant women in  
12 prenatal primary care: a cross-sectional study. *BMC Pregnancy Childbirth*  
13 2015;15:261.
- 14 16. Sakashita M, Hirota T, Harada M, et al. Prevalence of allergic rhinitis and  
15 sensitization to common aeroallergens in a Japanese population. *Int Arch Allergy*  
16 *Immunol* 2010;151(3):255–61.
- 17 17. Fernandez C. Ethical issues in health research in children. *Paediatr Child Health*  
18 2008;13(8):707–12.
- 19 18. Macera CA, Jackson KL, Davis DR, et al. Patterns of non-response to a mail survey.  
20 *J Clin Epidemiol* 1990;43(12):1427–30.
- 21 19. Leadbetter S, Hawkins NA, Scholl LE, et al. Recruiting women for a study on  
22 perceived risk of cancer: influence of survey topic salience and early versus late  
23 response. *Prev Chronic Dis* 2013;10:E75.
- 24 20. Goldberg M, Chastang JF, Zins M, et al. Health problems were the strongest  
25 predictors of attrition during follow-up of the GAZEL cohort. *J Clin Epidemiol*  
26 2006;59(11):1213–21.
- 27 21. Etter JF, Perneger TV. Analysis of non-response bias in a mailed health survey. *J*  
28 *Clin Epidemiol* 1997;50(10):1123–8.
- 29 22. Martikainen P, Laaksonen M, Piha K, et al. Does survey non-response bias the  
30 association between occupational social class and health? *Scand J Public Health*  
31 2007;35(2):212–5.
- 32 23. Alessi D, Pastore G, Zuccolo L, et al. Analysis of nonresponse in the assessment of  
33 health-related quality of life of childhood cancer survivors. *Eur J Cancer Prev*  
34 2007;16(6):576–80.
- 35 24. Hatta T, Kadobayashi S, Iwamoto T, et al. Interpersonal constructs of pregnant  
36 married women during pregnancy and postpartum period as perceptions of family  
37 members. *Percept Mot Skills* 2000;91(3 Pt 1):789–99.
- 38 25. Gao LL, Chan SW, You L, et al. Experiences of postpartum depression among  
39 first-time mothers in mainland China. *J Adv Nurs* 2010;66(2):303–12.
- 40 26. Statistics Bureau, Ministry of Internal Affairs. Survey on time use and leisure  
41 activities. In., 2013/4/1 edn; 2013.
- 42 27. Helasoja V, Prattala R, Dregval L, et al. Late response and item nonresponse in the  
43 Finbalt Health Monitor survey. *Eur J Public Health* 2002;12(2):117–23.
- 44  
45  
46  
47  
48  
49  
50  
51  
52  
53  
54  
55  
56  
57  
58  
59  
60

- 1  
2  
3  
4  
5  
6  
7  
8 28. Tolonen H, Laatikainen T, Helakorpi S, et al. Marital status, educational level and  
9 household income explain part of the excess mortality of survey non-respondents.  
10 *Eur J Epidemiol* 2010;25(2):69–76.  
11  
12 29. Secor-Turner M, Sieving R, Widome R, et al. Active parent consent for health  
13 surveys with urban middle school students: Processes and outcomes. *J School*  
14 *Health* 2010;80(2):73–9.  
15  
16 30. Bongers IMB, Van Oers JAM. Mode effects on self-reported alcohol use and problem  
17 drinking: Mail questionnaires and personal interviewing compared. *J Stud Alcohol*  
18 1998;59(3):280–5.  
19  
20 31. Tse A, Ching R, Ding YB, et al. A comparison of the effectiveness of mail and  
21 facsimile as survey media on response rate, speed and quality. *J Market Res Soc*  
22 1994;36(4):349–55.  
23  
24 32. Aquilino WS. Telephone versus face-to-face interviewing for household drug use  
25 surveys. *Int J Addict* 1992;27(1):71–91.  
26  
27 33. Picavet HSJ. National health surveys by mail or home interview: Effects on  
28 response. *J Epidemiol Community Health* 2001;55(6):408–13.  
29  
30 1. Kawamoto T, Nitta H, Murata K, et al. Rationale and study design of the Japan  
31 environment and children's study (JECS). *BMC public health* 2014;14:25. doi:  
32 10.1186/1471-2458-14-25  
33  
34 2. Michikawa T, Nitta H, Nakayama SF, et al. The Japan Environment and Children's Study  
35 (JECS): A Preliminary Report on Selected Characteristics of Approximately 10 000  
36 Pregnant Women Recruited During the First Year of the Study. *J Epidemiol*  
37 2015;25(6):452-8. doi: 10.2188/jea.JE20140186  
38  
39 3. Christensen AI, Ekholm O, Gray L, et al. What is wrong with non-respondents? Alcohol-,  
40 drug- and smoking-related mortality and morbidity in a 12-year follow-up study of  
41 respondents and non-respondents in the Danish Health and Morbidity Survey.  
42 *Addiction* 2015;110(9):1505-12. doi: 10.1111/add.12939  
43  
44 4. Schneider KL, Clark MA, Rakowski W, et al. Evaluating the impact of non-response bias  
45 in the Behavioral Risk Factor Surveillance System (BRFSS). *Journal of*  
46 *epidemiology and community health* 2012;66(4):290-5. doi: 10.1136/jech.2009.103861  
47  
48 5. Stang A. Nonresponse research--an underdeveloped field in epidemiology. *Eur J*  
49 *Epidemiol* 2003;18(10):929-31.  
50  
51 6. Pietila AM, Rantakallio P, Laara E. Background factors predicting non-response in a  
52 health survey of northern Finnish young men. *Scandinavian journal of social*  
53 *medicine* 1995;23(2):129-36.  
54  
55  
56  
57  
58  
59  
60

7. Jackson R, Chambless LE, Yang K, et al. Differences between respondents and nonrespondents in a multicenter community-based study vary by gender ethnicity. The Atherosclerosis Risk in Communities (ARIC) Study Investigators. *J Clin Epidemiol* 1996;49(12):1441-46.
8. Edwards P, Roberts I, Clarke M, et al. Increasing response rates to postal questionnaires: systematic review. *BMJ* 2002;324(7347):1183.
9. Young AF, Powers JR, Bell SL. Attrition in longitudinal studies: who do you lose? *Australian and New Zealand journal of public health* 2006;30(4):353-61.
10. Powers J, Loxton D. The Impact of Attrition in an 11-Year Prospective Longitudinal Study of Younger Women. *Annals of epidemiology* 2010;20(4):318-21. doi: 10.1016/j.annepidem.2010.01.002
11. Launes J, Hokkanen L, Laasonen M, et al. Attrition in a 30-year follow-up of a perinatal birth risk cohort: factors change with age. *Peerj* 2014;2 doi: UNSP e480 10.7717/peerj.480
12. Sheikh K, Mattingly S. Investigating non-response bias in mail surveys. *Journal of epidemiology and community health* 1981;35(4):293-6.
13. Wolke D, Sohne B, Ohrt B, et al. Follow-up of preterm children: important to document dropouts. *Lancet* 1995;345(8947):447.
14. Furukawa TA, Kawakami N, Saitoh M, et al. The performance of the Japanese version of the K6 and K10 in the World Mental Health Survey Japan. *Int J Methods Psychiatr Res* 2008;17(3):152-8. doi: 10.1002/mpr.257
15. Baron R, Mannien J, te Velde SJ, et al. Socio-demographic inequalities across a range of health status indicators and health behaviours among pregnant women in prenatal primary care: a cross-sectional study. *BMC Pregnancy Childbirth* 2015;15:261. doi: 10.1186/s12884-015-0676-z
16. Sakashita M, Hirota T, Harada M, et al. Prevalence of allergic rhinitis and sensitization to common aeroallergens in a Japanese population. *Int Arch Allergy Immunol* 2010;151(3):255-61. doi: 10.1159/000242363
17. Ethical issues in health research in children. *Paediatr Child Health* 2008;13(8):707-20.
18. Macera CA, Jackson KL, Davis DR, et al. Patterns of non-response to a mail survey. *J Clin Epidemiol* 1990;43(12):1427-30.
19. Leadbetter S, Hawkins NA, Scholl LE, et al. Recruiting women for a study on perceived risk of cancer: influence of survey topic salience and early versus late response. *Preventing chronic disease* 2013;10:E75. doi: 10.5888/pcd10.120293
20. Goldberg M, Chastang JF, Zins M, et al. Health problems were the strongest predictors of attrition during follow-up of the GAZEL cohort. *J Clin Epidemiol*

- 2006;59(11):1213-21. doi: 10.1016/j.jclinepi.2006.02.020
21. Etter JF, Perneger TV. Analysis of non-response bias in a mailed health survey. *J Clin Epidemiol* 1997;50(10):1123-8.
  22. Martikainen P, Laaksonen M, Piha K, et al. Does survey non-response bias the association between occupational social class and health? *Scand J Public Health* 2007;35(2):212-5. doi: 10.1080/14034940600996563
  23. Alessi D, Pastore G, Zuccolo L, et al. Analysis of nonresponse in the assessment of health-related quality of life of childhood cancer survivors. *European journal of cancer prevention : the official journal of the European Cancer Prevention Organisation* 2007;16(6):576-80. doi: 10.1097/CEJ.0b013e32801023ee
  24. Hatta T, Kadobayashi S, Iwamoto T, et al. Interpersonal constructs of pregnant married women during pregnancy and postpartum period as perceptions of family members. *Perceptual and motor skills* 2000;91(3 Pt 1):789-99. doi: 10.2466/pms.2000.91.3.789
  25. Gao LL, Chan SW, You L, et al. Experiences of postpartum depression among first-time mothers in mainland China. *Journal of advanced nursing* 2010;66(2):303-12. doi: 10.1111/j.1365-2648.2009.05169.x
  26. Statistics Bureau MoIA. Survey on Time Use and Leisure Activities. 2013/4/1 ed, 2013.
  27. Helasoja V, Prattala R, Dregval L, et al. Late response and item nonresponse in the Finbalt Health Monitor survey. *European journal of public health* 2002;12(2):117-23.
  28. Tolonen H, Laatikainen T, Helakorpi S, et al. Marital status, educational level and household income explain part of the excess mortality of survey non-respondents. *Eur J Epidemiol* 2010;25(2):69-76. doi: 10.1007/s10654-009-9389-9
  29. Secor-Turner M, Sieving R, Widome R, et al. Active Parent Consent for Health Surveys With Urban Middle School Students: Processes and Outcomes. *J School Health* 2010;80(2):73-79.
  30. Bongers IMB, Van Oers JAM. Mode effects on self-reported alcohol use and problem drinking: Mail questionnaires and personal interviewing compared. *Journal of studies on alcohol* 1998;59(3):280-85.
  31. Tse A, Ching R, Ding YB, et al. A Comparison of the Effectiveness of Mail and Facsimile as Survey Media on Response Rate, Speed and Quality. *J Market Res Soc* 1994;36(4):349-55.
  32. Aquilino WS. Telephone versus face-to-face interviewing for household drug use surveys. *The International journal of the addictions* 1992;27(1):71-91.
  33. Picavet HSJ. National health surveys by mail or home interview: effects on response. *Journal of epidemiology and community health* 2001;55(6):408-13. doi: DOI 10.1136/jech.55.6.408

Table 1. Baseline characteristics of sample

|                                                          | Responder<br>(n=9,432) | Non-responder<br>(n= 217) | p value |
|----------------------------------------------------------|------------------------|---------------------------|---------|
|                                                          | %                      | %                         |         |
| Age                                                      |                        |                           | 0.205   |
| < 25                                                     | 9.1                    | 10.4                      |         |
| 25 – 29                                                  | 27.3                   | 24.2                      |         |
| 30 – 34                                                  | 35.8                   | 42.3                      |         |
| >= 35                                                    | 27.8                   | 23.1                      |         |
| Marital status                                           |                        |                           | 0.024   |
| Married                                                  | 95.8                   | 93.9                      |         |
| Unmarried                                                | 3.2                    | 3.3                       |         |
| Divorced/widowed                                         | 1.0                    | 2.8                       |         |
| Family member participants living with                   |                        |                           |         |
| none                                                     | 0.7                    | 0.9                       | 0.661*  |
| Partner                                                  | 93.0                   | 91.7                      | 0.471   |
| Children                                                 | 55.3                   | 54.8                      | 0.892   |
| Father                                                   | 7.6                    | 5.5                       | 0.298*  |
| Mother                                                   | 9.9                    | 8.8                       | 0.646*  |
| Brother / sister                                         | 4.2                    | 5.9                       | 0.218   |
| Father-in-law                                            | 9.4                    | 5.5                       | 0.045*  |
| Mother-in-law                                            | 11.6                   | 5.5                       | 0.005*  |
| Brother / sister-in-law                                  | 3.1                    | 0.9                       | 0.071*  |
| 1 <sup>st</sup> pregnancy                                | 30.5                   | 31.0                      | 0.940*  |
| Medical history                                          |                        |                           |         |
| Have allergic rhinitis                                   | 35.9                   | 26.7                      | 0.005*  |
| Have allergic conjunctivitis                             | 10.9                   | 6.4                       | 0.035*  |
| Smoking habits during early pregnancy                    |                        |                           | 0.072   |
| Never smoked                                             | 56.8                   | 50.0                      |         |
| Ex-smokers who quit before pregnancy                     | 24.2                   | 25.2                      |         |
| Ex-smokers who quit after pregnancy                      | 13.5                   | 15.9                      |         |
| Smoker                                                   | 5.5                    | 8.9                       |         |
| Exposed to secondary smoke before pregnancy <sup>a</sup> |                        |                           | < 0.001 |
| Rarely                                                   | 80.2                   | 71.0                      |         |
| Daily                                                    | 19.8                   | 29.0                      |         |

|                                                 |           |           |                    |
|-------------------------------------------------|-----------|-----------|--------------------|
| Alcohol consumption during early pregnancy      |           |           | 0.006*             |
| Never drinker                                   | 35.0      | 40.4      |                    |
| Ex-drinkers                                     | 55.0      | 55.4      |                    |
| Drinkers                                        | 10.0      | 4.2       |                    |
| Job site of participants                        |           |           | 0.011              |
| Housewife / unemployed                          | 42.2      | 52.2      |                    |
| Work from home                                  | 3.4       | 3.9       |                    |
| Employed                                        | 54.4      | 43.9      |                    |
| Relationship with others                        |           |           |                    |
| Visits obstetrician <sup>b</sup>                | 97.8      | 54.3      | < 0.001*           |
| Positive participation of partners <sup>c</sup> | 60.4      | 23.9      | < 0.001*           |
|                                                 | Mean, SE  | Mean, SE  | p value            |
| No. of household member                         | 3.3, 0.01 | 3.1, 0.09 | 0.094 <sup>+</sup> |
| Health Related Quality of Life (SF-8)           |           |           |                    |
| General Health                                  | 46.9, 0.1 | 46.7, 0.5 | 0.772              |
| Physical Functioning                            | 46.6, 0.1 | 45.5, 0.5 | 0.027              |
| Role Physical                                   | 43.7, 0.1 | 43.5, 0.6 | 0.756              |
| Body Pain                                       | 50.0, 0.1 | 48.7, 0.6 | 0.025              |
| Vitality                                        | 47.5, 0.1 | 47.2, 0.5 | 0.452              |
| Social Functioning                              | 44.2, 0.1 | 43.4, 0.6 | 0.203              |
| Mental Health                                   | 47.0, 0.1 | 46.2, 0.5 | 0.062              |
| Role Emotional                                  | 47.2, 0.1 | 46.5, 0.5 | 0.198              |
| Physical Component Summary                      | 45.5, 0.1 | 44.8, 0.5 | 0.203              |
| Mental Component Summary                        | 46.3, 0.1 | 45.6, 0.5 | 0.164              |
| Self-Administered mental health (K6)            | 9.6, 0.0  | 10.1, 0.3 | 0.097 <sup>+</sup> |

\*: Fisher's exact test, +: Welch's t test

a: 'Daily' defined as subjects exposed at least once a week.

b: Participants who collected the transcription sheet defined as multiple visits with obstetrician.

c: Positive participation of partner was those who answered the questionnaire .

Table 2. (a) Multivariate Logistic Regression Predicting the likelihood of Survey

Non-response : model 1

| Variable                                                           | OR (95% CI)       | p value |
|--------------------------------------------------------------------|-------------------|---------|
| Marital status                                                     |                   |         |
| Married                                                            | Reference         |         |
| Unmarried                                                          | 0.64 (0.23, 1.48) | 0.324   |
| Divorced/widowed                                                   | 1.22 (0.28, 3.52) | 0.750   |
| Living with mother-in-law (yes / no)                               | 0.50 (0.25, 0.90) | 0.020   |
| Job site of participants                                           |                   |         |
| Housewife or unemployed                                            | Reference         |         |
| Work from home                                                     | 1.58 (0.67, 3.26) | 0.173   |
| Employed                                                           | 0.86 (0.62, 1.19) | 0.107   |
| Medical history of allergic rhinitis (yes / no)                    | 0.62 (0.43, 0.88) | 0.007   |
| Health Related Quality of Life (Physical Functioning)              | 0.98 (0.96, 1.00) | 0.135   |
| Health Related Quality of Life (Body Pain)                         | 0.97 (0.95, 0.98) | 0.002   |
| Exposed to secondary smoke during early pregnancy (daily / rarely) | 1.48 (1.03, 2.11) | 0.034   |
| Alcohol consumption                                                |                   |         |
| Drinker during early pregnancy / never drunk                       | 0.34 (0.14, 0.71) | 0.002   |
| Drinker during early pregnancy / ex-drinkers                       | 0.45 (0.19, 0.92) | 0.027   |
| Relationship with others                                           |                   |         |
| Visits to obstetrician (yes / no)                                  | 0.02 (0.02, 0.04) | <0.001  |
| Positive participation of partners (yes / no)                      | 0.26 (0.18, 0.36) | <0.001  |

AICc: 1427.9, LOF: p=1.000

Table 2. (b) Multivariate Logistic Regression Predicting the likelihood of Survey Non-response : model 2

| Variable                                                    | OR (95% CI)       | p value |
|-------------------------------------------------------------|-------------------|---------|
| Living with mother-in-law (yes / no)                        | 0.47 (0.24, 0.85) | 0.011   |
| Having history of allergic rhinitis (yes / no)              | 0.68 (0.48, 0.95) | 0.024   |
| Health Related Quality of Life (Body Pain)                  | 0.96 (0.95, 0.98) | <0.001  |
| Exposed to secondary smoke (daily / rarely)                 | 1.59 (1.12, 2.23) | 0.009   |
| Alcohol consumption (drinker / never drinker)               | 0.36 (0.16, 0.72) | 0.002   |
| Alcohol consumption (drinker / ex-drinker)                  | 0.47 (0.21, 0.92) | 0.026   |
| Visits obstetrician (yes / no)                              | 0.02 (0.02, 0.03) | <0.001  |
| Positive participation of participants' partners (yes / no) | 0.25 (0.17, 0.35) | <0.001  |

AICc: 1507.8, LOF: p=1.000



1  
2  
3  
4  
5  
6  
7  
8  
9  
10  
11  
12  
13  
14  
15  
16  
17  
18  
19  
20  
21  
22  
23  
24  
25  
26  
27  
28  
29  
30  
31  
32  
33  
34  
35  
36  
37  
38  
39  
40  
41  
42  
43  
44  
45  
46  
47  
48  
49  
50  
51  
52  
53  
54  
55  
56  
57  
58  
59  
60

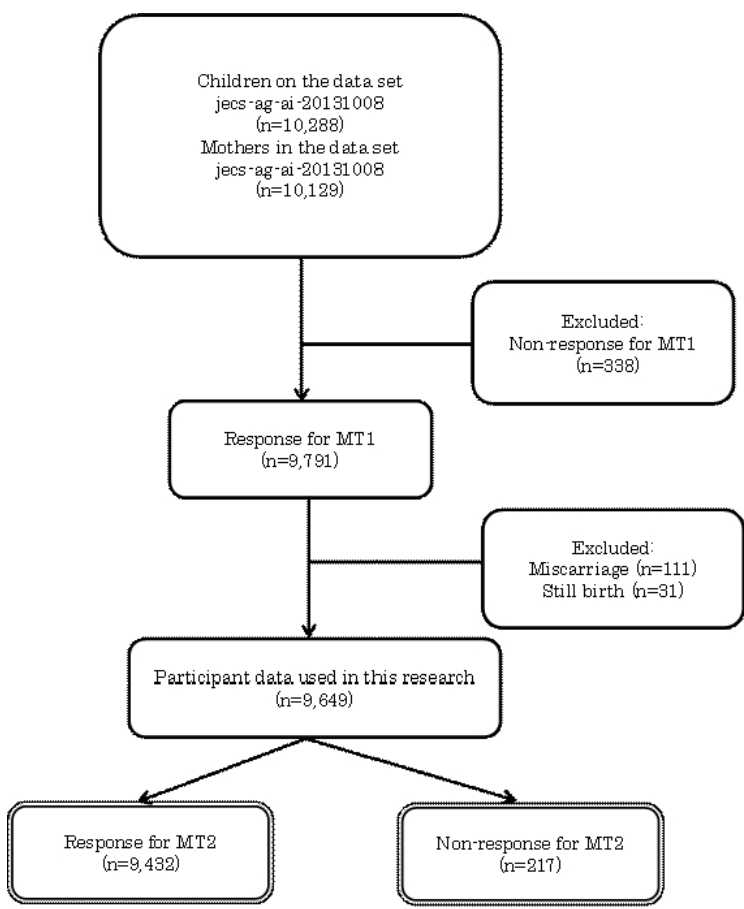

Figure 1. Inclusion of subjects (expecting mothers)

## STROBE Statement—checklist of items that should be included in reports of observational studies

|                              | Item No | Recommendation                                                                                                                                                                             | The page No   |
|------------------------------|---------|--------------------------------------------------------------------------------------------------------------------------------------------------------------------------------------------|---------------|
| <b>Title and abstract</b>    | 1       | (a) Indicate the study's design with a commonly used term in the title or the abstract                                                                                                     | p. 1          |
|                              |         | (b) Provide in the abstract an informative and balanced summary of what was done and what was found                                                                                        | p. 3          |
| <b>Introduction</b>          |         |                                                                                                                                                                                            |               |
| Background/rationale         | 2       | Explain the scientific background and rationale for the investigation being reported                                                                                                       | p.6-8         |
| Objectives                   | 3       | State specific objectives, including any prespecified hypotheses                                                                                                                           | p.8<br>1.1-4  |
| <b>Methods</b>               |         |                                                                                                                                                                                            |               |
| Study design                 | 4       | Present key elements of study design early in the paper                                                                                                                                    | p.9           |
| Setting                      | 5       | Describe the setting, locations, and relevant dates, including periods of recruitment, exposure, follow-up, and data collection                                                            | p.9-<br>10    |
| Participants                 | 6       | (a) <i>Cohort study</i> —Give the eligibility criteria, and the sources and methods of selection of participants. Describe methods of follow-up                                            | p.9<br>Fig.1  |
|                              |         | <i>Case-control study</i> —Give the eligibility criteria, and the sources and methods of case ascertainment and control selection. Give the rationale for the choice of cases and controls |               |
|                              |         | <i>Cross-sectional study</i> —Give the eligibility criteria, and the sources and methods of selection of participants                                                                      |               |
|                              |         | (b) <i>Cohort study</i> —For matched studies, give matching criteria and number of exposed and unexposed                                                                                   |               |
|                              |         | <i>Case-control study</i> —For matched studies, give matching criteria and the number of controls per case                                                                                 |               |
| Variables                    | 7       | Clearly define all outcomes, exposures, predictors, potential confounders, and effect modifiers. Give diagnostic criteria, if applicable                                                   | p.9-<br>10    |
| Data sources/<br>measurement | 8*      | For each variable of interest, give sources of data and details of methods of assessment (measurement). Describe comparability of assessment methods if there is more than one group       | p.9-<br>10    |
| Bias                         | 9       | Describe any efforts to address potential sources of bias                                                                                                                                  | p.16-<br>17   |
| Study size                   | 10      | Explain how the study size was arrived at                                                                                                                                                  | Fig.1<br>p.11 |
| Quantitative variables       | 11      | Explain how quantitative variables were handled in the analyses. If applicable, describe which groupings were chosen and why                                                               | p.9-<br>10    |
| Statistical methods          | 12      | (a) Describe all statistical methods, including those used to control for confounding                                                                                                      | P10-<br>11    |
|                              |         | (b) Describe any methods used to examine subgroups and interactions                                                                                                                        |               |
|                              |         | (c) Explain how missing data were addressed                                                                                                                                                |               |
|                              |         | (d) <i>Cohort study</i> —If applicable, explain how loss to follow-up was addressed                                                                                                        |               |
|                              |         | <i>Case-control study</i> —If applicable, explain how matching of cases and                                                                                                                |               |

1  
2  
3  
4  
5  
6  
7  
8  
9  
10  
11  
12  
13  
14  
15  
16  
17  
18  
19  
20  
21  
22  
23  
24  
25  
26  
27  
28  
29  
30  
31  
32  
33  
34  
35  
36  
37  
38  
39  
40  
41  
42  
43  
44  
45  
46  
47  
48  
49  
50  
51  
52  
53  
54  
55  
56  
57  
58  
59  
60

controls was addressed  
*Cross-sectional study*—If applicable, describe analytical methods taking  
account of sampling strategy  

---

*(e)* Describe any sensitivity analyses

Continued on next page

For peer review only

**Results**

|                  |     |                                                                                                                                                                                                                                                                                                                                                                                                               |                  |
|------------------|-----|---------------------------------------------------------------------------------------------------------------------------------------------------------------------------------------------------------------------------------------------------------------------------------------------------------------------------------------------------------------------------------------------------------------|------------------|
| Participants     | 13* | (a) Report numbers of individuals at each stage of study—eg numbers potentially eligible, examined for eligibility, confirmed eligible, included in the study, completing follow-up, and analysed<br>(b) Give reasons for non-participation at each stage<br>(c) Consider use of a flow diagram                                                                                                               | p.11             |
| Descriptive data | 14* | (a) Give characteristics of study participants (eg demographic, clinical, social) and information on exposures and potential confounders<br>(b) Indicate number of participants with missing data for each variable of interest<br>(c) <i>Cohort study</i> —Summarise follow-up time (eg, average and total amount)                                                                                           | p.11<br>Tab.1    |
| Outcome data     | 15* | <i>Cohort study</i> —Report numbers of outcome events or summary measures over time<br><i>Case-control study</i> —Report numbers in each exposure category, or summary measures of exposure<br><i>Cross-sectional study</i> —Report numbers of outcome events or summary measures                                                                                                                             | p.11-12<br>Tab.2 |
| Main results     | 16  | (a) Give unadjusted estimates and, if applicable, confounder-adjusted estimates and their precision (eg, 95% confidence interval). Make clear which confounders were adjusted for and why they were included<br>(b) Report category boundaries when continuous variables were categorized<br>(c) If relevant, consider translating estimates of relative risk into absolute risk for a meaningful time period | p.12-13<br>Tab.2 |
| Other analyses   | 17  | Report other analyses done—eg analyses of subgroups and interactions, and sensitivity analyses                                                                                                                                                                                                                                                                                                                |                  |

**Discussion**

|                  |    |                                                                                                                                                                            |         |
|------------------|----|----------------------------------------------------------------------------------------------------------------------------------------------------------------------------|---------|
| Key results      | 18 | Summarise key results with reference to study objectives                                                                                                                   | p.13    |
| Limitations      | 19 | Discuss limitations of the study, taking into account sources of potential bias or imprecision. Discuss both direction and magnitude of any potential bias                 | p.16-17 |
| Interpretation   | 20 | Give a cautious overall interpretation of results considering objectives, limitations, multiplicity of analyses, results from similar studies, and other relevant evidence | p.14-17 |
| Generalisability | 21 | Discuss the generalisability (external validity) of the study results                                                                                                      | p.17    |

**Other information**

|         |    |                                                                                                                                                               |         |
|---------|----|---------------------------------------------------------------------------------------------------------------------------------------------------------------|---------|
| Funding | 22 | Give the source of funding and the role of the funders for the present study and, if applicable, for the original study on which the present article is based | p.8, 18 |
|---------|----|---------------------------------------------------------------------------------------------------------------------------------------------------------------|---------|

\*Give information separately for cases and controls in case-control studies and, if applicable, for exposed and unexposed groups in cohort and cross-sectional studies.

**Note:** An Explanation and Elaboration article discusses each checklist item and gives methodological background and published examples of transparent reporting. The STROBE checklist is best used in conjunction with this article (freely available on the Web sites of PLoS Medicine at <http://www.plosmedicine.org/>, Annals of Internal Medicine at <http://www.annals.org/>, and Epidemiology at <http://www.epidem.com/>). Information on the STROBE Initiative is available at [www.strobe-statement.org](http://www.strobe-statement.org).

# BMJ Open

## Analysis of non-respondent pregnant women who were registered in the Japan Environment and Children's Study: a longitudinal cohort study

|                                 |                                                                                                                                                                                                                                                                                                                                                                                                                                                                                                                                                                                                                                                                                                                                                                                                                                                                                                                                                                                                                                                                                                                                                                                                                                                                                                                                                                                                                                                                                                                                                                                                                                                                                                                                         |
|---------------------------------|-----------------------------------------------------------------------------------------------------------------------------------------------------------------------------------------------------------------------------------------------------------------------------------------------------------------------------------------------------------------------------------------------------------------------------------------------------------------------------------------------------------------------------------------------------------------------------------------------------------------------------------------------------------------------------------------------------------------------------------------------------------------------------------------------------------------------------------------------------------------------------------------------------------------------------------------------------------------------------------------------------------------------------------------------------------------------------------------------------------------------------------------------------------------------------------------------------------------------------------------------------------------------------------------------------------------------------------------------------------------------------------------------------------------------------------------------------------------------------------------------------------------------------------------------------------------------------------------------------------------------------------------------------------------------------------------------------------------------------------------|
| Journal:                        | <i>BMJ Open</i>                                                                                                                                                                                                                                                                                                                                                                                                                                                                                                                                                                                                                                                                                                                                                                                                                                                                                                                                                                                                                                                                                                                                                                                                                                                                                                                                                                                                                                                                                                                                                                                                                                                                                                                         |
| Manuscript ID                   | bmjopen-2018-025562.R1                                                                                                                                                                                                                                                                                                                                                                                                                                                                                                                                                                                                                                                                                                                                                                                                                                                                                                                                                                                                                                                                                                                                                                                                                                                                                                                                                                                                                                                                                                                                                                                                                                                                                                                  |
| Article Type:                   | Research                                                                                                                                                                                                                                                                                                                                                                                                                                                                                                                                                                                                                                                                                                                                                                                                                                                                                                                                                                                                                                                                                                                                                                                                                                                                                                                                                                                                                                                                                                                                                                                                                                                                                                                                |
| Date Submitted by the Author:   | 18-Jan-2019                                                                                                                                                                                                                                                                                                                                                                                                                                                                                                                                                                                                                                                                                                                                                                                                                                                                                                                                                                                                                                                                                                                                                                                                                                                                                                                                                                                                                                                                                                                                                                                                                                                                                                                             |
| Complete List of Authors:       | <p>Kigawa, Mika; Kanagawa University of Human Services, Tsuchida, Akiko; University of Toyama Faculty of Medicine Graduate School of Medicine and Pharmaceutical Science for Education, Department of Public Health; University of Toyama Toyama Regional Center for JECS</p> <p>Miura, Kayoko; Kanazawa University Health Service Center</p> <p>Ito, Mika; University of Toyama Faculty of Medicine Graduate School of Medicine and Pharmaceutical Science for Education, Department of Obstetrics and Gynecology</p> <p>Tanaka, Tomomi; University of Toyama Toyama Regional Center for JECS; University of Toyama Faculty of Medicine Graduate School of Medicine and Pharmaceutical Science for Education, Department of Pediatrics</p> <p>Hamazaki, Kei; University of Toyama Faculty of Medicine Graduate School of Medicine and Pharmaceutical Science for Education, Department of Public Health; University of Toyama Toyama Regional Center for JECS</p> <p>Adachi, Yuichi; University of Toyama Faculty of Medicine Graduate School of Medicine and Pharmaceutical Science for Education, Department of Pediatrics</p> <p>Saito, Shigeru; University of Toyama Faculty of Medicine Graduate School of Medicine and Pharmaceutical Science for Education, Department of Obstetrics and Gynecology</p> <p>Origasa, Hideki; University of Toyama Faculty of Medicine Graduate School of Medicine and Pharmaceutical Science for Education, Department of Biostatistics and Clinical Epidemiology</p> <p>Inadera, Hidekuni; University of Toyama Faculty of Medicine Graduate School of Medicine and Pharmaceutical Science for Education, Department of Public Health; University of Toyama Toyama Regional Center for JECS</p> |
| <b>Primary Subject Heading</b>: | Epidemiology                                                                                                                                                                                                                                                                                                                                                                                                                                                                                                                                                                                                                                                                                                                                                                                                                                                                                                                                                                                                                                                                                                                                                                                                                                                                                                                                                                                                                                                                                                                                                                                                                                                                                                                            |
| Secondary Subject Heading:      | Public health, Paediatrics                                                                                                                                                                                                                                                                                                                                                                                                                                                                                                                                                                                                                                                                                                                                                                                                                                                                                                                                                                                                                                                                                                                                                                                                                                                                                                                                                                                                                                                                                                                                                                                                                                                                                                              |
| Keywords:                       | non-response, longitudinal cohort study, Pregnant women, Birth cohort study                                                                                                                                                                                                                                                                                                                                                                                                                                                                                                                                                                                                                                                                                                                                                                                                                                                                                                                                                                                                                                                                                                                                                                                                                                                                                                                                                                                                                                                                                                                                                                                                                                                             |

1  
2  
3  
4  
5  
6  
7  
8  
9  
10  
11  
12  
13  
14  
15  
16  
17  
18  
19  
20  
21  
22  
23  
24  
25  
26  
27  
28  
29  
30  
31  
32  
33  
34  
35  
36  
37  
38  
39  
40  
41  
42  
43  
44  
45  
46  
47  
48  
49  
50  
51  
52  
53  
54  
55  
56  
57  
58  
59  
60

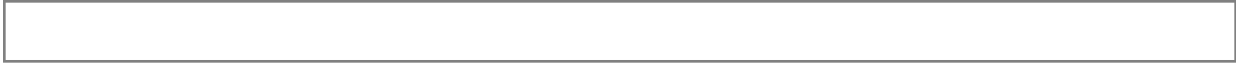

SCHOLARONE™  
Manuscripts

1  
2  
3  
4  
5  
6 Analysis of non-respondent pregnant women who were registered in the Japan  
7  
8  
9 Environment and Children's Study: a longitudinal cohort study  
10  
11  
12  
13  
14

15 Mika Kigawa<sup>1,2</sup> kigawa-c5s@kuhs.ac.jp  
16  
17  
18 Akiko Tsuchida<sup>2</sup> ecocall4@med.u-toyama.ac.jp  
19  
20  
21 Kayoko Miura<sup>3</sup> miura@staff.kanazawa-u.ac.jp  
22  
23  
24 Mika Ito<sup>4</sup> mito@med.u-toyama.ac.jp  
25  
26  
27 Tomomi Tanaka<sup>2,5</sup> tharai@med.u-toyama.ac.jp  
28  
29  
30 Kei Hamazaki<sup>1,2</sup> keihama@med.u-toyama.ac.jp  
31  
32  
33 Yuichi Adachi<sup>5</sup> yadachi@med.u-toyama.ac.jp  
34  
35  
36 Shigeru Saito<sup>4</sup> s30saito@med.u-toyama.ac.jp  
37  
38  
39 Hideki Origasa<sup>6</sup> horigasa@las.u-toyama.ac.jp  
40  
41  
42 Hidekuni Inadera<sup>1,2</sup> inadera@med.u-toyama.ac.jp  
43  
44  
45  
46  
47

48 <sup>1</sup>Department of Public Health, Faculty of Medicine, Graduate School of Medicine and  
49  
50  
51 Pharmaceutical Sciences, University of Toyama, 2630 Sugitani, Toyama, Toyama  
52  
53  
54 Prefecture 930-0194, Japan  
55

56  
57 <sup>2</sup>Toyama Regional Center for JECS, University of Toyama, 2630 Sugitani, Toyama,  
58  
59  
60

1  
2  
3  
4  
5  
6 Toyama Prefecture 930-0194, Japan  
7  
8

9 <sup>3</sup>Kanazawa University Health Service Center, Kadoma, Kanazawa city, Ishikawa  
10  
11  
12 Prefecture 920-1192, Japan  
13  
14

15 <sup>4</sup>Department of Obstetrics and Gynecology, Faculty of Medicine, Graduate School of  
16  
17  
18 Medicine and Pharmaceutical Sciences, University of Toyama, 2630 Sugitani,  
19  
20  
21 Toyama, Toyama Prefecture 930-0194, Japan  
22  
23

24 <sup>5</sup>Department of Pediatrics, Faculty of Medicine, Graduate School of Medicine and  
25  
26  
27 Pharmaceutical Sciences, University of Toyama, 2630 Sugitani, Toyama, Toyama  
28  
29  
30 Prefecture 930-0194, Japan  
31  
32

33 <sup>6</sup>Department of Biostatistics and Clinical Epidemiology, Graduate School of Medicine  
34  
35  
36 and Pharmaceutical Sciences, University of Toyama, 2630 Sugitani, Toyama, Toyama  
37  
38  
39 Prefecture 930-0194, Japan  
40  
41

42  
43  
44  
45 Corresponding author: Mika Kigawa  
46  
47  
48  
49  
50  
51  
52  
53  
54  
55  
56  
57  
58  
59  
60



## 1 Abstract

2  
3  
4  
5  
6  
7  
8  
9  
10 2 **Objectives:** Non-response to questionnaires in a longitudinal study reduces the effective  
11  
12 3 sample size and introduces bias. We identified the characteristics of non-respondent  
13  
14 4 pregnant women, and compared them with respondents in the Japan Environment and  
15  
16 5 Children's Study (JECS) during the gestational period. **Design:** This was a  
17  
18 6 questionnaire-based, longitudinal cohort study. **Setting:** Questionnaires were provided  
19  
20 7 by research coordinators to mothers at prenatal examinations (at obstetrics clinics) or by  
21  
22 8 mail. Mothers were measured twice: during the first trimester and during the  
23  
24 9 second/third trimester. **Participants:** Data were collected from the 10,129 participating  
25  
26 10 mothers of the 10,288 children surveyed in the 2011 baseline JECS. We excluded  
27  
28 11 responses from mothers who had a miscarriage or still birth; therefore, we analysed data  
29  
30 12 from 9,649 participants. **Primary and secondary outcome measures:** Data concerning  
31  
32 13 demographics, medical history, health characteristics, health-related behaviour, and  
33  
34 14 environmental exposure were collected via self-administered questionnaires. The  
35  
36 15 response status of participants' partners and contact with their obstetrician were also  
37  
38 16 examined. Multivariate logistic regression analysis was used to examine factors related  
39  
40 17 to non-response. **Results:** Response was associated with living with one's mother-in-law  
41  
42 18 (odds ratio [OR]: 0.47, 95% confidence interval [CI]: 0.24–0.85), positive participation of  
43  
44  
45  
46  
47  
48  
49  
50  
51  
52  
53  
54  
55  
56  
57  
58  
59  
60

1 participants' partner (OR: 0.25, 95% CI: 0.17–0.35), and multiple visits to the  
2 obstetrician (OR: 0.02, 95% CI: 0.02–0.03). Participants who had a medical history of  
3 allergic rhinitis, had body pain, or drank alcohol had higher odds of responding (ORs:  
4 0.68, 0.96, and 0.36, 95% CIs: 0.48–0.95, 0.95–0.98, and 0.16–0.72, respectively); those  
5 exposed to secondary smoke had lower odds of responding (OR: 1.59, 95% CI: 1.12–2.23).

6 **Conclusions:** The non-response rate decreased when participants reported health-related  
7 behaviour or characteristics. Obtaining the understanding of people around each  
8 participant might help increase response rates.

#### 9

#### 10 **Strengths and limitations of this study**

11 ▪ The Japan Environment and Children's Study (JECS) is a nationwide birth cohort  
12 study that includes 10,129 mothers with confirmed obstetric outcomes in the first year  
13 of recruitment.

14 ▪ During the gestational period, we provided self-administered questionnaires to mothers  
15 twice.

16 ▪ The study is strengthened by its assessment of the effects of non-response on prevalence  
17 estimates as well as the exposure–outcome relationship.

18 ▪ The sample size of this study was sufficient to examine the risk factors of non-response.

- 1  
2  
3  
4  
5  
6  
7 1   ▪ We were unable to examine the effects of some socioeconomic factors on non-response.  
8  
9  
10 2  
11  
12 3  
13  
14  
15  
16  
17  
18  
19  
20  
21  
22  
23  
24  
25  
26  
27  
28  
29  
30  
31  
32  
33  
34  
35  
36  
37  
38  
39  
40  
41  
42  
43  
44  
45  
46  
47  
48  
49  
50  
51  
52  
53  
54  
55  
56  
57  
58  
59  
60

For peer review only

## 1 **Background**

2 Population-based studies are used to provide epidemiological data on the occurrence  
3 of disease and to identify risk factors that may be relevant to these outcomes. The Japan  
4 Environment and Children's Study (JECS) is a nationwide birth cohort study that  
5 started recruiting expectant mothers in January 2011. [1]

6 In the first year of recruitment, approximately 10,000 registered pregnant women  
7 had confirmed obstetric outcomes. Data on participants' health-related behaviour,  
8 marital status, socioeconomic status, and education level were collected via self-  
9 administered questionnaires provided twice during the gestational period.[2]

10 In recent years, the response rates have decreased in several epidemiological studies  
11 over time, which may lead to selection biases.[3,4] Although a study may achieve a high  
12 response rate, the prevalence estimates may still be biased if the non-responses are not  
13 random. The characteristics of non-respondents therefore need to be confirmed.  
14 Systematic differences in the characteristics of respondents and non-respondents  
15 detract from the outcomes of interest. Therefore, the presence and extent of such bias  
16 should be investigated.[5] In a cross-sectional health survey, Pietila and colleagues  
17 compared the backgrounds of responding and non-responding young men and found  
18 that their socioeconomic status and education level were related to their response

1 status.[6] Furthermore, the response status in the Atherosclerosis Risk in Communities

2 Study differed according to sex and ethnicity.[7]

3 Long-term follow-up studies are hampered by a decrease in response rate due to the

4 lapse of time between birth and follow-up. A systematic review of randomized controlled

5 trials using postal questionnaires showed that the response rate was related to the

6 length and/or design of questionnaire, use of personalized letters, and follow-up contact,

7 and matched the interests of participants and originating sources.[8] In longitudinal

8 cohort studies, various factors have been shown to be related to response status,

9 including age, sex, marital status, education, health status, health-related behaviour,

10 lifestyle, ethnicity, study objectives, contact modes, number and order of contact modes,

11 and use of incentives.[9-12]

12 Some authors have suggested that non-response increases the proportion of infants

13 with adverse outcomes in the remaining study population [13]; however, how these

14 factors influence study outcomes is unclear. Therefore, we performed this study to

15 describe the characteristics of non-responders. We studied pregnant women who were

16 registered in a prospective, cohort study and who did not return the second questionnaire

17 during the gestational period.

## 1 **Methods**

### 2 **Design of the JECS**

3 In the JECS, self-administered questionnaires were provided to mothers twice:  
4 during the first trimester (MT1) and during the second/third trimester (MT2).  
5 Questionnaires were provided by research coordinators at prenatal examinations (in the  
6 obstetrics clinic) or by mail and returned either by hand at subsequent prenatal visits  
7 (in the obstetrics clinic) or by mail. The partners of registered mothers were also asked  
8 to participate. We collected data from registered partners during the women's pregnancy  
9 through self-administered questionnaires returned by hand or by mail. Women's medical  
10 records were transcribed three times, by obstetricians, midwives/nurses, or research  
11 coordinators at the obstetrics clinic: during the first trimester, during the second/third  
12 trimester, and after delivery.

### 13 **Design of the non-responder study**

14 In this study, we defined 'non-respondents' as JECS participants who did not return  
15 the questionnaire of 2<sup>nd</sup>/3<sup>rd</sup> trimesters. This study was based on a data set (i.e. jecs-ag-  
16 ai-20131008), which was released in October 2013 (The dataset supporting the  
17 conclusions of this article will be available after the steering committee of the JECS  
18 permits its accessibility). The participant flow is illustrated in Figure 1.

1 Using the MT1 questionnaire, demographic data (age, marital status, and cohabiting  
2 family members), medical and obstetric history, health-related behaviour  
3 (smoker/exposure to secondary smoke, and alcohol consumption), and occupational data  
4 were collected. The SF-8™ questionnaire (Japanese version) [14] was used to assess  
5 participants' health-related quality of life (QOL). The K6 questionnaire (Japanese  
6 version) was used to assess participants' psychological distress. [15] Age was divided into  
7 four categories: <25 years, 25–29 years, 30–34 years, and ≥35 years. We collected data of  
8 cohabiting family members via multiple-choice questionnaires.

9 The response data from participants' partners and a transcription sheet regarding  
10 health status data during the gestational period were linked with each participant.

### 11 **Definitions**

12 Health status data during pregnancy was defined as positive based on multiple visits  
13 to obstetricians and using transcription sheet data. Partners' participation status was  
14 defined as positive when partners returned the questionnaire.

15 We collected information on occupation and types of employment of participants with  
16 the MT1 questionnaire. We focused on the following settings: homemakers or  
17 unemployed, worked from home, and employed. For allocation of these settings, we used  
18 the Japan Standard Occupational Classification and the classification of positions in

1 employment by the Ministry of Internal Affairs and Communication.

2       Regarding exposure to secondary smoke before pregnancy, 'daily' was defined as  
3 when participants answered with 'exposed at least once a week'.

#### 4 **Patient and Public Involvement**

5 JECS started recruiting expectant mothers in January 2011 with the aim of assessing  
6 environmental factors that affect children's health, with the goal of providing a  
7 foundation for policymaking to safeguard the environment for the next generation. JECS  
8 study aimed to recruit approximately 100,000 pregnant women and their partners over  
9 3 years, to collect biological samples, and to collect data on their children until they  
10 turned 13 years old.[1]

11 Written informed consent for participation in JECS was obtained from individual  
12 mothers. In addition to the JECS main study, adjunct studies were conducted by the  
13 member of JECS group, or any combination of them. The adjunct studies may have  
14 included procedures that were not adopted by the main study, e.g., collection and  
15 examination of placenta. This study was one of the adjunct studies of JECS, based on an  
16 existing dataset, and hence, patients were not directly involved in the sampling process.

#### 17 **Ethical considerations**

18       The JECS protocol was reviewed and approved by the Ministry of the Environment's



1 Institutional Review Board on Epidemiological Studies and by the Ethics Committees of  
2 all participating institutions. Written informed consent was obtained from all  
3 participating women and their partners.

#### 4 **Statistical analyses**

5 The following variables were considered in the analyses for mothers: demographic  
6 data (age, marital status, and cohabiting family members), medical and obstetric history,  
7 physical and mental health, health-related behaviours, occupation, environmental  
8 exposure, contact status with their obstetrician, and partners' response status. A  
9 Student's t-test or Welch's t-test for independent groups was used for continuous  
10 variables, and a Pearson's chi-square test or Fisher's exact test was used for categorical  
11 variables. The variables that had significant associations with non-response to the MT2  
12 questionnaire in the bivariate logistic regression models were included in the  
13 multivariate models. Prevalence odds ratios and 95% confidence intervals for non-  
14 response were estimated using multivariate logistic regression analyses. The  
15 contribution of a variable to the regression model was assessed using the likelihood ratio  
16 test.

17 A significance level of .05 (two-tailed) was used for all statistical tests. JMP® Pro  
18 version 11 (SAS Institute Inc., Cary, NC, USA) was used for all statistical analyses.

1  
2  
3  
4  
5  
6  
7  
8  
9  
10  
11  
12  
13  
14  
15  
16  
17  
18  
19  
20  
21  
22  
23  
24  
25  
26  
27  
28  
29  
30  
31  
32  
33  
34  
35  
36  
37  
38  
39  
40  
41  
42  
43  
44  
45  
46  
47  
48  
49  
50  
51  
52  
53  
54  
55  
56  
57  
58  
59  
60

## 1 Results

2 The overall response rate to the questionnaire in the second/third trimester was  
3 97.7% (9432/9649). Table 1 shows participants' characteristics at the first trimester,  
4 their partners' participating status, and visits to the obstetrician among responders and  
5 non-responders. The proportions of marital status, family members, medical history,  
6 exposure to secondary smoke, and job status significantly differed between responders  
7 and non-responders. The responders were more likely to be married, living with in-laws,  
8 have a history of allergic rhinitis or allergic conjunctivitis, have better physical  
9 functioning, have a high response rate from their partner, and make more visits to the  
10 obstetrician. Additionally, responders were less likely to have a history of migraines or  
11 polycystic ovary syndrome than were non-responders. Non-responders were more likely  
12 to have been exposed to secondary smoke than were responders. Participants who were  
13 employed were more likely to respond than were their counterparts. The SF-8 Physical  
14 Functioning and Body Pain scales were significantly higher for responders than for non-  
15 responders.

16 Two variables showed significant associations—living with one's mother-in-law and  
17 having allergic rhinitis—with non-response according to the bivariate logistic regression

1  
2  
3  
4  
5  
6 1 model. Table 2 shows the odds ratios for non-response according to the various  
7  
8  
9 2 demographic and clinical characteristics, partners' participation status, and visiting  
10  
11  
12 3 obstetricians in the multivariate logistic regression analyses. Model 1 included the  
13  
14  
15 4 variables that had significant associations with non-response of MT2.  
16  
17

18 5 The odds of non-response were lower in participants who had a medical history of  
19  
20  
21 6 allergies, which is one of the priority outcomes of the JECS[1]; had a positive QOL; were  
22  
23  
24 7 living with their mother-in-law; had partners who actively participated; and had  
25  
26  
27 8 maintained contact with obstetricians. However, the odds of non-response were higher  
28  
29  
30 9 in participants who had been exposed to secondary smoke. Marital status, job site, and  
31  
32  
33 10 the SF-8 physical functioning scale did not match the model, and thus were excluded.  
34  
35

36 11 Model 2 excluded variables that did not show significance in Model 1. The odds of  
37  
38  
39 12 non-response were higher in participants who had been exposed to secondary smoke;  
40  
41  
42 13 however, the odds were lower in participants who lived with their mother-in-law, had a  
43  
44  
45 14 history of allergic rhinitis, had a positive QOL regarding body pain, had partners who  
46  
47  
48 15 participated, and visited the obstetrician.  
49  
50  
51  
52  
53

## 54 16 Discussion

55  
56  
57 17 Using data collected during pregnancy, we evaluated non-response bias in  
58  
59  
60

1 approximately 10,000 pregnant women who participated in the JECS. Many factors were  
2 independently associated with response to the follow-up questionnaire. The  
3 characteristics associated with a greater probability of response included being married,  
4 living with one's mother-in-law, and where the participants worked. Having a medical  
5 history of allergic rhinitis or allergic conjunctivitis resulted in a higher probability of  
6 response. The number of partners with positive participation in the JECS and multiple  
7 visits to the obstetrician were significantly lower in non-responders than in responders.

8 The odds ratios for non-response were correlated with demographic and clinical  
9 characteristics, partners' participation status, and visiting the obstetrician in the  
10 multivariate logistic regression analysis. Specifically, the odds of non-response were  
11 lower in participants who had a medical history of allergies, which is one of the priority  
12 outcomes of the JECS; who had a positive QOL; who were living with their mother-in-  
13 law; whose partners participated; and who maintained contact with obstetricians. The  
14 odds of non-response were higher in participants who had been exposed to secondary  
15 smoke. Baron and colleagues reported that passive smoking showed disparity across  
16 educational levels.[16] We could not consider the effects of education; however, the  
17 relationship between non-response and exposure to secondary smoke might be affected  
18 by participants' education.

1  
2  
3  
4  
5  
6  
7 1 One of the objectives of the JECS was to assess environmental factors that affect  
8  
9 2 children's health (e.g. allergic diseases). The prevalence of allergic rhinitis in the  
10  
11  
12 3 Japanese population was 44.2% in 2006–2007 [17] and that of allergic conjunctivitis  
13  
14  
15 4 disease was 14.8% in 1993. [18] Both were higher than those reported in the current  
16  
17  
18 5 study (35.9% and 10.9%, respectively). Macera and colleagues reported that responders  
19  
20  
21 6 were individuals who had family members with certain chronic conditions in their  
22  
23  
24 7 health-related survey. [19] Leadbetter and colleagues examined the perceived risk of  
25  
26  
27 8 cancer by comparing early and late responders. They reported that the salience of the  
28  
29  
30 9 survey topic was associated with a prompt response. [20] In this survey, participants  
31  
32  
33 10 with interest in children's allergic diseases were more likely to respond; however, daily  
34  
35  
36 11 exposure to secondary smoke made non-responses more likely. In health-related surveys,  
37  
38  
39 12 participants with risky health behaviours are more likely to be non-respondents than  
40  
41  
42 13 are those who exhibit healthier behaviour. [21]

45 14 Etter and colleagues reported that respondents had better general health than did  
46  
47  
48 15 non-respondents.[22] Martikainen and colleagues evaluated non-response bias in  
49  
50  
51 16 analyses of social class inequalities in health.[23] They found that female non-  
52  
53  
54 17 respondents had an approximately 20–30% higher sickness absence rate per 100 person-  
55  
56  
57 18 years than did respondents. Our results from the Body Pain scale showed that

1 respondents were healthier than were non-respondents, which is consistent with these  
2 previous results. The response rate was higher among participants who lived with their  
3 mother-in-law, those who had partners who positively participated, and those who  
4 maintained contact with an obstetrician. Alessi and colleagues suggested that general  
5 practitioners' understanding of the study could influence the attitude of their patients.  
6 [24] Our results indicate that the same is true for people close to the participants. Hatta  
7 and colleagues reported that parents-in-law were perceived as the least cohesive persons  
8 among close family members in Japan. [25] Another study of postpartum depression in  
9 China reported that the underlying cultural setting of the daughter-in-law/mother-in-  
10 law relationship contributed to depression among daughters-in-law. [26] In our survey,  
11 the presence of a mother-in-law may have acted as a stressor to motivate the participants  
12 to return the questionnaires. Further, we collected participants' job status and  
13 categorized it into three modes: homemakers or unemployed, worked from home, and  
14 employed. The response rate depended on participants' job, with a higher response rate  
15 being found among participants working from home than among those whose job location  
16 was outside of their home. In the Survey on Time Use and Leisure Activities in 2011,[27]  
17 women who worked from home (family workers) spent more time on housework and less  
18 time on self-education/training and hobbies/amusement than did those who were

1 employed outside of their home. Associations with response to the questionnaire were  
2 also observed for job location and time spent answering the questionnaire; however,  
3 these relationships were weak.

4 The limitations of this study are as follows: 1) a lack of information on education level  
5 and participants' socioeconomic status, 2) a lack of information on the survey mode, and  
6 3) a lack of information on partners' registration status. However, we know that  
7 socioeconomic status and education level are related to response status. [6,28-30]  
8 Although we collected socioeconomic and educational data on the MT2 questionnaire, we  
9 failed to consider these effects because they were beyond the scope of our objectives. In  
10 particular, it seems that the investigators' interpretation of 'secondary smoke' was  
11 inconsistent with their results regarding alcohol consumption or health-related variables.  
12 These variables were related to socioeconomic and education status. In addition, several  
13 researchers have reported that response status differs according to survey mode.[31-34]  
14 In this study, we collected questionnaires by hand or by mail. Because we were unable  
15 to collect data on the mode used, we did not evaluate the effect of these distinct modes.  
16 We were also unable to collect information regarding the extent of partners'  
17 participation—any response was considered positive. Finally, we could not confirm  
18 participants' medical or obstetric history using clinical data. Relying solely on data

1  
2  
3  
4  
5  
6  
7  
8  
9  
10  
11  
12  
13  
14  
15  
16  
17  
18  
19  
20  
21  
22  
23  
24  
25  
26  
27  
28  
29  
30  
31  
32  
33  
34  
35  
36  
37  
38  
39  
40  
41  
42  
43  
44  
45  
46  
47  
48  
49  
50  
51  
52  
53  
54  
55  
56  
57  
58  
59  
60

1 collected by self-administered questionnaires introduces the risk of response bias.

## 2 **Conclusions**

3 In conclusion, this study showed that obtaining understanding of the research  
4 objectives from people who are close to the participants was associated with a higher  
5 odds of response. To reduce the non-response rate in future follow-up surveys, additional  
6 efforts should be made to maintain contact and encourage participation among  
7 individuals who display relevant characteristics of potential non-responders. Because  
8 the data collected from pregnant women participating in JECS were used in this study,  
9 it means the participants may have been influenced by the Japanese culture and/or their  
10 socioeconomic situation. It is necessary to consider the results obtained from other  
11 participants from different cultures or nationalities.

## 12 **Declarations**

### 13 **Data sharing statement**

14 The dataset supporting the conclusions of this article will be available after the  
15 steering committee of the JECS allows it to become available.

16 The dataset supporting the conclusions of this article is unsuitable for public  
17 deposition due to ethical restrictions and legal framework of Japan. The Act on the



1  
2  
3  
4  
5  
6  
7 1 Protection of Personal Information (Act No. 57 of 30 May 2003; amendment on 9  
8  
9 2 September 2015) prohibits publicly depositing data containing personal information. The  
10  
11  
12 3 Ethical Guidelines for Medical and Health Research Involving Human Subjects, which  
13  
14  
15 4 are enforced by the Japan Ministry of Education, Culture, Sports, Science and  
16  
17  
18 5 Technology and the Ministry of Health, Labour and Welfare, also restrict the open  
19  
20  
21 6 sharing of epidemiologic data. All inquiries about access to these data should be sent to  
22  
23  
24 7 Dr Shoji F. Nakayama, JECS Programme Office, National Institute for Environmental  
25  
26  
27 8 Studies; email: jecs-en@nies.go.jp.

### 9 **Competing interests**

10 The authors declare that they have no competing interests.

### 11 **Funding**

12 The Japan Environment and Children's Study was supported by the Ministry of the  
13 Environment, Japan. The findings and conclusions of this article are solely the  
14 responsibility of the authors and do not represent the official views of the above-  
15 mentioned government.

### 16 **Authors' contributions**

17 MK designed and conducted the study, performed the statistical analyses, and wrote  
18 the manuscript. KM helped draft the manuscript. AT conducted the data collection and

1 helped draft the manuscript. MI and TT conducted data collection and helped critically  
2 revise the manuscript. KH and HI participated in the study design and helped critically  
3 revise the manuscript. HO assisted with the statistical analyses. YA and SS helped  
4 critically revise the manuscript. All authors have read and approved the final  
5 manuscript.

## 6 **Figure legend**

7 Figure 1. Participant (expecting mothers) flow

## 8 **Acknowledgements**

9 We thank all members of the JECS as of 2015: Toshihiro Kawamoto (principal  
10 investigator), Hirohisa Saito (Medical Support Center for the JECS, National Center for  
11 Child Health and Development, Tokyo, Japan), Reiko Kishi (Hokkaido Regional Center  
12 for the JECS, Hokkaido University, Sapporo, Japan), Nobuo Yaegashi (Miyagi Regional  
13 Center for the JECS, Tohoku University, Sendai, Japan), Koichi Hashimoto (Fukushima  
14 Regional Center for the JECS, Fukushima Medical University, Fukushima, Japan),  
15 Chisato Mori (Chiba Regional Center for the JECS, Chiba University, Chiba, Japan),  
16 Fumiki Hirahara (Kanagawa Regional Center for the JECS, Yokohama City University,  
17 Yokohama, Japan), Zentaro Yamagata (Koshin Regional Center for the JECS,  
18 University of Yamanashi, Chuo, Japan), Hidekuni Inadera (Toyama Regional Center for

- 1 the JECS, University of Toyama, Toyama, Japan), Michihiro Kamijima (Aichi Regional
- 2 Center for the JECS, Nagoya City University, Nagoya, Japan), Ikuo Konishi (Kyoto
- 3 Regional Center for the JECS, Kyoto University, Kyoto, Japan), Hiroyasu Iso (Osaka
- 4 Regional Center for the JECS, Osaka University, Suita, Japan), Masayuki Shima (Hyogo
- 5 Regional Center for the JECS, Hyogo College of Medicine, Nishinomiya, Japan),
- 6 Toshihide Ogawa (Tottori Regional Center for the JECS, Tottori University, Yonago,
- 7 Japan), Narufumi Suganuma (Kochi Regional Center for the JECS, Kochi University,
- 8 Nankoku, Japan), Koichi Kusuhara (Fukuoka Regional Center for the JECS, University
- 9 of Occupational and Environmental Health, Kitakyushu, Japan), and Takahiko Katoh
- 10 (South Kyushu/Okinawa Regional Center for the JECS, Kumamoto University,
- 11 Kumamoto, Japan).

## References

1. Kawamoto T, Nitta H, Murata K, *et al.* Rationale and study design of the Japan environment and children's study (JECS). *BMC Public Health* 2014;14:25.
2. Michikawa T, Nitta H, Nakayama SF, *et al.* The Japan Environment and Children's Study (JECS): A preliminary report on selected characteristics of approximately 10 000 pregnant women recruited during the first year of the study. *J Epidemiol* 2015;25(6):452–458.
3. Christensen AI, Ekholm O, Gray L, *et al.* What is wrong with non-respondents? Alcohol-, drug- and smoking-related mortality and morbidity in a 12-year follow-up study of respondents and non-respondents in the Danish Health and Morbidity Survey. *Addiction* 2015;110(9):1505–12.
4. Schneider KL, Clark MA, Rakowski W, *et al.* Evaluating the impact of non-response bias in the Behavioral Risk Factor Surveillance System (BRFSS). *J Epidemiol Community Health* 2012;66(4):290–5.
5. Stang A. Nonresponse research—an underdeveloped field in epidemiology. *Eur J Epidemiol* 2003;18(10):929–31.
6. Pietilä AM, Rantakallio P, Laara E. Background factors predicting non-response in a health survey of northern Finnish young men. *Scand J Soc Med* 1995;23(2):129–36.
7. Jackson R, Chambless LE, Yang K, *et al.* Differences between respondents and nonrespondents in a multicenter community-based study vary by gender ethnicity. The Atherosclerosis Risk in Communities (ARIC) Study Investigators. *J Clin Epidemiol* 1996;49(12):1441–6.
8. Edwards P, Roberts I, Clarke M, *et al.* Increasing response rates to postal questionnaires: Systematic review. *BMJ* 2002;324(7347):1183.
9. Young AF, Powers JR, Bell SL. Attrition in longitudinal studies: Who do you lose? *Aust NZ J Public Health* 2006;30(4):353–61.
10. Powers J, Loxton D. The impact of attrition in an 11-year prospective longitudinal study of younger women. *Ann Epidemiol* 2010;20(4):318–21.
11. Launes J, Hokkanen L, Laasonen M, *et al.* Attrition in a 30-year follow-up of a perinatal birth risk cohort: Factors change with age. *PeerJ* 2014;2:e480.
12. Sheikh K, Mattingly S. Investigating non-response bias in mail surveys. *J Epidemiol Community Health* 1981;35(4):293–6.
13. Wolke D, Sohne B, Ohrt B, *et al.* Follow-up of preterm children: Important to document dropouts. *Lancet* 1995;345(8947):447.
14. Fukuhara S, Suzukamo Y. Manual of the SF-8 Japanese version. Kyoto, Japan:

- 1  
2  
3  
4  
5  
6 1 Institute for Health Outcomes & Process Evaluation Research. 2004.
- 7 2 15. Furukawa TA, Kawakami N, Saitoh M, et al. The performance of the Japanese  
8 3 version of the K6 and K10 in the World Mental Health Survey Japan. *Int J Methods*  
9 4 *Psychiatr Res* 2008;17(3):152–8.
- 10 5 16. Baron R, Mannien J, te Velde SJ, et al. Socio-demographic inequalities across a range  
11 6 of health status indicators and health behaviours among pregnant women in prenatal  
12 7 primary care: a cross-sectional study. *BMC Pregnancy Childbirth* 2015;15:261.
- 13 8 17. Sakashita M, Hirota T, Harada M, et al. Prevalence of allergic rhinitis and  
14 9 sensitization to common aeroallergens in a Japanese population. *Int Arch Allergy*  
15 10 *Immunol* 2010;151(3):255–61.
- 16 11 18. Fernandez C. Ethical issues in health research in children. *Paediatr Child Health*  
17 12 2008;13(8):707–12.
- 18 13 19. Macera CA, Jackson KL, Davis DR, et al. Patterns of non-response to a mail survey.  
19 14 *J Clin Epidemiol* 1990;43(12):1427–30.
- 20 15 20. Leadbetter S, Hawkins NA, Scholl LE, et al. Recruiting women for a study on  
21 16 perceived risk of cancer: influence of survey topic salience and early versus late  
22 17 response. *Prev Chronic Dis* 2013;10:E75.
- 23 18 21. Goldberg M, Chastang JF, Zins M, et al. Health problems were the strongest  
24 19 predictors of attrition during follow-up of the GAZEL cohort. *J Clin Epidemiol*  
25 20 2006;59(11):1213–21.
- 26 21 22. Etter JF, Perneger TV. Analysis of non-response bias in a mailed health survey. *J*  
27 22 *Clin Epidemiol* 1997;50(10):1123–8.
- 28 23 23. Martikainen P, Laaksonen M, Piha K, et al. Does survey non-response bias the  
29 24 association between occupational social class and health? *Scand J Public Health*  
30 25 2007;35(2):212–5.
- 31 26 24. Alessi D, Pastore G, Zuccolo L, et al. Analysis of nonresponse in the assessment of  
32 27 health-related quality of life of childhood cancer survivors. *Eur J Cancer Prev*  
33 28 2007;16(6):576–80.
- 34 29 25. Hatta T, Kadobayashi S, Iwamoto T, et al. Interpersonal constructs of pregnant  
35 30 married women during pregnancy and postpartum period as perceptions of family  
36 31 members. *Percept Mot Skills* 2000;91(3 Pt 1):789–99.
- 37 32 26. Gao LL, Chan SW, You L, et al. Experiences of postpartum depression among first-  
38 33 time mothers in mainland China. *J Adv Nurs* 2010;66(2):303–12.
- 39 34 27. Statistics Bureau, Ministry of Internal Affairs. Survey on time use and leisure  
40 35 activities. In., 2013/4/1 edn; 2013.
- 41 36 28. Helasoja V, Prattala R, Dregval L, et al. Late response and item nonresponse in the  
42  
43  
44  
45  
46  
47  
48  
49  
50  
51  
52  
53  
54  
55  
56  
57  
58  
59  
60

1  
2  
3  
4  
5  
6  
7  
8  
9  
10  
11  
12  
13  
14  
15  
16  
17  
18  
19  
20  
21  
22  
23  
24  
25  
26  
27  
28  
29  
30  
31  
32  
33  
34  
35  
36  
37  
38  
39  
40  
41  
42  
43  
44  
45  
46  
47  
48  
49  
50  
51  
52  
53  
54  
55  
56  
57  
58  
59  
60

- 1 Finbalt Health Monitor survey. *Eur J Public Health* 2002;12(2):117–23.
- 2 29. Tolonen H, Laatikainen T, Helakorpi S, et al. Marital status, educational level and  
3 household income explain part of the excess mortality of survey non-respondents. *Eur*  
4 *J Epidemiol* 2010;25(2):69–76.
- 5 30. Secor-Turner M, Sieving R, Widome R, et al. Active parent consent for health surveys  
6 with urban middle school students: Processes and outcomes. *J School Health*  
7 2010;80(2):73–9.
- 8 31. Bongers IMB, Van Oers JAM. Mode effects on self-reported alcohol use and problem  
9 drinking: Mail questionnaires and personal interviewing compared. *J Stud Alcohol*  
10 1998;59(3):280–5.
- 11 32. Tse A, Ching R, Ding YB, et al. A comparison of the effectiveness of mail and facsimile  
12 as survey media on response rate, speed and quality. *J Market Res Soc*  
13 1994;36(4):349–55.
- 14 33. Aquilino WS. Telephone versus face-to-face interviewing for household drug use  
15 surveys. *Int J Addict* 1992;27(1):71–91.
- 16 34. Picavet HSJ. National health surveys by mail or home interview: Effects on response.  
17 *J Epidemiol Community Health* 2001;55(6):408–13.

1 Table 1. Baseline characteristics of sample

|                                                          | Responder<br>(n=9,432) | Non-responder<br>(n= 217) | p value |
|----------------------------------------------------------|------------------------|---------------------------|---------|
| Age                                                      |                        |                           | 0.205   |
| < 25                                                     | 9.1                    | 10.4                      |         |
| 25 – 29                                                  | 27.3                   | 24.2                      |         |
| 30 – 34                                                  | 35.8                   | 42.3                      |         |
| >= 35                                                    | 27.8                   | 23.1                      |         |
| Marital status                                           |                        |                           | 0.024   |
| Married                                                  | 95.8                   | 93.9                      |         |
| Unmarried                                                | 3.2                    | 3.3                       |         |
| Divorced/widowed                                         | 1.0                    | 2.8                       |         |
| Family member participants living with                   |                        |                           |         |
| None                                                     | 0.7                    | 0.9                       | 0.661*  |
| Partner                                                  | 93.0                   | 91.7                      | 0.471   |
| Children                                                 | 55.3                   | 54.8                      | 0.892   |
| Father                                                   | 7.6                    | 5.5                       | 0.298*  |
| Mother                                                   | 9.9                    | 8.8                       | 0.646*  |
| Brother / sister                                         | 4.2                    | 5.9                       | 0.218   |
| Father-in-law                                            | 9.4                    | 5.5                       | 0.045*  |
| Mother-in-law                                            | 11.6                   | 5.5                       | 0.005*  |
| Brother / sister-in-law                                  | 3.1                    | 0.9                       | 0.071*  |
| 1 <sup>st</sup> pregnancy                                | 30.5                   | 31.0                      | 0.940*  |
| Medical history                                          |                        |                           |         |
| Have allergic rhinitis                                   | 35.9                   | 26.7                      | 0.005*  |
| Have allergic conjunctivitis                             | 10.9                   | 6.4                       | 0.035*  |
| Smoking habits during early pregnancy                    |                        |                           | 0.072   |
| Never smoked                                             | 56.8                   | 50.0                      |         |
| Ex-smokers who quit before pregnancy                     | 24.2                   | 25.2                      |         |
| Ex-smokers who quit after pregnancy                      | 13.5                   | 15.9                      |         |
| Smoker                                                   | 5.5                    | 8.9                       |         |
| Exposed to secondary smoke before pregnancy <sup>a</sup> |                        |                           | < 0.001 |
| Rarely                                                   | 80.2                   | 71.0                      |         |
| Daily                                                    | 19.8                   | 29.0                      |         |
| Alcohol consumption during early pregnancy               |                        |                           | 0.006*  |

|                                                 |           |           |                    |
|-------------------------------------------------|-----------|-----------|--------------------|
| Never drinker                                   | 35.0      | 40.4      |                    |
| Ex-drinkers                                     | 55.0      | 55.4      |                    |
| Drinkers                                        | 10.0      | 4.2       |                    |
| Job site of participants                        |           |           | 0.011              |
| Housewife / unemployed                          | 42.2      | 52.2      |                    |
| Work from home                                  | 3.4       | 3.9       |                    |
| Employed                                        | 54.4      | 43.9      |                    |
| Relationship with others                        |           |           |                    |
| Visits obstetrician <sup>b</sup>                | 97.8      | 54.3      | < 0.001*           |
| Positive participation of partners <sup>c</sup> | 60.4      | 23.9      | < 0.001*           |
|                                                 | Mean, SE  | Mean, SE  | p value            |
| No. of household member                         | 3.3, 0.01 | 3.1, 0.09 | 0.094 <sup>+</sup> |
| Health Related Quality of Life (SF-8)           |           |           |                    |
| General Health                                  | 46.9, 0.1 | 46.7, 0.5 | 0.772              |
| Physical Functioning                            | 46.6, 0.1 | 45.5, 0.5 | 0.027              |
| Role Physical                                   | 43.7, 0.1 | 43.5, 0.6 | 0.756              |
| Body Pain                                       | 50.0, 0.1 | 48.7, 0.6 | 0.025              |
| Vitality                                        | 47.5, 0.1 | 47.2, 0.5 | 0.452              |
| Social Functioning                              | 44.2, 0.1 | 43.4, 0.6 | 0.203              |
| Mental Health                                   | 47.0, 0.1 | 46.2, 0.5 | 0.062              |
| Role Emotional                                  | 47.2, 0.1 | 46.5, 0.5 | 0.198              |
| Physical Component Summary                      | 45.5, 0.1 | 44.8, 0.5 | 0.203              |
| Mental Component Summary                        | 46.3, 0.1 | 45.6, 0.5 | 0.164              |
| Self-Administered mental health (K6)            | 9.6, 0.0  | 10.1, 0.3 | 0.097 <sup>+</sup> |

\*: Fisher's exact test, +: Welch's t test

a: 'Daily' defined as subjects exposed at least once a week.

b: Participants who collected the transcription sheet defined as multiple visits with obstetrician.

c: Positive participation of partner was those who answered the questionnaire.



1 Table 2. (a) Multivariate Logistic Regression Predicting the likelihood of Survey Non-  
 2 response: model 1

| Variable                                                           | OR (95% CI)       | p value |
|--------------------------------------------------------------------|-------------------|---------|
| Marital status                                                     |                   |         |
| Married                                                            | Reference         |         |
| Unmarried                                                          | 0.64 (0.23, 1.48) | 0.324   |
| Divorced/widowed                                                   | 1.22 (0.28, 3.52) | 0.750   |
| Living with mother-in-law (yes / no)                               | 0.50 (0.25, 0.90) | 0.020   |
| Job site of participants                                           |                   |         |
| Housewife or unemployed                                            | Reference         |         |
| Work from home                                                     | 1.58 (0.67, 3.26) | 0.173   |
| Employed                                                           | 0.86 (0.62, 1.19) | 0.107   |
| Medical history of allergic rhinitis (yes / no)                    | 0.62 (0.43, 0.88) | 0.007   |
| Health Related Quality of Life (Physical Functioning)              | 0.98 (0.96, 1.00) | 0.135   |
| Health Related Quality of Life (Body Pain)                         | 0.97 (0.95, 0.98) | 0.002   |
| Exposed to secondary smoke during early pregnancy (daily / rarely) | 1.48 (1.03, 2.11) | 0.034   |
| Alcohol consumption                                                |                   |         |
| Drinker during early pregnancy / never drunk                       | 0.34 (0.14, 0.71) | 0.002   |
| Drinker during early pregnancy / ex-drinkers                       | 0.45 (0.19, 0.92) | 0.027   |
| Relationship with others                                           |                   |         |
| Visits to obstetrician (yes / no)                                  | 0.02 (0.02, 0.04) | <0.001  |
| Positive participation of partners (yes / no)                      | 0.26 (0.18, 0.36) | <0.001  |

3 For this model, data of 9,298 people were used.

4 AICc: 1427.9, LOF: p=1.000

5

1 Table 2. (b) Multivariate Logistic Regression Predicting the likelihood of Survey Non-  
 2 response: model 2

| Variable                                                    | OR (95% CI)       | p value |
|-------------------------------------------------------------|-------------------|---------|
| Living with mother-in-law (yes / no)                        | 0.47 (0.24, 0.85) | 0.011   |
| Having history of allergic rhinitis (yes / no)              | 0.68 (0.48, 0.95) | 0.024   |
| Health Related Quality of Life (Body Pain)                  | 0.96 (0.95, 0.98) | <0.001  |
| Exposed to secondary smoke (daily / rarely)                 | 1.59 (1.12, 2.23) | 0.009   |
| Alcohol consumption (drinker / never drinker)               | 0.36 (0.16, 0.72) | 0.002   |
| Alcohol consumption (drinker / ex-drinker)                  | 0.47 (0.21, 0.92) | 0.026   |
| Visits obstetrician (yes / no)                              | 0.02 (0.02, 0.03) | <0.001  |
| Positive participation of participants' partners (yes / no) | 0.25 (0.17, 0.35) | <0.001  |

3 For this analysis, data of 9,634 people were used.

4 AICc: 1507.8, LOF: p=1.000

5

6

7

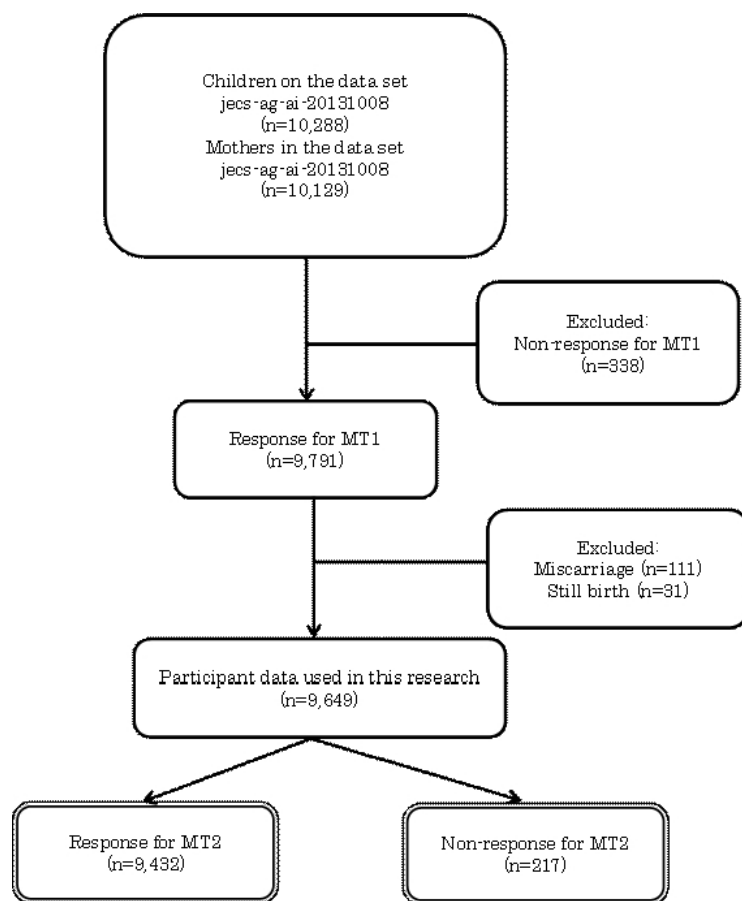

Figure 1. Inclusion of subjects (expecting mothers)

## STROBE Statement—checklist of items that should be included in reports of observational studies

|                              | Item No | Recommendation                                                                                                                                                                             | The page No   |
|------------------------------|---------|--------------------------------------------------------------------------------------------------------------------------------------------------------------------------------------------|---------------|
| <b>Title and abstract</b>    | 1       | (a) Indicate the study's design with a commonly used term in the title or the abstract                                                                                                     | p. 1          |
|                              |         | (b) Provide in the abstract an informative and balanced summary of what was done and what was found                                                                                        | p. 3          |
| <b>Introduction</b>          |         |                                                                                                                                                                                            |               |
| Background/rationale         | 2       | Explain the scientific background and rationale for the investigation being reported                                                                                                       | p.6-8         |
| Objectives                   | 3       | State specific objectives, including any prespecified hypotheses                                                                                                                           | p.8<br>1.1-4  |
| <b>Methods</b>               |         |                                                                                                                                                                                            |               |
| Study design                 | 4       | Present key elements of study design early in the paper                                                                                                                                    | p.9           |
| Setting                      | 5       | Describe the setting, locations, and relevant dates, including periods of recruitment, exposure, follow-up, and data collection                                                            | p.9-<br>10    |
| Participants                 | 6       | (a) <i>Cohort study</i> —Give the eligibility criteria, and the sources and methods of selection of participants. Describe methods of follow-up                                            | p.9<br>Fig.1  |
|                              |         | <i>Case-control study</i> —Give the eligibility criteria, and the sources and methods of case ascertainment and control selection. Give the rationale for the choice of cases and controls |               |
|                              |         | <i>Cross-sectional study</i> —Give the eligibility criteria, and the sources and methods of selection of participants                                                                      |               |
|                              |         | (b) <i>Cohort study</i> —For matched studies, give matching criteria and number of exposed and unexposed                                                                                   |               |
|                              |         | <i>Case-control study</i> —For matched studies, give matching criteria and the number of controls per case                                                                                 |               |
| Variables                    | 7       | Clearly define all outcomes, exposures, predictors, potential confounders, and effect modifiers. Give diagnostic criteria, if applicable                                                   | p.9-<br>10    |
| Data sources/<br>measurement | 8*      | For each variable of interest, give sources of data and details of methods of assessment (measurement). Describe comparability of assessment methods if there is more than one group       | p.9-<br>10    |
| Bias                         | 9       | Describe any efforts to address potential sources of bias                                                                                                                                  | p.16-<br>17   |
| Study size                   | 10      | Explain how the study size was arrived at                                                                                                                                                  | Fig.1<br>p.11 |
| Quantitative variables       | 11      | Explain how quantitative variables were handled in the analyses. If applicable, describe which groupings were chosen and why                                                               | p.9-<br>10    |
| Statistical methods          | 12      | (a) Describe all statistical methods, including those used to control for confounding                                                                                                      | P10-<br>11    |
|                              |         | (b) Describe any methods used to examine subgroups and interactions                                                                                                                        |               |
|                              |         | (c) Explain how missing data were addressed                                                                                                                                                |               |
|                              |         | (d) <i>Cohort study</i> —If applicable, explain how loss to follow-up was addressed                                                                                                        |               |
|                              |         | <i>Case-control study</i> —If applicable, explain how matching of cases and                                                                                                                |               |

1  
2 controls was addressed

3 *Cross-sectional study*—If applicable, describe analytical methods taking  
4 account of sampling strategy

---

5 (e) Describe any sensitivity analyses

6  
7 Continued on next page

8  
9  
10  
11  
12  
13  
14  
15  
16  
17  
18  
19  
20  
21  
22  
23  
24  
25  
26  
27  
28  
29  
30  
31  
32  
33  
34  
35  
36  
37  
38  
39  
40  
41  
42  
43  
44  
45  
46  
47  
48  
49  
50  
51  
52  
53  
54  
55  
56  
57  
58  
59  
60

For peer review only

**Results**

|                  |     |                                                                                                                                                                                                                                                                                                                                                                                                               |                  |
|------------------|-----|---------------------------------------------------------------------------------------------------------------------------------------------------------------------------------------------------------------------------------------------------------------------------------------------------------------------------------------------------------------------------------------------------------------|------------------|
| Participants     | 13* | (a) Report numbers of individuals at each stage of study—eg numbers potentially eligible, examined for eligibility, confirmed eligible, included in the study, completing follow-up, and analysed<br>(b) Give reasons for non-participation at each stage<br>(c) Consider use of a flow diagram                                                                                                               | p.11             |
| Descriptive data | 14* | (a) Give characteristics of study participants (eg demographic, clinical, social) and information on exposures and potential confounders<br>(b) Indicate number of participants with missing data for each variable of interest<br>(c) <i>Cohort study</i> —Summarise follow-up time (eg, average and total amount)                                                                                           | p.11<br>Tab.1    |
| Outcome data     | 15* | <i>Cohort study</i> —Report numbers of outcome events or summary measures over time<br><i>Case-control study</i> —Report numbers in each exposure category, or summary measures of exposure<br><i>Cross-sectional study</i> —Report numbers of outcome events or summary measures                                                                                                                             | p.11-12<br>Tab.2 |
| Main results     | 16  | (a) Give unadjusted estimates and, if applicable, confounder-adjusted estimates and their precision (eg, 95% confidence interval). Make clear which confounders were adjusted for and why they were included<br>(b) Report category boundaries when continuous variables were categorized<br>(c) If relevant, consider translating estimates of relative risk into absolute risk for a meaningful time period | p.12-13<br>Tab.2 |
| Other analyses   | 17  | Report other analyses done—eg analyses of subgroups and interactions, and sensitivity analyses                                                                                                                                                                                                                                                                                                                |                  |

**Discussion**

|                  |    |                                                                                                                                                                            |         |
|------------------|----|----------------------------------------------------------------------------------------------------------------------------------------------------------------------------|---------|
| Key results      | 18 | Summarise key results with reference to study objectives                                                                                                                   | p.13    |
| Limitations      | 19 | Discuss limitations of the study, taking into account sources of potential bias or imprecision. Discuss both direction and magnitude of any potential bias                 | p.16-17 |
| Interpretation   | 20 | Give a cautious overall interpretation of results considering objectives, limitations, multiplicity of analyses, results from similar studies, and other relevant evidence | p.14-17 |
| Generalisability | 21 | Discuss the generalisability (external validity) of the study results                                                                                                      | p.17    |

**Other information**

|         |    |                                                                                                                                                               |         |
|---------|----|---------------------------------------------------------------------------------------------------------------------------------------------------------------|---------|
| Funding | 22 | Give the source of funding and the role of the funders for the present study and, if applicable, for the original study on which the present article is based | p.8, 18 |
|---------|----|---------------------------------------------------------------------------------------------------------------------------------------------------------------|---------|

\*Give information separately for cases and controls in case-control studies and, if applicable, for exposed and unexposed groups in cohort and cross-sectional studies.

**Note:** An Explanation and Elaboration article discusses each checklist item and gives methodological background and published examples of transparent reporting. The STROBE checklist is best used in conjunction with this article (freely available on the Web sites of PLoS Medicine at <http://www.plosmedicine.org/>, Annals of Internal Medicine at <http://www.annals.org/>, and Epidemiology at <http://www.epidem.com/>). Information on the STROBE Initiative is available at [www.strobe-statement.org](http://www.strobe-statement.org).

# BMJ Open

## Analysis of non-respondent pregnant women who were registered in the Japan Environment and Children's Study: a longitudinal cohort study

|                                 |                                                                                                                                                                                                                                                                                                                                                                                                                                                                                                                                                                                                                                                                                                                                                                                                                                                                                                                                                                                                                                                                                                                                                                                                                                                                                                                                                                                                                                                                                                                                                                                                                                                                                                                                         |
|---------------------------------|-----------------------------------------------------------------------------------------------------------------------------------------------------------------------------------------------------------------------------------------------------------------------------------------------------------------------------------------------------------------------------------------------------------------------------------------------------------------------------------------------------------------------------------------------------------------------------------------------------------------------------------------------------------------------------------------------------------------------------------------------------------------------------------------------------------------------------------------------------------------------------------------------------------------------------------------------------------------------------------------------------------------------------------------------------------------------------------------------------------------------------------------------------------------------------------------------------------------------------------------------------------------------------------------------------------------------------------------------------------------------------------------------------------------------------------------------------------------------------------------------------------------------------------------------------------------------------------------------------------------------------------------------------------------------------------------------------------------------------------------|
| Journal:                        | <i>BMJ Open</i>                                                                                                                                                                                                                                                                                                                                                                                                                                                                                                                                                                                                                                                                                                                                                                                                                                                                                                                                                                                                                                                                                                                                                                                                                                                                                                                                                                                                                                                                                                                                                                                                                                                                                                                         |
| Manuscript ID                   | bmjopen-2018-025562.R2                                                                                                                                                                                                                                                                                                                                                                                                                                                                                                                                                                                                                                                                                                                                                                                                                                                                                                                                                                                                                                                                                                                                                                                                                                                                                                                                                                                                                                                                                                                                                                                                                                                                                                                  |
| Article Type:                   | Research                                                                                                                                                                                                                                                                                                                                                                                                                                                                                                                                                                                                                                                                                                                                                                                                                                                                                                                                                                                                                                                                                                                                                                                                                                                                                                                                                                                                                                                                                                                                                                                                                                                                                                                                |
| Date Submitted by the Author:   | 15-Mar-2019                                                                                                                                                                                                                                                                                                                                                                                                                                                                                                                                                                                                                                                                                                                                                                                                                                                                                                                                                                                                                                                                                                                                                                                                                                                                                                                                                                                                                                                                                                                                                                                                                                                                                                                             |
| Complete List of Authors:       | <p>Kigawa, Mika; Kanagawa University of Human Services, Tsuchida, Akiko; University of Toyama Faculty of Medicine Graduate School of Medicine and Pharmaceutical Science for Education, Department of Public Health; University of Toyama Toyama Regional Center for JECS</p> <p>Miura, Kayoko; Kanazawa University Health Service Center</p> <p>Ito, Mika; University of Toyama Faculty of Medicine Graduate School of Medicine and Pharmaceutical Science for Education, Department of Obstetrics and Gynecology</p> <p>Tanaka, Tomomi; University of Toyama Toyama Regional Center for JECS; University of Toyama Faculty of Medicine Graduate School of Medicine and Pharmaceutical Science for Education, Department of Pediatrics</p> <p>Hamazaki, Kei; University of Toyama Faculty of Medicine Graduate School of Medicine and Pharmaceutical Science for Education, Department of Public Health; University of Toyama Toyama Regional Center for JECS</p> <p>Adachi, Yuichi; University of Toyama Faculty of Medicine Graduate School of Medicine and Pharmaceutical Science for Education, Department of Pediatrics</p> <p>Saito, Shigeru; University of Toyama Faculty of Medicine Graduate School of Medicine and Pharmaceutical Science for Education, Department of Obstetrics and Gynecology</p> <p>Origasa, Hideki; University of Toyama Faculty of Medicine Graduate School of Medicine and Pharmaceutical Science for Education, Department of Biostatistics and Clinical Epidemiology</p> <p>Inadera, Hidekuni; University of Toyama Faculty of Medicine Graduate School of Medicine and Pharmaceutical Science for Education, Department of Public Health; University of Toyama Toyama Regional Center for JECS</p> |
| <b>Primary Subject Heading</b>: | Epidemiology                                                                                                                                                                                                                                                                                                                                                                                                                                                                                                                                                                                                                                                                                                                                                                                                                                                                                                                                                                                                                                                                                                                                                                                                                                                                                                                                                                                                                                                                                                                                                                                                                                                                                                                            |
| Secondary Subject Heading:      | Public health, Paediatrics                                                                                                                                                                                                                                                                                                                                                                                                                                                                                                                                                                                                                                                                                                                                                                                                                                                                                                                                                                                                                                                                                                                                                                                                                                                                                                                                                                                                                                                                                                                                                                                                                                                                                                              |
| Keywords:                       | non-response, longitudinal cohort study, Pregnant women, Birth cohort study                                                                                                                                                                                                                                                                                                                                                                                                                                                                                                                                                                                                                                                                                                                                                                                                                                                                                                                                                                                                                                                                                                                                                                                                                                                                                                                                                                                                                                                                                                                                                                                                                                                             |

1  
2  
3  
4  
5  
6  
7  
8  
9  
10  
11  
12  
13  
14  
15  
16  
17  
18  
19  
20  
21  
22  
23  
24  
25  
26  
27  
28  
29  
30  
31  
32  
33  
34  
35  
36  
37  
38  
39  
40  
41  
42  
43  
44  
45  
46  
47  
48  
49  
50  
51  
52  
53  
54  
55  
56  
57  
58  
59  
60



SCHOLARONE™  
Manuscripts



1  
2  
3  
4  
5  
6 Analysis of non-respondent pregnant women who were registered in the Japan  
7  
8  
9 Environment and Children's Study: a longitudinal cohort study  
10  
11  
12  
13  
14

15 Mika Kigawa<sup>1,2</sup> kigawa-c5s@kuhs.ac.jp  
16  
17  
18 Akiko Tsuchida<sup>2</sup> ecocall4@med.u-toyama.ac.jp  
19  
20  
21 Kayoko Miura<sup>3</sup> miura@staff.kanazawa-u.ac.jp  
22  
23  
24 Mika Ito<sup>4</sup> mito@med.u-toyama.ac.jp  
25  
26  
27 Tomomi Tanaka<sup>2,5</sup> tharai@med.u-toyama.ac.jp  
28  
29  
30 Kei Hamazaki<sup>1,2</sup> keihama@med.u-toyama.ac.jp  
31  
32  
33 Yuichi Adachi<sup>5</sup> yadachi@med.u-toyama.ac.jp  
34  
35  
36 Shigeru Saito<sup>4</sup> s30saito@med.u-toyama.ac.jp  
37  
38  
39 Hideki Origasa<sup>6</sup> horigasa@las.u-toyama.ac.jp  
40  
41  
42 Hidekuni Inadera<sup>1,2</sup> inadera@med.u-toyama.ac.jp  
43  
44  
45  
46  
47

48 <sup>1</sup>Department of Public Health, Faculty of Medicine, Graduate School of Medicine and  
49  
50  
51 Pharmaceutical Sciences, University of Toyama, 2630 Sugitani, Toyama, Toyama  
52  
53  
54 Prefecture 930-0194, Japan  
55

56  
57 <sup>2</sup>Toyama Regional Center for JECS, University of Toyama, 2630 Sugitani, Toyama,  
58  
59  
60

1  
2  
3  
4  
5  
6 Toyama Prefecture 930-0194, Japan  
7  
8

9  
10 <sup>3</sup>Kanazawa University Health Service Center, Kadoma, Kanazawa city, Ishikawa  
11  
12 Prefecture 920-1192, Japan  
13  
14

15  
16 <sup>4</sup>Department of Obstetrics and Gynecology, Faculty of Medicine, Graduate School of  
17  
18 Medicine and Pharmaceutical Sciences, University of Toyama, 2630 Sugitani,  
19  
20 Toyama, Toyama Prefecture 930-0194, Japan  
21  
22

23  
24 <sup>5</sup>Department of Pediatrics, Faculty of Medicine, Graduate School of Medicine and  
25  
26 Pharmaceutical Sciences, University of Toyama, 2630 Sugitani, Toyama, Toyama  
27  
28 Prefecture 930-0194, Japan  
29  
30  
31

32  
33 <sup>6</sup>Department of Biostatistics and Clinical Epidemiology, Graduate School of Medicine  
34  
35 and Pharmaceutical Sciences, University of Toyama, 2630 Sugitani, Toyama, Toyama  
36  
37 Prefecture 930-0194, Japan  
38  
39  
40

41  
42  
43  
44  
45 Corresponding author: Mika Kigawa  
46  
47  
48  
49  
50  
51  
52  
53  
54  
55  
56  
57  
58  
59  
60

## 1 Abstract

2  
3  
4  
5  
6  
7  
8  
9  
10 2 **Objectives:** Non-response to questionnaires in a longitudinal study reduces the effective  
11  
12 3 sample size and introduces bias. We identified the characteristics of non-respondent  
13  
14 4 pregnant women, and compared them with respondents in the Japan Environment and  
15  
16 5 Children's Study (JECS) during the gestational period. **Design:** This was a  
17  
18 6 questionnaire-based, longitudinal cohort study. **Setting:** Questionnaires were provided  
19  
20 7 by research coordinators to mothers at prenatal examinations (at obstetrics clinics) or by  
21  
22 8 mail. Mothers were measured twice: during the first trimester and during the  
23  
24 9 second/third trimester. **Participants:** Data were collected from the 10,129 participating  
25  
26 10 mothers of the 10,288 children surveyed in the 2011 baseline JECS. We excluded  
27  
28 11 responses from mothers who had a miscarriage or still birth; therefore, we analysed data  
29  
30 12 from 9,649 participants. **Primary and secondary outcome measures:** Data concerning  
31  
32 13 demographics, medical history, health characteristics, health-related behaviour, and  
33  
34 14 environmental exposure were collected via self-administered questionnaires. The  
35  
36 15 response status of participants' partners and contact with their obstetrician were also  
37  
38 16 examined. Multivariate logistic regression analysis was used to examine factors related  
39  
40 17 to non-response. **Results:** Response was associated with living with one's mother-in-law  
41  
42 18 (odds ratio [OR]: 0.47, 95% confidence interval [CI]: 0.24–0.85), positive participation of  
43  
44  
45  
46  
47  
48  
49  
50  
51  
52  
53  
54  
55  
56  
57  
58  
59  
60

1 participants' partner (OR: 0.25, 95% CI: 0.17–0.35), and multiple visits to the  
2 obstetrician (OR: 0.02, 95% CI: 0.02–0.03). Participants who had a medical history of  
3 allergic rhinitis, had body pain, or drank alcohol had higher odds of responding (ORs:  
4 0.68, 0.96, and 0.36, 95% CIs: 0.48–0.95, 0.95–0.98, and 0.16–0.72, respectively); those  
5 exposed to secondary smoke had lower odds of responding (OR: 1.59, 95% CI: 1.12–2.23).

6 **Conclusions:** The non-response rate decreased when participants reported health-related  
7 behaviour or characteristics. Obtaining the understanding of people around each  
8 participant might help increase response rates.

#### 9 10 **Strengths and limitations of this study**

11 ▪ The Japan Environment and Children's Study (JECS) is a nationwide birth cohort  
12 study that includes 10,129 mothers with confirmed obstetric outcomes in the first year  
13 of recruitment.

14 ▪ During the gestational period, we provided self-administered questionnaires to mothers  
15 twice.

16 ▪ The study is strengthened by its assessment of the effects of non-response on prevalence  
17 estimates as well as the exposure–outcome relationship.

18 ▪ The sample size of this study was sufficient to examine the risk factors of non-response.

- 1  
2  
3  
4  
5  
6  
7 1   ▪ We were unable to examine the effects of some socioeconomic factors on non-response.  
8  
9  
10 2  
11  
12 3  
13  
14  
15  
16  
17  
18  
19  
20  
21  
22  
23  
24  
25  
26  
27  
28  
29  
30  
31  
32  
33  
34  
35  
36  
37  
38  
39  
40  
41  
42  
43  
44  
45  
46  
47  
48  
49  
50  
51  
52  
53  
54  
55  
56  
57  
58  
59  
60

For peer review only

## 1 **Background**

2 Population-based studies are used to provide epidemiological data on the occurrence  
3 of disease and to identify risk factors that may be relevant to these outcomes. The Japan  
4 Environment and Children's Study (JECS) is a nationwide birth cohort study that  
5 started recruiting expectant mothers in January 2011. [1]

6 In the first year of recruitment, approximately 10,000 registered pregnant women  
7 had confirmed obstetric outcomes. Data on participants' health-related behaviour,  
8 marital status, socioeconomic status, and education level were collected via self-  
9 administered questionnaires provided twice during the gestational period.[2]

10 In recent years, the response rates have decreased in several epidemiological studies  
11 over time. Although a particular study may achieve a high response rate, the prevalence  
12 estimates may still be biased if the non-responses are not random. The non-response  
13 bias may be related to selection bias; thus, the characteristics of non-respondents need  
14 to be confirmed.[3,4] Systematic differences in the characteristics of respondents and  
15 non-respondents detract from the outcomes of interest. Therefore, the presence and  
16 extent of such bias should be investigated.[5] In a cross-sectional health survey, Pietila  
17 and colleagues compared the backgrounds of responding and non-responding young  
18 men and found that their socioeconomic status and education level were related to their

1 response status.[6] Furthermore, the response status in the Atherosclerosis Risk in  
2 Communities Study differed according to sex and ethnicity.[7]

3 Long-term follow-up studies are hampered by a decrease in response rate due to the  
4 lapse of time between birth and follow-up. A systematic review of randomized controlled  
5 trials using postal questionnaires showed that the response rate was related to the  
6 length and/or design of questionnaire, use of personalized letters, and follow-up contact,  
7 and matched the interests of participants and originating sources.[8] In longitudinal  
8 cohort studies, various factors have been shown to be related to response status,  
9 including age, sex, marital status, education, health status, health-related behaviour,  
10 lifestyle, ethnicity, study objectives, contact modes, number and order of contact modes,  
11 and use of incentives.[9-12]

12 Some authors have suggested that non-response increases the proportion of infants  
13 with adverse outcomes in the remaining study population [13]; however, how these  
14 factors influence study outcomes is unclear. Therefore, we performed this study to  
15 describe the characteristics of non-responders. We studied pregnant women who were  
16 registered in a prospective, cohort study and who did not return the second questionnaire  
17 during the gestational period.

## 1 **Methods**

### 2 **Design of the JECS**

3 In the JECS, self-administered questionnaires were provided to mothers twice:  
4 during the first trimester (MT1) and during the second/third trimester (MT2).  
5 Questionnaires were provided by research coordinators at prenatal examinations (in the  
6 obstetrics clinic) or by mail and returned either by hand at subsequent prenatal visits  
7 (in the obstetrics clinic) or by mail. The partners of registered mothers were also asked  
8 to participate. We collected data from registered partners during the women's pregnancy  
9 through self-administered questionnaires returned by hand or by mail. Women's medical  
10 records were transcribed three times, by obstetricians, midwives/nurses, or research  
11 coordinators at the obstetrics clinic: during the first trimester, during the second/third  
12 trimester, and after delivery.

### 13 **Design of the non-responder study**

14 In this study, we defined 'non-respondents' as JECS participants who did not return  
15 the questionnaire of 2<sup>nd</sup>/3<sup>rd</sup> trimesters. This study was based on a data set (i.e. jecs-ag-  
16 ai-20131008), which was released in October 2013 (The dataset supporting the  
17 conclusions of this article will be available after the steering committee of the JECS  
18 permits its accessibility). The participant flow is illustrated in Figure 1.



1 Using the MT1 questionnaire, demographic data (age, marital status, and cohabiting  
2 family members), medical and obstetric history, health-related behaviour  
3 (smoker/exposure to secondary smoke, and alcohol consumption), and occupational data  
4 were collected. The SF-8™ questionnaire (Japanese version) [14] was used to assess  
5 participants' health-related quality of life (QOL). The K6 questionnaire (Japanese  
6 version) was used to assess participants' psychological distress. [15] Age was divided into  
7 four categories: <25 years, 25–29 years, 30–34 years, and ≥35 years. We collected data of  
8 cohabiting family members via multiple-choice questionnaires.

9 The response data from participants' partners and a transcription sheet regarding  
10 health status data during the gestational period were linked with each participant.

### 11 **Definitions**

12 Participants' obstetric visiting status was a binary variable and was defined as  
13 present for a participant when the transcription sheet was returned if they had reported  
14 "multiple obstetric visits to collaborating hospitals during pregnancy." Partners'  
15 participation status was defined as positive when partners returned the questionnaire.

16 We collected information on occupation and types of employment of participants with  
17 the MT1 questionnaire. We focused on the following settings: homemakers or  
18 unemployed, worked from home, and employed. For allocation of these settings, we used

1  
2  
3  
4  
5  
6  
7 1 the Japan Standard Occupational Classification and the classification of positions in  
8  
9 2 employment by the Ministry of Internal Affairs and Communication.  
10

11  
12 3 Regarding exposure to secondary smoke before pregnancy, 'daily' was defined as  
13  
14  
15 4 when participants answered with 'exposed at least once a week'.  
16  
17

### 18 **Patient and Public Involvement**

19  
20  
21 6 JECS started recruiting expectant mothers in January 2011 with the aim of assessing  
22  
23  
24 7 environmental factors that affect children's health, with the goal of providing a  
25  
26  
27 8 foundation for policymaking to safeguard the environment for the next generation. JECS  
28  
29  
30 9 study aimed to recruit approximately 100,000 pregnant women and their partners over  
31  
32  
33 10 3 years, to collect biological samples, and to collect data on their children until they  
34  
35  
36 11 turned 13 years old.[1]  
37  
38

39 12 Written informed consent for participation in JECS was obtained from individual  
40  
41  
42 13 mothers. In addition to the JECS main study, adjunct studies were conducted by the  
43  
44  
45 14 member of JECS group, or any combination of them. The adjunct studies may have  
46  
47  
48 15 included procedures that were not adopted by the main study, e.g., collection and  
49  
50  
51 16 examination of placenta. This study was one of the adjunct studies of JECS, based on an  
52  
53  
54 17 existing dataset, and hence, patients were not directly involved in the sampling process.  
55  
56

### 57 **Ethical considerations**

58  
59  
60

1 The JECS protocol was reviewed and approved by the Ministry of the Environment's  
2 Institutional Review Board on Epidemiological Studies and by the Ethics Committees of  
3 all participating institutions. Written informed consent was obtained from all  
4 participating women and their partners.

### 5 **Statistical analyses**

6 The following variables were considered in the analyses for mothers: demographic  
7 data (age, marital status, and cohabiting family members), medical and obstetric history,  
8 physical and mental health, health-related behaviours, occupation, environmental  
9 exposure, contact status with their obstetrician, and partners' response status. Of these  
10 variables, a Student's t-test or Welch's t-test for independent groups was used for  
11 physical and mental health variables (SF-8, K6), or number of cohabiting family  
12 members (continuous variables), and a Pearson's chi-square test or Fisher's exact test  
13 was used for other variables (categorical variables). The variables that had significant  
14 associations with non-response to the MT2 questionnaire in the bivariate logistic  
15 regression models were included in the multivariate models. Prevalence odds ratios and  
16 95% confidence intervals for non-response were estimated using multivariate logistic  
17 regression analyses. The contribution of a variable to the regression model was assessed  
18 using the likelihood ratio test.

1 A significance level of 0.05 (two-tailed) was used for all statistical tests. JMP® Pro  
2 version 11 (SAS Institute Inc., Cary, NC, USA) was used for all statistical analyses.

### 3 **Results**

4 The overall response rate to the questionnaire in the second/third trimester was  
5 97.7% (9432/9649). Table 1 shows participants' characteristics at the first trimester,  
6 their partners' participating status, and visits to the obstetrician among responders and  
7 non-responders. The proportions of marital status, family members, medical history,  
8 exposure to secondary smoke, and job status significantly differed between responders  
9 and non-responders. The responders were more likely to be married, living with in-laws,  
10 have a history of allergic rhinitis or allergic conjunctivitis, have better physical  
11 functioning, have a high response rate from their partner, and make more visits to the  
12 obstetrician. Additionally, responders were less likely to have a history of migraines or  
13 polycystic ovary syndrome than were non-responders. Non-responders were more likely  
14 to have been exposed to secondary smoke than were responders. Participants who were  
15 employed were more likely to respond than were their counterparts. The SF-8 Physical  
16 Functioning and Body Pain scales were significantly higher for responders than for non-  
17 responders.

1 Two variables showed significant associations—living with one’s mother-in-law and  
2 having allergic rhinitis—with non-response according to the bivariate logistic regression  
3 model. Table 2 shows the odds ratios for non-response according to the various  
4 demographic and clinical characteristics, partners’ participation status, and visiting  
5 obstetricians in the multivariate logistic regression analyses. Model 1 included the  
6 variables that had significant associations with non-response of MT2.

7 The odds of non-response were lower in participants who had a medical history of  
8 allergies, which is one of the priority outcomes of the JECS[1]; had a positive QOL; were  
9 living with their mother-in-law; had partners who actively participated; and had  
10 maintained contact with obstetricians. However, the odds of non-response were higher  
11 in participants who had been exposed to secondary smoke. Marital status, job site, and  
12 the SF-8 physical functioning scale did not match the model, and thus were excluded.

13 Model 2 excluded variables that did not show significance in Model 1. The odds of  
14 non-response were higher in participants who had been exposed to secondary smoke;  
15 however, the odds were lower in participants who lived with their mother-in-law, had a  
16 history of allergic rhinitis, had a positive QOL regarding body pain, had partners who  
17 participated, and visited the obstetrician.

## 1 Discussion

2 Using data collected during pregnancy, we evaluated non-response bias in  
3 approximately 10,000 pregnant women who participated in the JECS. Many factors were  
4 independently associated with response to the follow-up questionnaire. The  
5 characteristics associated with a greater probability of response included being married,  
6 living with one's mother-in-law, and where the participants worked. Having a medical  
7 history of allergic rhinitis or allergic conjunctivitis resulted in a higher probability of  
8 response. The number of partners with positive participation in the JECS and multiple  
9 visits to the obstetrician were significantly lower in non-responders than in responders.

10 The odds ratios for non-response were correlated with demographic and clinical  
11 characteristics, partners' participation status, and visiting the obstetrician in the  
12 multivariate logistic regression analysis. Specifically, the odds of non-response were  
13 lower in participants who had a medical history of allergies, which is one of the priority  
14 outcomes of the JECS; who had a positive QOL; who were living with their mother-in-  
15 law; whose partners participated; and who maintained contact with obstetricians. The  
16 odds of non-response were higher in participants who had been exposed to secondary  
17 smoke. Baron and colleagues reported that passive smoking showed disparity across  
18 educational levels.[16] We could not consider the effects of education; however, the

1 relationship between non-response and exposure to secondary smoke might be affected  
2 by participants' education.

3 One of the objectives of the JECS was to assess environmental factors that affect  
4 children's health (e.g. allergic diseases). The prevalence of allergic rhinitis in the  
5 Japanese population was 44.2% in 2006–2007 [17] and that of allergic conjunctivitis  
6 disease was 14.8% in 1993. [18] Both were higher than those reported in the current  
7 study (35.9% and 10.9%, respectively). Macera and colleagues reported that responders  
8 were individuals who had family members with certain chronic conditions in their  
9 health-related survey. [19] Leadbetter and colleagues examined the perceived risk of  
10 cancer by comparing early and late responders. They reported that the salience of the  
11 survey topic was associated with a prompt response. [20] In this survey, participants  
12 with interest in children's allergic diseases were more likely to respond; however, daily  
13 exposure to secondary smoke made non-responses more likely. In health-related surveys,  
14 participants with risky health behaviours are more likely to be non-respondents than  
15 are those who exhibit healthier behaviour. [21]

16 Etter and colleagues reported that respondents had better general health than did  
17 non-respondents.[22] Martikainen and colleagues evaluated non-response bias in  
18 analyses of social class inequalities in health.[23] They found that female non-

1 respondents had an approximately 20–30% higher sickness absence rate per 100 person-  
2 years than did respondents. Our results from the Body Pain scale showed that  
3 respondents were healthier than were non-respondents, which is consistent with these  
4 previous results. The response rate was higher among participants who lived with their  
5 mother-in-law, those who had partners who positively participated, and those who  
6 maintained contact with an obstetrician. Alessi and colleagues suggested that general  
7 practitioners' understanding of the study could influence the attitude of their patients.  
8 [24] Our results indicate that the same is true for people close to the participants. Hatta  
9 and colleagues reported that parents-in-law were perceived as the least cohesive persons  
10 among close family members in Japan. [25] Another study of postpartum depression in  
11 China reported that the underlying cultural setting of the daughter-in-law/mother-in-  
12 law relationship contributed to depression among daughters-in-law. [26] In our survey,  
13 the presence of a mother-in-law may have acted as a stressor to motivate the participants  
14 to return the questionnaires.

15 Further, we collected participants' job status and categorized it into three modes:  
16 homemakers or unemployed, worked from home, and employed. The response rate  
17 depended on participants' job, with a higher response rate being found among  
18 participants working from home than among those whose job location was outside of



1  
2  
3  
4  
5  
6 1 their home. In the Survey on Time Use and Leisure Activities in 2011,[27] women who  
7  
8  
9 2 worked from home (family workers) spent more time on housework and less time on self-  
10  
11  
12 3 education/training and hobbies/amusement than did those who were employed outside  
13  
14  
15 4 of their home. Associations with response to the questionnaire were also observed for job  
16  
17  
18 5 location and time spent answering the questionnaire; however, these relationships were  
19  
20  
21 6 weak.

22  
23  
24 7 The limitations of this study are as follows: 1) a lack of information on education level  
25  
26  
27 8 and participants' socioeconomic status, 2) a lack of information on the survey mode, and  
28  
29  
30 9 3) a lack of information on partners' registration status. However, we know that  
31  
32  
33 10 socioeconomic status and education level are related to response status. [6,28-30]. In the  
34  
35  
36 11 JECS study, however, the socioeconomic and education status data were collected with  
37  
38  
39 12 the MT2 questionnaire, which was used to examine the non-response factor. Thus, We  
40  
41  
42 13 could not examine these factors. In particular, it seems that the investigators'  
43  
44  
45 14 interpretation of 'secondary smoke' was inconsistent with their results regarding alcohol  
46  
47  
48 15 consumption or health-related variables. These variables were related to socioeconomic  
49  
50  
51 16 and education status. In addition, several researchers have reported that response  
52  
53  
54 17 status differs according to survey mode.[31-34] In this study, we collected questionnaires  
55  
56  
57 18 by hand or by mail. Because we were unable to collect data on the mode used, we did not  
58  
59  
60

1  
2  
3  
4  
5  
6 1 evaluate the effect of these distinct modes. We were also unable to collect information  
7  
8  
9 2 regarding the extent of partners' participation—any response was considered positive.  
10  
11  
12 3 Finally, we could not confirm participants' medical or obstetric history using clinical data.  
13  
14  
15 4 Relying solely on data collected by self-administered questionnaires introduces the risk  
16  
17  
18 5 of response bias.  
19  
20  
21  
22  
23

## 24 **Conclusions**

25  
26  
27 7 In conclusion, this study showed that obtaining understanding of the research  
28  
29  
30 8 objectives from people who are close to the participants was associated with a higher  
31  
32  
33 9 odds of response. To reduce the non-response rate in future follow-up surveys, additional  
34  
35  
36 10 efforts should be made to maintain contact and encourage participation among  
37  
38  
39 11 individuals who display relevant characteristics of potential non-responders. Because  
40  
41  
42 12 the data collected from pregnant women participating in JECS were used in this study,  
43  
44  
45 13 it means the participants may have been influenced by the Japanese culture and/or their  
46  
47  
48 14 socioeconomic situation. It is necessary to consider the results obtained from other  
49  
50  
51 15 participants from different cultures or nationalities.  
52  
53  
54  
55

## 56 **Declarations**

## 57 58 59 17 **Data sharing statement** 60

1  
2  
3  
4  
5  
6  
7  
8  
9  
10  
11  
12  
13  
14  
15  
16  
17  
18  
19  
20  
21  
22  
23  
24  
25  
26  
27  
28  
29  
30  
31  
32  
33  
34  
35  
36  
37  
38  
39  
40  
41  
42  
43  
44  
45  
46  
47  
48  
49  
50  
51  
52  
53  
54  
55  
56  
57  
58  
59  
60

1 The dataset supporting the conclusions of this article will be available after the  
2 steering committee of the JECS allows it to become available.

3 The dataset supporting the conclusions of this article is unsuitable for public  
4 deposition due to ethical restrictions and legal framework of Japan. The Act on the  
5 Protection of Personal Information (Act No. 57 of 30 May 2003; amendment on 9  
6 September 2015) prohibits publicly depositing data containing personal information. The  
7 Ethical Guidelines for Medical and Health Research Involving Human Subjects, which  
8 are enforced by the Japan Ministry of Education, Culture, Sports, Science and  
9 Technology and the Ministry of Health, Labour and Welfare, also restrict the open  
10 sharing of epidemiologic data. All inquiries about access to these data should be sent to  
11 Dr Shoji F. Nakayama, JECS Programme Office, National Institute for Environmental  
12 Studies; email: jecs-en@nies.go.jp.

### 13 **Competing interests**

14 The authors declare that they have no competing interests.

### 15 **Funding**

16 The Japan Environment and Children's Study was supported by the Ministry of the  
17 Environment, Japan. The findings and conclusions of this article are solely the  
18 responsibility of the authors and do not represent the official views of the above-

1 mentioned government.

## 2 **Authors' contributions**

3 MK designed and conducted the study, performed the statistical analyses, and wrote  
4 the manuscript. KM helped draft the manuscript. AT conducted the data collection and  
5 helped draft the manuscript. MI and TT conducted data collection and helped critically  
6 revise the manuscript. KH and HI participated in the study design and helped critically  
7 revise the manuscript. HO assisted with the statistical analyses. YA and SS helped  
8 critically revise the manuscript. All authors have read and approved the final  
9 manuscript.

## 10 **Figure legend**

11 Figure 1. Participant (expecting mothers) flow

## 12 **Acknowledgements**

13 We thank all members of the JECS as of 2015: Toshihiro Kawamoto (principal  
14 investigator), Hirohisa Saito (Medical Support Center for the JECS, National Center for  
15 Child Health and Development, Tokyo, Japan), Reiko Kishi (Hokkaido Regional Center  
16 for the JECS, Hokkaido University, Sapporo, Japan), Nobuo Yaegashi (Miyagi Regional  
17 Center for the JECS, Tohoku University, Sendai, Japan), Koichi Hashimoto (Fukushima  
18 Regional Center for the JECS, Fukushima Medical University, Fukushima, Japan),

- 1 Chisato Mori (Chiba Regional Center for the JECS, Chiba University, Chiba, Japan),
- 2 Fumiki Hirahara (Kanagawa Regional Center for the JECS, Yokohama City University,
- 3 Yokohama, Japan), Zentaro Yamagata (Koshin Regional Center for the JECS,
- 4 University of Yamanashi, Chuo, Japan), Hidekuni Inadera (Toyama Regional Center for
- 5 the JECS, University of Toyama, Toyama, Japan), Michihiro Kamijima (Aichi Regional
- 6 Center for the JECS, Nagoya City University, Nagoya, Japan), Ikuo Konishi (Kyoto
- 7 Regional Center for the JECS, Kyoto University, Kyoto, Japan), Hiroyasu Iso (Osaka
- 8 Regional Center for the JECS, Osaka University, Suita, Japan), Masayuki Shima (Hyogo
- 9 Regional Center for the JECS, Hyogo College of Medicine, Nishinomiya, Japan),
- 10 Toshihide Ogawa (Tottori Regional Center for the JECS, Tottori University, Yonago,
- 11 Japan), Narufumi Suganuma (Kochi Regional Center for the JECS, Kochi University,
- 12 Nankoku, Japan), Koichi Kusuhara (Fukuoka Regional Center for the JECS, University
- 13 of Occupational and Environmental Health, Kitakyushu, Japan), and Takahiko Katoh
- 14 (South Kyushu/Okinawa Regional Center for the JECS, Kumamoto University,
- 15 Kumamoto, Japan).

## References

1. Kawamoto T, Nitta H, Murata K, *et al.* Rationale and study design of the Japan environment and children's study (JECS). *BMC Public Health* 2014;14:25.
2. Michikawa T, Nitta H, Nakayama SF, *et al.* The Japan Environment and Children's Study (JECS): A preliminary report on selected characteristics of approximately 10 000 pregnant women recruited during the first year of the study. *J Epidemiol* 2015;25(6):452–458.
3. Christensen AI, Ekholm O, Gray L, *et al.* What is wrong with non-respondents? Alcohol-, drug- and smoking-related mortality and morbidity in a 12-year follow-up study of respondents and non-respondents in the Danish Health and Morbidity Survey. *Addiction* 2015;110(9):1505–12.
4. Schneider KL, Clark MA, Rakowski W, *et al.* Evaluating the impact of non-response bias in the Behavioral Risk Factor Surveillance System (BRFSS). *J Epidemiol Community Health* 2012;66(4):290–5.
5. Stang A. Nonresponse research—an underdeveloped field in epidemiology. *Eur J Epidemiol* 2003;18(10):929–31.
6. Pietilä AM, Rantakallio P, Laara E. Background factors predicting non-response in a health survey of northern Finnish young men. *Scand J Soc Med* 1995;23(2):129–36.
7. Jackson R, Chambless LE, Yang K, *et al.* Differences between respondents and nonrespondents in a multicenter community-based study vary by gender ethnicity. The Atherosclerosis Risk in Communities (ARIC) Study Investigators. *J Clin Epidemiol* 1996;49(12):1441–6.
8. Edwards P, Roberts I, Clarke M, *et al.* Increasing response rates to postal questionnaires: Systematic review. *BMJ* 2002;324(7347):1183.
9. Young AF, Powers JR, Bell SL. Attrition in longitudinal studies: Who do you lose? *Aust NZ J Public Health* 2006;30(4):353–61.
10. Powers J, Loxton D. The impact of attrition in an 11-year prospective longitudinal study of younger women. *Ann Epidemiol* 2010;20(4):318–21.
11. Launes J, Hokkanen L, Laasonen M, *et al.* Attrition in a 30-year follow-up of a perinatal birth risk cohort: Factors change with age. *PeerJ* 2014;2:e480.
12. Sheikh K, Mattingly S. Investigating non-response bias in mail surveys. *J Epidemiol Community Health* 1981;35(4):293–6.
13. Wolke D, Sohne B, Ohrt B, *et al.* Follow-up of preterm children: Important to document dropouts. *Lancet* 1995;345(8947):447.
14. Fukuhara S, Suzukamo Y. Manual of the SF-8 Japanese version. Kyoto, Japan:

- 1  
2  
3  
4  
5  
6 1 Institute for Health Outcomes & Process Evaluation Research. 2004.
- 7 2 15. Furukawa TA, Kawakami N, Saitoh M, et al. The performance of the Japanese  
8 3 version of the K6 and K10 in the World Mental Health Survey Japan. *Int J Methods*  
9 4 *Psychiatr Res* 2008;17(3):152–8.
- 10 5 16. Baron R, Mannien J, te Velde SJ, et al. Socio-demographic inequalities across a range  
11 6 of health status indicators and health behaviours among pregnant women in prenatal  
12 7 primary care: a cross-sectional study. *BMC Pregnancy Childbirth* 2015;15:261.
- 13 8 17. Sakashita M, Hirota T, Harada M, et al. Prevalence of allergic rhinitis and  
14 9 sensitization to common aeroallergens in a Japanese population. *Int Arch Allergy*  
15 10 *Immunol* 2010;151(3):255–61.
- 16 11 18. Fernandez C. Ethical issues in health research in children. *Paediatr Child Health*  
17 12 2008;13(8):707–12.
- 18 13 19. Macera CA, Jackson KL, Davis DR, et al. Patterns of non-response to a mail survey.  
19 14 *J Clin Epidemiol* 1990;43(12):1427–30.
- 20 15 20. Leadbetter S, Hawkins NA, Scholl LE, et al. Recruiting women for a study on  
21 16 perceived risk of cancer: influence of survey topic salience and early versus late  
22 17 response. *Prev Chronic Dis* 2013;10:E75.
- 23 18 21. Goldberg M, Chastang JF, Zins M, et al. Health problems were the strongest  
24 19 predictors of attrition during follow-up of the GAZEL cohort. *J Clin Epidemiol*  
25 20 2006;59(11):1213–21.
- 26 21 22. Etter JF, Perneger TV. Analysis of non-response bias in a mailed health survey. *J*  
27 22 *Clin Epidemiol* 1997;50(10):1123–8.
- 28 23 23. Martikainen P, Laaksonen M, Piha K, et al. Does survey non-response bias the  
29 24 association between occupational social class and health? *Scand J Public Health*  
30 25 2007;35(2):212–5.
- 31 26 24. Alessi D, Pastore G, Zuccolo L, et al. Analysis of nonresponse in the assessment of  
32 27 health-related quality of life of childhood cancer survivors. *Eur J Cancer Prev*  
33 28 2007;16(6):576–80.
- 34 29 25. Hatta T, Kadobayashi S, Iwamoto T, et al. Interpersonal constructs of pregnant  
35 30 married women during pregnancy and postpartum period as perceptions of family  
36 31 members. *Percept Mot Skills* 2000;91(3 Pt 1):789–99.
- 37 32 26. Gao LL, Chan SW, You L, et al. Experiences of postpartum depression among first-  
38 33 time mothers in mainland China. *J Adv Nurs* 2010;66(2):303–12.
- 39 34 27. Statistics Bureau, Ministry of Internal Affairs. Survey on time use and leisure  
40 35 activities. In., 2013/4/1 edn; 2013.
- 41 36 28. Helasoja V, Prattala R, Dregval L, et al. Late response and item nonresponse in the  
42  
43  
44  
45  
46  
47  
48  
49  
50  
51  
52  
53  
54  
55  
56  
57  
58  
59  
60

1  
2  
3  
4  
5  
6  
7  
8  
9  
10  
11  
12  
13  
14  
15  
16  
17  
18  
19  
20  
21  
22  
23  
24  
25  
26  
27  
28  
29  
30  
31  
32  
33  
34  
35  
36  
37  
38  
39  
40  
41  
42  
43  
44  
45  
46  
47  
48  
49  
50  
51  
52  
53  
54  
55  
56  
57  
58  
59  
60

- 1 Finbalt Health Monitor survey. *Eur J Public Health* 2002;12(2):117–23.
- 2 29. Tolonen H, Laatikainen T, Helakorpi S, et al. Marital status, educational level and  
3 household income explain part of the excess mortality of survey non-respondents. *Eur*  
4 *J Epidemiol* 2010;25(2):69–76.
- 5 30. Secor-Turner M, Sieving R, Widome R, et al. Active parent consent for health surveys  
6 with urban middle school students: Processes and outcomes. *J School Health*  
7 2010;80(2):73–9.
- 8 31. Bongers IMB, Van Oers JAM. Mode effects on self-reported alcohol use and problem  
9 drinking: Mail questionnaires and personal interviewing compared. *J Stud Alcohol*  
10 1998;59(3):280–5.
- 11 32. Tse A, Ching R, Ding YB, et al. A comparison of the effectiveness of mail and facsimile  
12 as survey media on response rate, speed and quality. *J Market Res Soc*  
13 1994;36(4):349–55.
- 14 33. Aquilino WS. Telephone versus face-to-face interviewing for household drug use  
15 surveys. *Int J Addict* 1992;27(1):71–91.
- 16 34. Picavet HSJ. National health surveys by mail or home interview: Effects on response.  
17 *J Epidemiol Community Health* 2001;55(6):408–13.



1 Table 1. Baseline characteristics of sample

|                                                          | Responder<br>(n=9,432) | Non-responder<br>(n= 217) |         |
|----------------------------------------------------------|------------------------|---------------------------|---------|
|                                                          | %                      | %                         | p value |
| Age                                                      |                        |                           | 0.205   |
| < 25                                                     | 9.1                    | 10.4                      |         |
| 25 – 29                                                  | 27.3                   | 24.2                      |         |
| 30 – 34                                                  | 35.8                   | 42.3                      |         |
| >= 35                                                    | 27.8                   | 23.1                      |         |
| Marital status                                           |                        |                           | 0.024   |
| Married                                                  | 95.8                   | 93.9                      |         |
| Unmarried                                                | 3.2                    | 3.3                       |         |
| Divorced/widowed                                         | 1.0                    | 2.8                       |         |
| Family member participants living with                   |                        |                           |         |
| None                                                     | 0.7                    | 0.9                       | 0.661*  |
| Partner                                                  | 93.0                   | 91.7                      | 0.471   |
| Children                                                 | 55.3                   | 54.8                      | 0.892   |
| Father                                                   | 7.6                    | 5.5                       | 0.298*  |
| Mother                                                   | 9.9                    | 8.8                       | 0.646*  |
| Brother / sister                                         | 4.2                    | 5.9                       | 0.218   |
| Father-in-law                                            | 9.4                    | 5.5                       | 0.045*  |
| Mother-in-law                                            | 11.6                   | 5.5                       | 0.005*  |
| Brother / sister-in-law                                  | 3.1                    | 0.9                       | 0.071*  |
| 1 <sup>st</sup> pregnancy                                | 30.5                   | 31.0                      | 0.940*  |
| Medical history                                          |                        |                           |         |
| Have allergic rhinitis                                   | 35.9                   | 26.7                      | 0.005*  |
| Have allergic conjunctivitis                             | 10.9                   | 6.4                       | 0.035*  |
| Smoking habits during early pregnancy                    |                        |                           | 0.072   |
| Never smoked                                             | 56.8                   | 50.0                      |         |
| Ex-smokers who quit before pregnancy                     | 24.2                   | 25.2                      |         |
| Ex-smokers who quit after pregnancy                      | 13.5                   | 15.9                      |         |
| Smoker                                                   | 5.5                    | 8.9                       |         |
| Exposed to secondary smoke before pregnancy <sup>a</sup> |                        |                           | < 0.001 |
| Rarely                                                   | 80.2                   | 71.0                      |         |
| Daily                                                    | 19.8                   | 29.0                      |         |
| Alcohol consumption during early pregnancy               |                        |                           | 0.006*  |

|                                                 |           |           |                    |
|-------------------------------------------------|-----------|-----------|--------------------|
| Never drinker                                   | 35.0      | 40.4      |                    |
| Ex-drinkers                                     | 55.0      | 55.4      |                    |
| Drinkers                                        | 10.0      | 4.2       |                    |
| Job site of participants                        |           |           | 0.011              |
| Housewife / unemployed                          | 42.2      | 52.2      |                    |
| Work from home                                  | 3.4       | 3.9       |                    |
| Employed                                        | 54.4      | 43.9      |                    |
| Relationship with others                        |           |           |                    |
| Visits obstetrician <sup>b</sup>                | 97.8      | 54.3      | < 0.001*           |
| Positive participation of partners <sup>c</sup> | 60.4      | 23.9      | < 0.001*           |
|                                                 | Mean, SE  | Mean, SE  | p value            |
| No. of household member                         | 3.3, 0.01 | 3.1, 0.09 | 0.094 <sup>+</sup> |
| Health Related Quality of Life (SF-8)           |           |           |                    |
| General Health                                  | 46.9, 0.1 | 46.7, 0.5 | 0.772              |
| Physical Functioning                            | 46.6, 0.1 | 45.5, 0.5 | 0.027              |
| Role Physical                                   | 43.7, 0.1 | 43.5, 0.6 | 0.756              |
| Body Pain                                       | 50.0, 0.1 | 48.7, 0.6 | 0.025              |
| Vitality                                        | 47.5, 0.1 | 47.2, 0.5 | 0.452              |
| Social Functioning                              | 44.2, 0.1 | 43.4, 0.6 | 0.203              |
| Mental Health                                   | 47.0, 0.1 | 46.2, 0.5 | 0.062              |
| Role Emotional                                  | 47.2, 0.1 | 46.5, 0.5 | 0.198              |
| Physical Component Summary                      | 45.5, 0.1 | 44.8, 0.5 | 0.203              |
| Mental Component Summary                        | 46.3, 0.1 | 45.6, 0.5 | 0.164              |
| Self-Administered mental health (K6)            | 9.6, 0.0  | 10.1, 0.3 | 0.097 <sup>+</sup> |

\*: Fisher's exact test, +: Welch's t test

a: 'Daily' defined as subjects exposed at least once a week.

b: Participants who collected the transcription sheet defined as multiple visits with obstetrician.

c: Positive participation of partner was those who answered the questionnaire.

1 Table 2. (a) Multivariate Logistic Regression Predicting the likelihood of Survey Non-  
 2 response: model 1

| Variable                                                           | OR (95% CI)       | p value |
|--------------------------------------------------------------------|-------------------|---------|
| Marital status                                                     |                   |         |
| Married                                                            | Reference         |         |
| Unmarried                                                          | 0.64 (0.23, 1.48) | 0.324   |
| Divorced/widowed                                                   | 1.22 (0.28, 3.52) | 0.750   |
| Living with mother-in-law (yes / no)                               | 0.50 (0.25, 0.90) | 0.020   |
| Job site of participants                                           |                   |         |
| Housewife or unemployed                                            | Reference         |         |
| Work from home                                                     | 1.58 (0.67, 3.26) | 0.173   |
| Employed                                                           | 0.86 (0.62, 1.19) | 0.107   |
| Medical history of allergic rhinitis (yes / no)                    | 0.62 (0.43, 0.88) | 0.007   |
| Health Related Quality of Life (Physical Functioning)              | 0.98 (0.96, 1.00) | 0.135   |
| Health Related Quality of Life (Body Pain)                         | 0.97 (0.95, 0.98) | 0.002   |
| Exposed to secondary smoke during early pregnancy (daily / rarely) | 1.48 (1.03, 2.11) | 0.034   |
| Alcohol consumption                                                |                   |         |
| Drinker during early pregnancy / never drunk                       | 0.34 (0.14, 0.71) | 0.002   |
| Drinker during early pregnancy / ex-drinkers                       | 0.45 (0.19, 0.92) | 0.027   |
| Relationship with others                                           |                   |         |
| Visits to obstetrician (yes / no)                                  | 0.02 (0.02, 0.04) | <0.001  |
| Positive participation of partners (yes / no)                      | 0.26 (0.18, 0.36) | <0.001  |

3 For this model, data of 9,298 people were used.

4 AICc: 1427.9, LOF: p=1.000

5

1  
2  
3  
4  
5  
6 1 Table 2. (b) Multivariate Logistic Regression Predicting the likelihood of Survey Non-  
7 2 response: model 2

| Variable                                                    | OR (95% CI)       | p value |
|-------------------------------------------------------------|-------------------|---------|
| Living with mother-in-law (yes / no)                        | 0.47 (0.24, 0.85) | 0.011   |
| Having history of allergic rhinitis (yes / no)              | 0.68 (0.48, 0.95) | 0.024   |
| Health Related Quality of Life (Body Pain)                  | 0.96 (0.95, 0.98) | <0.001  |
| Exposed to secondary smoke (daily / rarely)                 | 1.59 (1.12, 2.23) | 0.009   |
| Alcohol consumption (drinker / never drinker)               | 0.36 (0.16, 0.72) | 0.002   |
| Alcohol consumption (drinker / ex-drinker)                  | 0.47 (0.21, 0.92) | 0.026   |
| Visits obstetrician (yes / no)                              | 0.02 (0.02, 0.03) | <0.001  |
| Positive participation of participants' partners (yes / no) | 0.25 (0.17, 0.35) | <0.001  |

22 3 For this analysis, data of 9,634 people were used.

23  
24 4 AICc: 1507.8, LOF: p=1.000

25 5

26 6

27 7

28

29

30

31

32

33

34

35

36

37

38

39

40

41

42

43

44

45

46

47

48

49

50

51

52

53

54

55

56

57

58

59

60



Figure 1. Inclusion of subjects (expecting mothers)

## STROBE Statement—checklist of items that should be included in reports of observational studies

|                              | Item No | Recommendation                                                                                                                                                                                                                                                                                                                                                                                                                                                                                                                                                                                                                                                                                   | The page No   |
|------------------------------|---------|--------------------------------------------------------------------------------------------------------------------------------------------------------------------------------------------------------------------------------------------------------------------------------------------------------------------------------------------------------------------------------------------------------------------------------------------------------------------------------------------------------------------------------------------------------------------------------------------------------------------------------------------------------------------------------------------------|---------------|
| <b>Title and abstract</b>    | 1       | (a) Indicate the study's design with a commonly used term in the title or the abstract                                                                                                                                                                                                                                                                                                                                                                                                                                                                                                                                                                                                           | p. 1          |
|                              |         | (b) Provide in the abstract an informative and balanced summary of what was done and what was found                                                                                                                                                                                                                                                                                                                                                                                                                                                                                                                                                                                              | p. 3          |
| <b>Introduction</b>          |         |                                                                                                                                                                                                                                                                                                                                                                                                                                                                                                                                                                                                                                                                                                  |               |
| Background/rationale         | 2       | Explain the scientific background and rationale for the investigation being reported                                                                                                                                                                                                                                                                                                                                                                                                                                                                                                                                                                                                             | p.6-8         |
| Objectives                   | 3       | State specific objectives, including any prespecified hypotheses                                                                                                                                                                                                                                                                                                                                                                                                                                                                                                                                                                                                                                 | p.8<br>1.1-4  |
| <b>Methods</b>               |         |                                                                                                                                                                                                                                                                                                                                                                                                                                                                                                                                                                                                                                                                                                  |               |
| Study design                 | 4       | Present key elements of study design early in the paper                                                                                                                                                                                                                                                                                                                                                                                                                                                                                                                                                                                                                                          | p.9           |
| Setting                      | 5       | Describe the setting, locations, and relevant dates, including periods of recruitment, exposure, follow-up, and data collection                                                                                                                                                                                                                                                                                                                                                                                                                                                                                                                                                                  | p.9-<br>10    |
| Participants                 | 6       | (a) <i>Cohort study</i> —Give the eligibility criteria, and the sources and methods of selection of participants. Describe methods of follow-up<br><i>Case-control study</i> —Give the eligibility criteria, and the sources and methods of case ascertainment and control selection. Give the rationale for the choice of cases and controls<br><i>Cross-sectional study</i> —Give the eligibility criteria, and the sources and methods of selection of participants<br>(b) <i>Cohort study</i> —For matched studies, give matching criteria and number of exposed and unexposed<br><i>Case-control study</i> —For matched studies, give matching criteria and the number of controls per case | p.9<br>Fig.1  |
| Variables                    | 7       | Clearly define all outcomes, exposures, predictors, potential confounders, and effect modifiers. Give diagnostic criteria, if applicable                                                                                                                                                                                                                                                                                                                                                                                                                                                                                                                                                         | p.9-<br>10    |
| Data sources/<br>measurement | 8*      | For each variable of interest, give sources of data and details of methods of assessment (measurement). Describe comparability of assessment methods if there is more than one group                                                                                                                                                                                                                                                                                                                                                                                                                                                                                                             | p.9-<br>10    |
| Bias                         | 9       | Describe any efforts to address potential sources of bias                                                                                                                                                                                                                                                                                                                                                                                                                                                                                                                                                                                                                                        | p.16-<br>17   |
| Study size                   | 10      | Explain how the study size was arrived at                                                                                                                                                                                                                                                                                                                                                                                                                                                                                                                                                                                                                                                        | Fig.1<br>p.11 |
| Quantitative variables       | 11      | Explain how quantitative variables were handled in the analyses. If applicable, describe which groupings were chosen and why                                                                                                                                                                                                                                                                                                                                                                                                                                                                                                                                                                     | p.9-<br>10    |
| Statistical methods          | 12      | (a) Describe all statistical methods, including those used to control for confounding<br>(b) Describe any methods used to examine subgroups and interactions<br>(c) Explain how missing data were addressed<br>(d) <i>Cohort study</i> —If applicable, explain how loss to follow-up was addressed<br><i>Case-control study</i> —If applicable, explain how matching of cases and                                                                                                                                                                                                                                                                                                                | P10-<br>11    |

1  
2 controls was addressed

3 *Cross-sectional study*—If applicable, describe analytical methods taking  
4 account of sampling strategy

---

5 (e) Describe any sensitivity analyses

6  
7 Continued on next page

8  
9  
10  
11  
12  
13  
14  
15  
16  
17  
18  
19  
20  
21  
22  
23  
24  
25  
26  
27  
28  
29  
30  
31  
32  
33  
34  
35  
36  
37  
38  
39  
40  
41  
42  
43  
44  
45  
46  
47  
48  
49  
50  
51  
52  
53  
54  
55  
56  
57  
58  
59  
60

For peer review only

1  
2  
3  
4  
5  
6  
7  
8  
9  
10  
11  
12  
13  
14  
15  
16  
17  
18  
19  
20  
21  
22  
23  
24  
25  
26  
27  
28  
29  
30  
31  
32  
33  
34  
35  
36  
37  
38  
39  
40  
41  
42  
43  
44  
45  
46  
47  
48  
49  
50  
51  
52  
53  
54  
55  
56  
57  
58  
59  
60**Results**

|                  |     |                                                                                                                                                                                                                                                                                                                                                                                                               |                  |
|------------------|-----|---------------------------------------------------------------------------------------------------------------------------------------------------------------------------------------------------------------------------------------------------------------------------------------------------------------------------------------------------------------------------------------------------------------|------------------|
| Participants     | 13* | (a) Report numbers of individuals at each stage of study—eg numbers potentially eligible, examined for eligibility, confirmed eligible, included in the study, completing follow-up, and analysed<br>(b) Give reasons for non-participation at each stage<br>(c) Consider use of a flow diagram                                                                                                               | p.11             |
| Descriptive data | 14* | (a) Give characteristics of study participants (eg demographic, clinical, social) and information on exposures and potential confounders<br>(b) Indicate number of participants with missing data for each variable of interest<br>(c) <i>Cohort study</i> —Summarise follow-up time (eg, average and total amount)                                                                                           | p.11<br>Tab.1    |
| Outcome data     | 15* | <i>Cohort study</i> —Report numbers of outcome events or summary measures over time<br><i>Case-control study</i> —Report numbers in each exposure category, or summary measures of exposure<br><i>Cross-sectional study</i> —Report numbers of outcome events or summary measures                                                                                                                             | p.11-12<br>Tab.2 |
| Main results     | 16  | (a) Give unadjusted estimates and, if applicable, confounder-adjusted estimates and their precision (eg, 95% confidence interval). Make clear which confounders were adjusted for and why they were included<br>(b) Report category boundaries when continuous variables were categorized<br>(c) If relevant, consider translating estimates of relative risk into absolute risk for a meaningful time period | p.12-13<br>Tab.2 |
| Other analyses   | 17  | Report other analyses done—eg analyses of subgroups and interactions, and sensitivity analyses                                                                                                                                                                                                                                                                                                                |                  |

**Discussion**

|                  |    |                                                                                                                                                                            |         |
|------------------|----|----------------------------------------------------------------------------------------------------------------------------------------------------------------------------|---------|
| Key results      | 18 | Summarise key results with reference to study objectives                                                                                                                   | p.13    |
| Limitations      | 19 | Discuss limitations of the study, taking into account sources of potential bias or imprecision. Discuss both direction and magnitude of any potential bias                 | p.16-17 |
| Interpretation   | 20 | Give a cautious overall interpretation of results considering objectives, limitations, multiplicity of analyses, results from similar studies, and other relevant evidence | p.14-17 |
| Generalisability | 21 | Discuss the generalisability (external validity) of the study results                                                                                                      | p.17    |

**Other information**

|         |    |                                                                                                                                                               |         |
|---------|----|---------------------------------------------------------------------------------------------------------------------------------------------------------------|---------|
| Funding | 22 | Give the source of funding and the role of the funders for the present study and, if applicable, for the original study on which the present article is based | p.8, 18 |
|---------|----|---------------------------------------------------------------------------------------------------------------------------------------------------------------|---------|

\*Give information separately for cases and controls in case-control studies and, if applicable, for exposed and unexposed groups in cohort and cross-sectional studies.

**Note:** An Explanation and Elaboration article discusses each checklist item and gives methodological background and published examples of transparent reporting. The STROBE checklist is best used in conjunction with this article (freely available on the Web sites of PLoS Medicine at <http://www.plosmedicine.org/>, Annals of Internal Medicine at <http://www.annals.org/>, and Epidemiology at <http://www.epidem.com/>). Information on the STROBE Initiative is available at [www.strobe-statement.org](http://www.strobe-statement.org).



# BMJ Open

## Analysis of non-respondent pregnant women who were registered in the Japan Environment and Children's Study: a longitudinal cohort study

|                                 |                                                                                                                                                                                                                                                                                                                                                                                                                                                                                                                                                                                                                                                                                                                                                                                                                                                                                                                                                                                                                                                                                                                                                                                                                                                                                                                                                                                                                                                                                                                                                                                                                                                                                                                                         |
|---------------------------------|-----------------------------------------------------------------------------------------------------------------------------------------------------------------------------------------------------------------------------------------------------------------------------------------------------------------------------------------------------------------------------------------------------------------------------------------------------------------------------------------------------------------------------------------------------------------------------------------------------------------------------------------------------------------------------------------------------------------------------------------------------------------------------------------------------------------------------------------------------------------------------------------------------------------------------------------------------------------------------------------------------------------------------------------------------------------------------------------------------------------------------------------------------------------------------------------------------------------------------------------------------------------------------------------------------------------------------------------------------------------------------------------------------------------------------------------------------------------------------------------------------------------------------------------------------------------------------------------------------------------------------------------------------------------------------------------------------------------------------------------|
| Journal:                        | <i>BMJ Open</i>                                                                                                                                                                                                                                                                                                                                                                                                                                                                                                                                                                                                                                                                                                                                                                                                                                                                                                                                                                                                                                                                                                                                                                                                                                                                                                                                                                                                                                                                                                                                                                                                                                                                                                                         |
| Manuscript ID                   | bmjopen-2018-025562.R3                                                                                                                                                                                                                                                                                                                                                                                                                                                                                                                                                                                                                                                                                                                                                                                                                                                                                                                                                                                                                                                                                                                                                                                                                                                                                                                                                                                                                                                                                                                                                                                                                                                                                                                  |
| Article Type:                   | Research                                                                                                                                                                                                                                                                                                                                                                                                                                                                                                                                                                                                                                                                                                                                                                                                                                                                                                                                                                                                                                                                                                                                                                                                                                                                                                                                                                                                                                                                                                                                                                                                                                                                                                                                |
| Date Submitted by the Author:   | 22-May-2019                                                                                                                                                                                                                                                                                                                                                                                                                                                                                                                                                                                                                                                                                                                                                                                                                                                                                                                                                                                                                                                                                                                                                                                                                                                                                                                                                                                                                                                                                                                                                                                                                                                                                                                             |
| Complete List of Authors:       | <p>Kigawa, Mika; Kanagawa University of Human Services, Tsuchida, Akiko; University of Toyama Faculty of Medicine Graduate School of Medicine and Pharmaceutical Science for Education, Department of Public Health; University of Toyama Toyama Regional Center for JECS</p> <p>Miura, Kayoko; Kanazawa University Health Service Center</p> <p>Ito, Mika; University of Toyama Faculty of Medicine Graduate School of Medicine and Pharmaceutical Science for Education, Department of Obstetrics and Gynecology</p> <p>Tanaka, Tomomi; University of Toyama Toyama Regional Center for JECS; University of Toyama Faculty of Medicine Graduate School of Medicine and Pharmaceutical Science for Education, Department of Pediatrics</p> <p>Hamazaki, Kei; University of Toyama Faculty of Medicine Graduate School of Medicine and Pharmaceutical Science for Education, Department of Public Health; University of Toyama Toyama Regional Center for JECS</p> <p>Adachi, Yuichi; University of Toyama Faculty of Medicine Graduate School of Medicine and Pharmaceutical Science for Education, Department of Pediatrics</p> <p>Saito, Shigeru; University of Toyama Faculty of Medicine Graduate School of Medicine and Pharmaceutical Science for Education, Department of Obstetrics and Gynecology</p> <p>Origasa, Hideki; University of Toyama Faculty of Medicine Graduate School of Medicine and Pharmaceutical Science for Education, Department of Biostatistics and Clinical Epidemiology</p> <p>Inadera, Hidekuni; University of Toyama Faculty of Medicine Graduate School of Medicine and Pharmaceutical Science for Education, Department of Public Health; University of Toyama Toyama Regional Center for JECS</p> |
| <b>Primary Subject Heading</b>: | Epidemiology                                                                                                                                                                                                                                                                                                                                                                                                                                                                                                                                                                                                                                                                                                                                                                                                                                                                                                                                                                                                                                                                                                                                                                                                                                                                                                                                                                                                                                                                                                                                                                                                                                                                                                                            |
| Secondary Subject Heading:      | Public health, Paediatrics                                                                                                                                                                                                                                                                                                                                                                                                                                                                                                                                                                                                                                                                                                                                                                                                                                                                                                                                                                                                                                                                                                                                                                                                                                                                                                                                                                                                                                                                                                                                                                                                                                                                                                              |
| Keywords:                       | non-response, longitudinal cohort study, Pregnant women, Birth cohort study                                                                                                                                                                                                                                                                                                                                                                                                                                                                                                                                                                                                                                                                                                                                                                                                                                                                                                                                                                                                                                                                                                                                                                                                                                                                                                                                                                                                                                                                                                                                                                                                                                                             |

1  
2  
3  
4  
5  
6  
7  
8  
9  
10  
11  
12  
13  
14  
15  
16  
17  
18  
19  
20  
21  
22  
23  
24  
25  
26  
27  
28  
29  
30  
31  
32  
33  
34  
35  
36  
37  
38  
39  
40  
41  
42  
43  
44  
45  
46  
47  
48  
49  
50  
51  
52  
53  
54  
55  
56  
57  
58  
59  
60



SCHOLARONE™  
Manuscripts

1  
2  
3  
4  
5  
6 Analysis of non-respondent pregnant women who were registered in the Japan  
7  
8

9 Environment and Children's Study: a longitudinal cohort study  
10  
11  
12  
13  
14

15 Mika Kigawa<sup>1,2</sup> kigawa-c5s@kuhs.ac.jp  
16

17  
18 Akiko Tsuchida<sup>2</sup> ecocall4@med.u-toyama.ac.jp  
19

20  
21 Kayoko Miura<sup>3</sup> miura@staff.kanazawa-u.ac.jp  
22

23  
24 Mika Ito<sup>4</sup> mito@med.u-toyama.ac.jp  
25

26  
27 Tomomi Tanaka<sup>2,5</sup> tharai@med.u-toyama.ac.jp  
28

29  
30 Kei Hamazaki<sup>1,2</sup> keihama@med.u-toyama.ac.jp  
31

32  
33 Yuichi Adachi<sup>5</sup> yadachi@med.u-toyama.ac.jp  
34

35  
36 Shigeru Saito<sup>4</sup> s30saito@med.u-toyama.ac.jp  
37

38  
39 Hideki Origasa<sup>6</sup> horigasa@las.u-toyama.ac.jp  
40

41  
42 Hidekuni Inadera<sup>1,2</sup> inadera@med.u-toyama.ac.jp  
43  
44  
45  
46  
47

48 <sup>1</sup>Department of Public Health, Faculty of Medicine, Graduate School of Medicine and  
49  
50  
51 Pharmaceutical Sciences, University of Toyama, 2630 Sugitani, Toyama, Toyama  
52  
53  
54 Prefecture 930-0194, Japan  
55

56  
57 <sup>2</sup>Toyama Regional Center for JECS, University of Toyama, 2630 Sugitani, Toyama,  
58  
59  
60

1  
2  
3  
4  
5  
6 Toyama Prefecture 930-0194, Japan  
7  
8

9 <sup>3</sup>Kanazawa University Health Service Center, Kadoma, Kanazawa city, Ishikawa  
10  
11  
12 Prefecture 920-1192, Japan  
13  
14

15 <sup>4</sup>Department of Obstetrics and Gynecology, Faculty of Medicine, Graduate School of  
16  
17  
18 Medicine and Pharmaceutical Sciences, University of Toyama, 2630 Sugitani,  
19  
20  
21 Toyama, Toyama Prefecture 930-0194, Japan  
22  
23

24 <sup>5</sup>Department of Pediatrics, Faculty of Medicine, Graduate School of Medicine and  
25  
26  
27 Pharmaceutical Sciences, University of Toyama, 2630 Sugitani, Toyama, Toyama  
28  
29  
30 Prefecture 930-0194, Japan  
31  
32

33 <sup>6</sup>Department of Biostatistics and Clinical Epidemiology, Graduate School of Medicine  
34  
35  
36 and Pharmaceutical Sciences, University of Toyama, 2630 Sugitani, Toyama,  
37  
38  
39 Toyama Prefecture 930-0194, Japan  
40  
41  
42  
43  
44

45 Corresponding author: Mika Kigawa  
46  
47  
48  
49  
50  
51  
52  
53  
54  
55  
56  
57  
58  
59  
60

## 1 Abstract

2  
3  
4  
5  
6  
7  
8  
9  
10 **Objectives:** Non-response to questionnaires in a longitudinal study reduces the effective  
11  
12  
13 sample size and introduces bias. We identified the characteristics of non-respondent  
14  
15  
16 pregnant women, and compared them with respondents in the Japan Environment and  
17  
18 Children's Study (JECS) during the gestational period. **Design:** This was a  
19  
20  
21 questionnaire-based, longitudinal cohort study. **Setting:** Questionnaires were provided  
22  
23  
24 by research coordinators to mothers at prenatal examinations (at obstetrics clinics) or  
25  
26  
27 by mail. Mothers were measured twice: during the first trimester and during the  
28  
29  
30 second/third trimester. **Participants:** Data were collected from the 10,129 participating  
31  
32  
33 mothers of the 10,288 children surveyed in the 2011 baseline JECS. We excluded  
34  
35  
36 responses from mothers who had a miscarriage or still birth; therefore, we analysed  
37  
38  
39 data from 9,649 participants. **Primary and secondary outcome measures:** Data  
40  
41  
42 concerning demographics, medical history, health characteristics, health-related  
43  
44  
45 behaviour, and environmental exposure were collected via self-administered  
46  
47  
48 questionnaires. The response status of participants' partners and contact with their  
49  
50  
51 obstetrician were also examined. Multivariate logistic regression analysis was used to  
52  
53  
54 examine factors related to non-response. **Results:** Response was associated with living  
55  
56  
57 with one's mother-in-law (odds ratio [OR]: 0.47, 95% confidence interval [CI]: 0.24–0.85),  
58  
59  
60

1 positive participation of participants' partner (OR: 0.25, 95% CI: 0.17–0.35), and  
2 multiple visits to the obstetrician (OR: 0.02, 95% CI: 0.02–0.03). Participants who had a  
3 medical history of allergic rhinitis, had body pain, or drank alcohol had higher odds of  
4 responding (ORs: 0.68, 0.96, and 0.36, 95% CIs: 0.48–0.95, 0.95–0.98, and 0.16–0.72,  
5 respectively); those exposed to secondary smoke had lower odds of responding (OR: 1.59,  
6 95% CI: 1.12–2.23). **Conclusions:** The non-response rate decreased when participants  
7 reported health-related behaviour or characteristics. Obtaining the understanding of  
8 people around each participant might help increase response rates.

#### 9 10 **Strengths and limitations of this study**

- 11 ▪ The Japan Environment and Children's Study (JECS) is a nationwide birth cohort  
12 study that includes 10,129 mothers with confirmed obstetric outcomes in the first year  
13 of recruitment.
- 14 ▪ During the gestational period, we provided self-administered questionnaires to  
15 mothers twice.
- 16 ▪ The study is strengthened by its assessment of the effects of non-response on  
17 prevalence estimates as well as the exposure–outcome relationship.
- 18 ▪ The sample size of this study was sufficient to examine the risk factors of

1  
2  
3  
4  
5  
6 1 non-response.  
7  
8

9 2 ▪ We were unable to examine the effects of some socioeconomic factors on non-response.  
10  
11

12 3  
13  
14

15 4  
16  
17  
18  
19  
20  
21  
22  
23  
24  
25  
26  
27  
28  
29  
30  
31  
32  
33  
34  
35  
36  
37  
38  
39  
40  
41  
42  
43  
44  
45  
46  
47  
48  
49  
50  
51  
52  
53  
54  
55  
56  
57  
58  
59  
60

For peer review only

## 1 Background

2 Population-based studies are used to provide epidemiological data on the occurrence  
3 of disease and to identify risk factors that may be relevant to these outcomes. The  
4 Japan Environment and Children's Study (JECS) is a nationwide birth cohort study  
5 that started recruiting expectant mothers in January 2011. [1]

6 In the first year of recruitment, approximately 10,000 registered pregnant women  
7 had confirmed obstetric outcomes. Data on participants' health-related behaviour,  
8 marital status, socioeconomic status, and education level were collected via  
9 self-administered questionnaires provided twice during the gestational period.[2]

10 In recent years, the response rates have decreased in several epidemiological studies  
11 over time. Although a particular study may achieve a high response rate, the  
12 prevalence estimates may still be biased if the non-responses are not random. The  
13 non-response bias may be related to selection bias; thus, the characteristics of  
14 non-respondents need to be confirmed.[3,4] Systematic differences in the  
15 characteristics of respondents and non-respondents detract from the outcomes of  
16 interest. Therefore, the presence and extent of such bias should be investigated.[5] In a  
17 cross-sectional health survey, Pietila and colleagues compared the backgrounds of  
18 responding and non-responding young men and found that their socioeconomic status



1  
2  
3  
4  
5  
6 1 and education level were related to their response status.[6] Furthermore, the  
7  
8  
9 2 response status in the Atherosclerosis Risk in Communities Study differed according  
10  
11  
12 3 to sex and ethnicity.[7]  
13  
14

15 4 Long-term follow-up studies are hampered by a decrease in response rate due to the  
16  
17  
18 5 lapse of time between birth and follow-up. A systematic review of randomized controlled  
19  
20  
21 6 trials using postal questionnaires showed that the response rate was related to the  
22  
23  
24 7 length and/or design of questionnaire, use of personalized letters, and follow-up contact,  
25  
26  
27 8 and matched the interests of participants and originating sources.[8] In longitudinal  
28  
29  
30 9 cohort studies, various factors have been shown to be related to response status,  
31  
32  
33 10 including age, sex, marital status, education, health status, health-related behaviour,  
34  
35  
36 11 lifestyle, ethnicity, study objectives, contact modes, number and order of contact modes,  
37  
38  
39 12 and use of incentives.[9-12]  
40  
41

42 13 Some authors have suggested that non-response increases the proportion of infants  
43  
44  
45 14 with adverse outcomes in the remaining study population [13]; however, how these  
46  
47  
48 15 factors influence study outcomes is unclear. Therefore, we performed this study to  
49  
50  
51 16 describe the characteristics of non-responders. We studied pregnant women who were  
52  
53  
54 17 registered in a prospective, cohort study and who did not return the second  
55  
56  
57 18 questionnaire during the gestational period.  
58  
59  
60

1  
2  
3  
4  
5  
6  
7  
8  
9  
10  
11  
12  
13  
14  
15  
16  
17  
18  
19  
20  
21  
22  
23  
24  
25  
26  
27  
28  
29  
30  
31  
32  
33  
34  
35  
36  
37  
38  
39  
40  
41  
42  
43  
44  
45  
46  
47  
48  
49  
50  
51  
52  
53  
54  
55  
56  
57  
58  
59  
60

## 1 **Methods**

### 2 **Design of the JECS**

3 In the JECS, self-administered questionnaires were provided to mothers twice:  
4 during the first trimester (MT1) and during the second/third trimester (MT2).  
5 Questionnaires were provided by research coordinators at prenatal examinations (in the  
6 obstetrics clinic) or by mail and returned either by hand at subsequent prenatal visits  
7 (in the obstetrics clinic) or by mail. The partners of registered mothers were also asked  
8 to participate. We collected data from registered partners during the women's  
9 pregnancy through self-administered questionnaires returned by hand or by mail.  
10 Women's medical records were transcribed three times, by obstetricians,  
11 midwives/nurses, or research coordinators at the obstetrics clinic: during the first  
12 trimester, during the second/third trimester, and after delivery.

### 13 **Design of the non-responder study**

14 In this study, we defined 'non-respondents' as JECS participants who did not return  
15 the questionnaire of 2<sup>nd</sup>/3<sup>rd</sup> trimesters. This study was based on a data set (i.e.  
16 jecs-ag-ai-20131008), which was released in October 2013 (The dataset supporting the  
17 conclusions of this article will be available after the steering committee of the JECS

1 permits its accessibility). The participant flow is illustrated in Figure 1.

2 Using the MT1 questionnaire, demographic data (age, marital status, and cohabiting  
3 family members), medical and obstetric history, health-related behaviour  
4 (smoker/exposure to secondary smoke, and alcohol consumption), and occupational data  
5 were collected. The SF-8™ questionnaire (Japanese version) [14] was used to assess  
6 participants' health-related quality of life (QOL). The K6 questionnaire (Japanese  
7 version) was used to assess participants' psychological distress. [15] Age was divided  
8 into four categories: <25 years, 25–29 years, 30–34 years, and ≥35 years. We collected  
9 data of cohabiting family members via multiple-choice questionnaires.

10 The response data from participants' partners and a transcription sheet regarding  
11 health status data during the gestational period were linked with each participant.

## 12 **Definitions**

13 Participants' obstetric visiting status was a binary variable and was defined as  
14 present for a participant when the transcription sheet was returned if they had reported  
15 "multiple obstetric visits to collaborating hospitals during pregnancy." Partners'  
16 participation status was defined as positive when partners returned the questionnaire.

17 We collected information on occupation and types of employment of participants  
18 with the MT1 questionnaire. We focused on the following settings: homemakers or

1  
2  
3  
4  
5  
6 1 unemployed, worked from home, and employed. For allocation of these settings, we used  
7  
8  
9 2 the Japan Standard Occupational Classification and the classification of positions in  
10  
11  
12 3 employment by the Ministry of Internal Affairs and Communication.  
13  
14

15 4 Regarding exposure to secondary smoke before pregnancy, 'daily' was defined as  
16  
17  
18 5 when participants answered with 'exposed at least once a week'.  
19  
20

## 21 6 **Patient and Public Involvement**

22  
23  
24 7 JECS started recruiting expectant mothers in January 2011 with the aim of assessing  
25  
26  
27 8 environmental factors that affect children's health, with the goal of providing a  
28  
29  
30 9 foundation for policymaking to safeguard the environment for the next generation.  
31  
32  
33 10 JECS study aimed to recruit approximately 100,000 pregnant women and their  
34  
35  
36 11 partners over 3 years, to collect biological samples, and to collect data on their children  
37  
38  
39 12 until they turned 13 years old.[1]  
40  
41

42 13 Written informed consent for participation in JECS was obtained from individual  
43  
44  
45 14 mothers. In addition to the JECS main study, adjunct studies were conducted by the  
46  
47  
48 15 member of JECS group, or any combination of them. The adjunct studies may have  
49  
50  
51 16 included procedures that were not adopted by the main study, e.g., collection and  
52  
53  
54 17 examination of placenta. This study was one of the adjunct studies of JECS, based on an  
55  
56  
57 18 existing dataset, and hence, patients were not directly involved in the sampling process.  
58  
59  
60

## 1 **Ethical considerations**

2       The JECS protocol was reviewed and approved by the Ministry of the Environment's  
3 Institutional Review Board on Epidemiological Studies and by the Ethics Committees of  
4 all participating institutions. Written informed consent was obtained from all  
5 participating women and their partners.

## 6 **Statistical analyses**

7       The following variables were considered in the analyses for mothers: demographic  
8 data (age, marital status, and cohabiting family members), medical and obstetric  
9 history, physical and mental health, health-related behaviours, occupation,  
10 environmental exposure, contact status with their obstetrician, and partners' response  
11 status. Of these variables, a Student's t-test or Welch's t-test for independent groups  
12 was used for physical and mental health variables (SF-8, K6), or number of cohabiting  
13 family members (continuous variables), and a Pearson's chi-square test or Fisher's exact  
14 test was used for other variables (categorical variables). The variables that had  
15 significant associations with non-response to the MT2 questionnaire in the bivariate  
16 logistic regression models were included in the multivariate models. Prevalence odds  
17 ratios and 95% confidence intervals for non-response were estimated using multivariate  
18 logistic regression analyses. The contribution of a variable to the regression model was

1 assessed using the likelihood ratio test.

2 A significance level of 0.05 (two-tailed) was used for all statistical tests. JMP® Pro  
3 version 11 (SAS Institute Inc., Cary, NC, USA) was used for all statistical analyses.

#### 4 **Results**

5 The overall response rate to the questionnaire in the second/third trimester was  
6 97.7% (9432/9649). Table 1 shows participants' characteristics at the first trimester,  
7 their partners' participating status, and visits to the obstetrician among responders and  
8 non-responders. The proportions of marital status, family members, medical history,  
9 exposure to secondary smoke, and job status significantly differed between responders  
10 and non-responders. The responders were more likely to be married, living with in-laws,  
11 have a history of allergic rhinitis or allergic conjunctivitis, have better physical  
12 functioning, have a high response rate from their partner, and make more visits to the  
13 obstetrician. Additionally, responders were less likely to have a history of migraines or  
14 polycystic ovary syndrome than were non-responders. Non-responders were more likely  
15 to have been exposed to secondary smoke than were responders. Participants who were  
16 employed were more likely to respond than were their counterparts. The SF-8 Physical  
17 Functioning and Body Pain scales were significantly higher for responders than for

1 non-responders.

2 Two variables showed significant associations—living with one’s mother-in-law and  
3 having allergic rhinitis—with non-response according to the bivariate logistic  
4 regression model. Table 2 shows the odds ratios for non-response according to the  
5 various demographic and clinical characteristics, partners’ participation status, and  
6 visiting obstetricians in the multivariate logistic regression analyses. Model 1 included  
7 the variables that had significant associations with non-response of MT2.

8 The odds of non-response were lower in participants who had a medical history of  
9 allergies, which is one of the priority outcomes of the JECS[1]; had a positive QOL; were  
10 living with their mother-in-law; had partners who actively participated; and had  
11 maintained contact with obstetricians. However, the odds of non-response were higher  
12 in participants who had been exposed to secondary smoke. Marital status, job site, and  
13 the SF-8 physical functioning scale did not match the model, and thus were excluded.

14 Model 2 excluded variables that did not show significance in Model 1. The odds of  
15 non-response were higher in participants who had been exposed to secondary smoke;  
16 however, the odds were lower in participants who lived with their mother-in-law, had a  
17 history of allergic rhinitis, had a positive QOL regarding body pain, had partners who  
18 participated, and visited the obstetrician.

## 1 Discussion

2 Using data collected during pregnancy, we evaluated non-response bias in  
3 approximately 10,000 pregnant women who participated in the JECS. Many factors  
4 were independently associated with response to the follow-up questionnaire. The  
5 characteristics associated with a greater probability of response included being married,  
6 living with one's mother-in-law, and where the participants worked. Having a medical  
7 history of allergic rhinitis or allergic conjunctivitis resulted in a higher probability of  
8 response. The number of partners with positive participation in the JECS and multiple  
9 visits to the obstetrician were significantly lower in non-responders than in responders.

10 The odds ratios for non-response were correlated with demographic and clinical  
11 characteristics, partners' participation status, and visiting the obstetrician in the  
12 multivariate logistic regression analysis. Specifically, the odds of non-response were  
13 lower in participants who had a medical history of allergies, which is one of the priority  
14 outcomes of the JECS; who had a positive QOL; who were living with their  
15 mother-in-law; whose partners participated; and who maintained contact with  
16 obstetricians. The odds of non-response were higher in participants who had been  
17 exposed to secondary smoke. Baron and colleagues reported that passive smoking



1 showed disparity across educational levels.[16] We could not consider the effects of  
2 education; however, the relationship between non-response and exposure to secondary  
3 smoke might be affected by participants' education.

4 One of the objectives of the JECS was to assess environmental factors that affect  
5 children's health (e.g. allergic diseases). The prevalence of allergic rhinitis in the  
6 Japanese population was 44.2% in 2006–2007 [17] and that of allergic conjunctivitis  
7 disease was 14.8% in 1993. [18] Both were higher than those reported in the current  
8 study (35.9% and 10.9%, respectively). Macera and colleagues reported that responders  
9 were individuals who had family members with certain chronic conditions in their  
10 health-related survey. [19] Leadbetter and colleagues examined the perceived risk of  
11 cancer by comparing early and late responders. They reported that the salience of the  
12 survey topic was associated with a prompt response. [20] In this survey, participants  
13 with interest in children's allergic diseases were more likely to respond; however, daily  
14 exposure to secondary smoke made non-responses more likely. In health-related  
15 surveys, participants with risky health behaviours are more likely to be  
16 non-respondents than are those who exhibit healthier behaviour. [21]

17 Etter and colleagues reported that respondents had better general health than did  
18 non-respondents.[22] Martikainen and colleagues evaluated non-response bias in

1  
2  
3  
4  
5  
6 1 analyses of social class inequalities in health.[23] They found that female  
7  
8  
9 2 non-respondents had an approximately 20–30% higher sickness absence rate per 100  
10  
11  
12 3 person-years than did respondents. Our results from the Body Pain scale showed that  
13  
14  
15 4 respondents were healthier than were non-respondents, which is consistent with these  
16  
17  
18 5 previous results. The response rate was higher among participants who lived with their  
19  
20  
21 6 mother-in-law, those who had partners who positively participated, and those who  
22  
23  
24 7 maintained contact with an obstetrician. Alessi and colleagues suggested that general  
25  
26  
27 8 practitioners' understanding of the study could influence the attitude of their patients.  
28  
29  
30 9 [24] Our results indicate that the same is true for people close to the participants. Hatta  
31  
32  
33 10 and colleagues reported that parents-in-law were perceived as the least cohesive  
34  
35  
36 11 persons among close family members in Japan. [25] Another study of postpartum  
37  
38  
39 12 depression in China reported that the underlying cultural setting of the  
40  
41  
42 13 daughter-in-law/mother-in-law relationship contributed to depression among  
43  
44  
45 14 daughters-in-law. [26] In our survey, the presence of a mother-in-law may have acted as  
46  
47  
48 15 a stressor to motivate the participants to return the questionnaires.

51 16 Further, we collected participants' job status and categorized it into three modes:  
52  
53  
54 17 homemakers or unemployed, worked from home, and employed. The response rate  
55  
56  
57 18 depended on participants' job, with a higher response rate being found among  
58  
59  
60

1 participants working from home than among those whose job location was outside of  
2 their home. In the Survey on Time Use and Leisure Activities in 2011,[27] women who  
3 worked from home (family workers) spent more time on housework and less time on  
4 self-education/training and hobbies/amusement than did those who were employed  
5 outside of their home. Associations with response to the questionnaire were also  
6 observed for job location and time spent answering the questionnaire; however, these  
7 relationships were weak.

8 Michikawa and colleagues reported that there was no difference in the distribution  
9 of maternal age at delivery between the JECS participants and the general population,  
10 further revealing that characteristics of selected infants in the JECS population  
11 (singleton birth, gestational age at birth, gender, birth weight) were similar to those of  
12 national survey data from the general population in Japan. [2] The association between  
13 non-response and the relative factors found in this study was observed in Japanese  
14 pregnant women.

15 The limitations of this study are as follows: 1) a lack of information on education  
16 level and participants' socioeconomic status, 2) a lack of information on the survey mode,  
17 and 3) a lack of information on partners' registration status. However, we know that  
18 socioeconomic status and education level are related to response status. [6,28-30]. In the

1  
2  
3  
4  
5  
6  
7 1 JECS study, however, the socioeconomic and education status data were collected with  
8  
9 2 the MT2 questionnaire, which was used to examine the non-response factor. Thus, We  
10  
11  
12 3 could not examine these factors. In particular, it seems that the investigators'  
13  
14  
15 4 interpretation of 'secondary smoke' was inconsistent with their results regarding  
16  
17  
18 5 alcohol consumption or health-related variables. These variables were related to  
19  
20  
21 6 socioeconomic and education status. In addition, several researchers have reported that  
22  
23  
24 7 response status differs according to survey mode.[31-34] In this study, we collected  
25  
26  
27 8 questionnaires by hand or by mail. Because we were unable to collect data on the mode  
28  
29  
30 9 used, we did not evaluate the effect of these distinct modes. We were also unable to  
31  
32  
33 10 collect information regarding the extent of partners' participation—any response was  
34  
35  
36 11 considered positive. Finally, we could not confirm participants' medical or obstetric  
37  
38  
39 12 history using clinical data. Relying solely on data collected by self-administered  
40  
41  
42 13 questionnaires introduces the risk of response bias.  
43  
44  
45  
46  
47

## 48 **Conclusions**

49  
50  
51 15 In conclusion, this study showed that obtaining understanding of the research  
52  
53  
54 16 objectives from people who are close to the participants was associated with a higher  
55  
56  
57 17 odds of response. To reduce the non-response rate in future follow-up surveys,  
58  
59  
60

1  
2  
3  
4  
5  
6  
7 1 additional efforts should be made to maintain contact and encourage participation  
8  
9  
10 2 among individuals who display relevant characteristics of potential non-responders.  
11  
12 3 Because the data collected from pregnant women participating in JECS were used in  
13  
14  
15 4 this study, it means the participants may have been influenced by the Japanese culture  
16  
17  
18 5 and/or their socioeconomic situation. It is necessary to consider the results obtained  
19  
20  
21 6 from other participants from different cultures or nationalities.  
22  
23  
24  
25

## 26 7 **Declarations**

### 27 28 29 8 **Data sharing statement**

30  
31  
32 9 The dataset supporting the conclusions of this article will be available after the  
33  
34  
35 10 steering committee of the JECS allows it to become available.  
36  
37

38 11 The dataset supporting the conclusions of this article is unsuitable for public  
39  
40  
41 12 deposition due to ethical restrictions and legal framework of Japan. The Act on the  
42  
43  
44 13 Protection of Personal Information (Act No. 57 of 30 May 2003; amendment on 9  
45  
46  
47 14 September 2015) prohibits publicly depositing data containing personal information.  
48  
49  
50 15 The Ethical Guidelines for Medical and Health Research Involving Human Subjects,  
51  
52  
53 16 which are enforced by the Japan Ministry of Education, Culture, Sports, Science and  
54  
55  
56 17 Technology and the Ministry of Health, Labour and Welfare, also restrict the open  
57  
58  
59 18 sharing of epidemiologic data. All inquiries about access to these data should be sent to  
60

1  
2  
3  
4  
5  
6 1 Dr Shoji F. Nakayama, JECS Programme Office, National Institute for Environmental  
7  
8  
9 2 Studies; email: jecs-en@nies.go.jp.  
10

### 11 3 **Competing interests**

12  
13  
14  
15 4 The authors declare that they have no competing interests.  
16  
17

### 18 5 **Funding**

19  
20  
21 6 The Japan Environment and Children's Study was supported by the Ministry of the  
22  
23  
24 7 Environment, Japan. The findings and conclusions of this article are solely the  
25  
26  
27 8 responsibility of the authors and do not represent the official views of the  
28  
29  
30 9 above-mentioned government.  
31  
32

### 33 10 **Authors' contributions**

34  
35  
36 11 MK designed and conducted the study, performed the statistical analyses, and wrote  
37  
38  
39 12 the manuscript. KM helped draft the manuscript. AT conducted the data collection and  
40  
41  
42 13 helped draft the manuscript. MI and TT conducted data collection and helped critically  
43  
44  
45 14 revise the manuscript. KH and HI participated in the study design and helped critically  
46  
47  
48 15 revise the manuscript. HO assisted with the statistical analyses. YA and SS helped  
49  
50  
51 16 critically revise the manuscript. All authors have read and approved the final  
52  
53  
54 17 manuscript.  
55  
56

### 57 18 **Figure legend**

58  
59  
60

1  
2  
3  
4  
5  
6  
7  
8  
9  
10  
11  
12  
13  
14  
15  
16  
17  
18  
19  
20  
21  
22  
23  
24  
25  
26  
27  
28  
29  
30  
31  
32  
33  
34  
35  
36  
37  
38  
39  
40  
41  
42  
43  
44  
45  
46  
47  
48  
49  
50  
51  
52  
53  
54  
55  
56  
57  
58  
59  
60

1 Figure 1. Participant (expecting mothers) flow

## 2 **Acknowledgements**

3 We thank all members of the JECS as of 2015: Toshihiro Kawamoto (principal  
4 investigator), Hirohisa Saito (Medical Support Center for the JECS, National Center for  
5 Child Health and Development, Tokyo, Japan), Reiko Kishi (Hokkaido Regional Center  
6 for the JECS, Hokkaido University, Sapporo, Japan), Nobuo Yaegashi (Miyagi Regional  
7 Center for the JECS, Tohoku University, Sendai, Japan), Koichi Hashimoto  
8 (Fukushima Regional Center for the JECS, Fukushima Medical University, Fukushima,  
9 Japan), Chisato Mori (Chiba Regional Center for the JECS, Chiba University, Chiba,  
10 Japan), Fumiki Hirahara (Kanagawa Regional Center for the JECS, Yokohama City  
11 University, Yokohama, Japan), Zentarō Yamagata (Koshin Regional Center for the  
12 JECS, University of Yamanashi, Chuo, Japan), Hidekuni Inadera (Toyama Regional  
13 Center for the JECS, University of Toyama, Toyama, Japan), Michihiro Kamijima  
14 (Aichi Regional Center for the JECS, Nagoya City University, Nagoya, Japan), Ikuo  
15 Konishi (Kyoto Regional Center for the JECS, Kyoto University, Kyoto, Japan),  
16 Hiroyasu Iso (Osaka Regional Center for the JECS, Osaka University, Suita, Japan),  
17 Masayuki Shima (Hyogo Regional Center for the JECS, Hyogo College of Medicine,  
18 Nishinomiya, Japan), Toshihide Ogawa (Tottori Regional Center for the JECS, Tottori

- 1 University, Yonago, Japan), Narufumi Suganuma (Kochi Regional Center for the JECS,
- 2 Kochi University, Nankoku, Japan), Koichi Kusuhara (Fukuoka Regional Center for the
- 3 JECS, University of Occupational and Environmental Health, Kitakyushu, Japan), and
- 4 Takahiko Kato (South Kyushu/Okinawa Regional Center for the JECS, Kumamoto
- 5 University, Kumamoto, Japan).



## References

1. Kawamoto T, Nitta H, Murata K, *et al.* Rationale and study design of the Japan environment and children's study (JECS). *BMC Public Health* 2014;14:25.
2. Michikawa T, Nitta H, Nakayama SF, *et al.* The Japan Environment and Children's Study (JECS): A preliminary report on selected characteristics of approximately 10 000 pregnant women recruited during the first year of the study. *J Epidemiol* 2015;25(6):452–458.
3. Christensen AI, Ekholm O, Gray L, *et al.* What is wrong with non-respondents? Alcohol-, drug- and smoking-related mortality and morbidity in a 12-year follow-up study of respondents and non-respondents in the Danish Health and Morbidity Survey. *Addiction* 2015;110(9):1505–12.
4. Schneider KL, Clark MA, Rakowski W, *et al.* Evaluating the impact of non-response bias in the Behavioral Risk Factor Surveillance System (BRFSS). *J Epidemiol Community Health* 2012;66(4):290–5.
5. Stang A. Nonresponse research—an underdeveloped field in epidemiology. *Eur J Epidemiol* 2003;18(10):929–31.
6. Pietilä AM, Rantakallio P, Laara E. Background factors predicting non-response in a health survey of northern Finnish young men. *Scand J Soc Med* 1995;23(2):129–36.
7. Jackson R, Chambless LE, Yang K, *et al.* Differences between respondents and nonrespondents in a multicenter community-based study vary by gender ethnicity. The Atherosclerosis Risk in Communities (ARIC) Study Investigators. *J Clin Epidemiol* 1996;49(12):1441–6.
8. Edwards P, Roberts I, Clarke M, *et al.* Increasing response rates to postal questionnaires: Systematic review. *BMJ* 2002;324(7347):1183.
9. Young AF, Powers JR, Bell SL. Attrition in longitudinal studies: Who do you lose? *Aust NZ J Public Health* 2006;30(4):353–61.
10. Powers J, Loxton D. The impact of attrition in an 11-year prospective longitudinal study of younger women. *Ann Epidemiol* 2010;20(4):318–21.
11. Launes J, Hokkanen L, Laasonen M, *et al.* Attrition in a 30-year follow-up of a perinatal birth risk cohort: Factors change with age. *PeerJ* 2014;2:e480.
12. Sheikh K, Mattingly S. Investigating non-response bias in mail surveys. *J Epidemiol Community Health* 1981;35(4):293–6.
13. Wolke D, Sohne B, Ohrt B, *et al.* Follow-up of preterm children: Important to document dropouts. *Lancet* 1995;345(8947):447.
14. Fukuhara S, Suzukamo Y. Manual of the SF-8 Japanese version. Kyoto, Japan:

1  
2  
3  
4  
5  
6  
7  
8  
9  
10  
11  
12  
13  
14  
15  
16  
17  
18  
19  
20  
21  
22  
23  
24  
25  
26  
27  
28  
29  
30  
31  
32  
33  
34  
35  
36  
37  
38  
39  
40  
41  
42  
43  
44  
45  
46  
47  
48  
49  
50  
51  
52  
53  
54  
55  
56  
57  
58  
59  
60

- Institute for Health Outcomes & Process Evaluation Research. 2004.
15. Furukawa TA, Kawakami N, Saitoh M, et al. The performance of the Japanese version of the K6 and K10 in the World Mental Health Survey Japan. *Int J Methods Psychiatr Res* 2008;17(3):152–8.
  16. Baron R, Mannien J, te Velde SJ, et al. Socio-demographic inequalities across a range of health status indicators and health behaviours among pregnant women in prenatal primary care: a cross-sectional study. *BMC Pregnancy Childbirth* 2015;15:261.
  17. Sakashita M, Hirota T, Harada M, et al. Prevalence of allergic rhinitis and sensitization to common aeroallergens in a Japanese population. *Int Arch Allergy Immunol* 2010;151(3):255–61.
  18. Fernandez C. Ethical issues in health research in children. *Paediatr Child Health* 2008;13(8):707–12.
  19. Macera CA, Jackson KL, Davis DR, et al. Patterns of non-response to a mail survey. *J Clin Epidemiol* 1990;43(12):1427–30.
  20. Leadbetter S, Hawkins NA, Scholl LE, et al. Recruiting women for a study on perceived risk of cancer: influence of survey topic salience and early versus late response. *Prev Chronic Dis* 2013;10:E75.
  21. Goldberg M, Chastang JF, Zins M, et al. Health problems were the strongest predictors of attrition during follow-up of the GAZEL cohort. *J Clin Epidemiol* 2006;59(11):1213–21.
  22. Etter JF, Perneger TV. Analysis of non-response bias in a mailed health survey. *J Clin Epidemiol* 1997;50(10):1123–8.
  23. Martikainen P, Laaksonen M, Piha K, et al. Does survey non-response bias the association between occupational social class and health? *Scand J Public Health* 2007;35(2):212–5.
  24. Alessi D, Pastore G, Zuccolo L, et al. Analysis of nonresponse in the assessment of health-related quality of life of childhood cancer survivors. *Eur J Cancer Prev* 2007;16(6):576–80.
  25. Hatta T, Kadobayashi S, Iwamoto T, et al. Interpersonal constructs of pregnant married women during pregnancy and postpartum period as perceptions of family members. *Percept Mot Skills* 2000;91(3 Pt 1):789–99.
  26. Gao LL, Chan SW, You L, et al. Experiences of postpartum depression among first-time mothers in mainland China. *J Adv Nurs* 2010;66(2):303–12.
  27. Statistics Bureau, Ministry of Internal Affairs. Survey on time use and leisure activities. In., 2013/4/1 edn; 2013.

- 1  
2  
3  
4  
5  
6 1 28. Helasoja V, Prattala R, Dregval L, et al. Late response and item nonresponse in the  
7 2 Finbalt Health Monitor survey. *Eur J Public Health* 2002;12(2):117–23.  
8  
9 3 29. Tolonen H, Laatikainen T, Helakorpi S, et al. Marital status, educational level and  
10 4 household income explain part of the excess mortality of survey non-respondents.  
11 5 *Eur J Epidemiol* 2010;25(2):69–76.  
12  
13 6 30. Secor-Turner M, Sieving R, Widome R, et al. Active parent consent for health  
14 7 surveys with urban middle school students: Processes and outcomes. *J School*  
15 8 *Health* 2010;80(2):73–9.  
16  
17 9 31. Bongers IMB, Van Oers JAM. Mode effects on self-reported alcohol use and problem  
18 10 drinking: Mail questionnaires and personal interviewing compared. *J Stud Alcohol*  
19 11 1998;59(3):280–5.  
20  
21 12 32. Tse A, Ching R, Ding YB, et al. A comparison of the effectiveness of mail and  
22 13 facsimile as survey media on response rate, speed and quality. *J Market Res Soc*  
23 14 1994;36(4):349–55.  
24  
25 15 33. Aquilino WS. Telephone versus face-to-face interviewing for household drug use  
26 16 surveys. *Int J Addict* 1992;27(1):71–91.  
27  
28 17 34. Picavet HSJ. National health surveys by mail or home interview: Effects on  
29 18 response. *J Epidemiol Community Health* 2001;55(6):408–13.  
30  
31 19  
32 20  
33 21  
34  
35  
36  
37  
38  
39  
40  
41  
42  
43  
44  
45  
46  
47  
48  
49  
50  
51  
52  
53  
54  
55  
56  
57  
58  
59  
60

1 Table 1. Baseline characteristics of sample

|                                                          | Responder<br>(n=9,432) | Non-responder<br>(n= 217) | p value |
|----------------------------------------------------------|------------------------|---------------------------|---------|
| Age                                                      |                        |                           | 0.205   |
| < 25                                                     | 9.1                    | 10.4                      |         |
| 25 – 29                                                  | 27.3                   | 24.2                      |         |
| 30 – 34                                                  | 35.8                   | 42.3                      |         |
| >= 35                                                    | 27.8                   | 23.1                      |         |
| Marital status                                           |                        |                           | 0.024   |
| Married                                                  | 95.8                   | 93.9                      |         |
| Unmarried                                                | 3.2                    | 3.3                       |         |
| Divorced/widowed                                         | 1.0                    | 2.8                       |         |
| Family member participants living with                   |                        |                           |         |
| None                                                     | 0.7                    | 0.9                       | 0.661*  |
| Partner                                                  | 93.0                   | 91.7                      | 0.471   |
| Children                                                 | 55.3                   | 54.8                      | 0.892   |
| Father                                                   | 7.6                    | 5.5                       | 0.298*  |
| Mother                                                   | 9.9                    | 8.8                       | 0.646*  |
| Brother / sister                                         | 4.2                    | 5.9                       | 0.218   |
| Father-in-law                                            | 9.4                    | 5.5                       | 0.045*  |
| Mother-in-law                                            | 11.6                   | 5.5                       | 0.005*  |
| Brother / sister-in-law                                  | 3.1                    | 0.9                       | 0.071*  |
| 1 <sup>st</sup> pregnancy                                | 30.5                   | 31.0                      | 0.940*  |
| Medical history                                          |                        |                           |         |
| Have allergic rhinitis                                   | 35.9                   | 26.7                      | 0.005*  |
| Have allergic conjunctivitis                             | 10.9                   | 6.4                       | 0.035*  |
| Smoking habits during early pregnancy                    |                        |                           | 0.072   |
| Never smoked                                             | 56.8                   | 50.0                      |         |
| Ex-smokers who quit before pregnancy                     | 24.2                   | 25.2                      |         |
| Ex-smokers who quit after pregnancy                      | 13.5                   | 15.9                      |         |
| Smoker                                                   | 5.5                    | 8.9                       |         |
| Exposed to secondary smoke before pregnancy <sup>a</sup> |                        |                           | < 0.001 |
| Rarely                                                   | 80.2                   | 71.0                      |         |
| Daily                                                    | 19.8                   | 29.0                      |         |
| Alcohol consumption during early pregnancy               |                        |                           | 0.006*  |

|                                                 |           |           |                    |
|-------------------------------------------------|-----------|-----------|--------------------|
| Never drinker                                   | 35.0      | 40.4      |                    |
| Ex-drinkers                                     | 55.0      | 55.4      |                    |
| Drinkers                                        | 10.0      | 4.2       |                    |
| Job site of participants                        |           |           | 0.011              |
| Housewife / unemployed                          | 42.2      | 52.2      |                    |
| Work from home                                  | 3.4       | 3.9       |                    |
| Employed                                        | 54.4      | 43.9      |                    |
| Relationship with others                        |           |           |                    |
| Visits obstetrician <sup>b</sup>                | 97.8      | 54.3      | < 0.001*           |
| Positive participation of partners <sup>c</sup> | 60.4      | 23.9      | < 0.001*           |
|                                                 | Mean, SE  | Mean, SE  | p value            |
| No. of household member                         | 3.3, 0.01 | 3.1, 0.09 | 0.094 <sup>+</sup> |
| Health Related Quality of Life (SF-8)           |           |           |                    |
| General Health                                  | 46.9, 0.1 | 46.7, 0.5 | 0.772              |
| Physical Functioning                            | 46.6, 0.1 | 45.5, 0.5 | 0.027              |
| Role Physical                                   | 43.7, 0.1 | 43.5, 0.6 | 0.756              |
| Body Pain                                       | 50.0, 0.1 | 48.7, 0.6 | 0.025              |
| Vitality                                        | 47.5, 0.1 | 47.2, 0.5 | 0.452              |
| Social Functioning                              | 44.2, 0.1 | 43.4, 0.6 | 0.203              |
| Mental Health                                   | 47.0, 0.1 | 46.2, 0.5 | 0.062              |
| Role Emotional                                  | 47.2, 0.1 | 46.5, 0.5 | 0.198              |
| Physical Component Summary                      | 45.5, 0.1 | 44.8, 0.5 | 0.203              |
| Mental Component Summary                        | 46.3, 0.1 | 45.6, 0.5 | 0.164              |
| Self-Administered mental health (K6)            | 9.6, 0.0  | 10.1, 0.3 | 0.097 <sup>+</sup> |

\*: Fisher's exact test, +: Welch's t test

a: 'Daily' defined as subjects exposed at least once a week.

b: Participants who collected the transcription sheet defined as multiple visits with obstetrician.

c: Positive participation of partner was those who answered the questionnaire.

1 Table 2. (a) Multivariate Logistic Regression Predicting the likelihood of Survey  
 2 Non-response: model 1

| Variable                                                           | OR (95% CI)       | p value |
|--------------------------------------------------------------------|-------------------|---------|
| Marital status                                                     |                   |         |
| Married                                                            | Reference         |         |
| Unmarried                                                          | 0.64 (0.23, 1.48) | 0.324   |
| Divorced/widowed                                                   | 1.22 (0.28, 3.52) | 0.750   |
| Living with mother-in-law (yes / no)                               | 0.50 (0.25, 0.90) | 0.020   |
| Job site of participants                                           |                   |         |
| Housewife or unemployed                                            | Reference         |         |
| Work from home                                                     | 1.58 (0.67, 3.26) | 0.173   |
| Employed                                                           | 0.86 (0.62, 1.19) | 0.107   |
| Medical history of allergic rhinitis (yes / no)                    | 0.62 (0.43, 0.88) | 0.007   |
| Health Related Quality of Life (Physical Functioning)              | 0.98 (0.96, 1.00) | 0.135   |
| Health Related Quality of Life (Body Pain)                         | 0.97 (0.95, 0.98) | 0.002   |
| Exposed to secondary smoke during early pregnancy (daily / rarely) | 1.48 (1.03, 2.11) | 0.034   |
| Alcohol consumption                                                |                   |         |
| Drinker during early pregnancy / never drunk                       | 0.34 (0.14, 0.71) | 0.002   |
| Drinker during early pregnancy / ex-drinkers                       | 0.45 (0.19, 0.92) | 0.027   |
| Relationship with others                                           |                   |         |
| Visits to obstetrician (yes / no)                                  | 0.02 (0.02, 0.04) | <0.001  |
| Positive participation of partners (yes / no)                      | 0.26 (0.18, 0.36) | <0.001  |

3 For this model, data of 9,298 people were used.

4 AICc: 1427.9, LOF: p=1.000

5

1 Table 2. (b) Multivariate Logistic Regression Predicting the likelihood of Survey

2 Non-response: model 2

| Variable                                                    | OR (95% CI)       | p value |
|-------------------------------------------------------------|-------------------|---------|
| Living with mother-in-law (yes / no)                        | 0.47 (0.24, 0.85) | 0.011   |
| Having history of allergic rhinitis (yes / no)              | 0.68 (0.48, 0.95) | 0.024   |
| Health Related Quality of Life (Body Pain)                  | 0.96 (0.95, 0.98) | <0.001  |
| Exposed to secondary smoke (daily / rarely)                 | 1.59 (1.12, 2.23) | 0.009   |
| Alcohol consumption (drinker / never drinker)               | 0.36 (0.16, 0.72) | 0.002   |
| Alcohol consumption (drinker / ex-drinker)                  | 0.47 (0.21, 0.92) | 0.026   |
| Visits obstetrician (yes / no)                              | 0.02 (0.02, 0.03) | <0.001  |
| Positive participation of participants' partners (yes / no) | 0.25 (0.17, 0.35) | <0.001  |

3 For this analysis, data of 9,634 people were used.

4 AICc: 1507.8, LOF: p=1.000

5

6

7

1  
2  
3  
4  
5  
6  
7  
8  
9  
10  
11  
12  
13  
14  
15  
16  
17  
18  
19  
20  
21  
22  
23  
24  
25  
26  
27  
28  
29  
30  
31  
32  
33  
34  
35  
36  
37  
38  
39  
40  
41  
42  
43  
44  
45  
46  
47  
48  
49  
50  
51  
52  
53  
54  
55  
56  
57  
58  
59  
60



Figure 1. Inclusion of subjects (expecting mothers)



## STROBE Statement—checklist of items that should be included in reports of observational studies

|                              | Item No | Recommendation                                                                                                                                                                             | The page No   |
|------------------------------|---------|--------------------------------------------------------------------------------------------------------------------------------------------------------------------------------------------|---------------|
| <b>Title and abstract</b>    | 1       | (a) Indicate the study's design with a commonly used term in the title or the abstract                                                                                                     | p. 1          |
|                              |         | (b) Provide in the abstract an informative and balanced summary of what was done and what was found                                                                                        | p. 3          |
| <b>Introduction</b>          |         |                                                                                                                                                                                            |               |
| Background/rationale         | 2       | Explain the scientific background and rationale for the investigation being reported                                                                                                       | p.6-8         |
| Objectives                   | 3       | State specific objectives, including any prespecified hypotheses                                                                                                                           | p.8<br>1.1-4  |
| <b>Methods</b>               |         |                                                                                                                                                                                            |               |
| Study design                 | 4       | Present key elements of study design early in the paper                                                                                                                                    | p.9           |
| Setting                      | 5       | Describe the setting, locations, and relevant dates, including periods of recruitment, exposure, follow-up, and data collection                                                            | p.9-<br>10    |
| Participants                 | 6       | (a) <i>Cohort study</i> —Give the eligibility criteria, and the sources and methods of selection of participants. Describe methods of follow-up                                            | p.9<br>Fig.1  |
|                              |         | <i>Case-control study</i> —Give the eligibility criteria, and the sources and methods of case ascertainment and control selection. Give the rationale for the choice of cases and controls |               |
|                              |         | <i>Cross-sectional study</i> —Give the eligibility criteria, and the sources and methods of selection of participants                                                                      |               |
|                              |         | (b) <i>Cohort study</i> —For matched studies, give matching criteria and number of exposed and unexposed                                                                                   |               |
|                              |         | <i>Case-control study</i> —For matched studies, give matching criteria and the number of controls per case                                                                                 |               |
| Variables                    | 7       | Clearly define all outcomes, exposures, predictors, potential confounders, and effect modifiers. Give diagnostic criteria, if applicable                                                   | p.9-<br>10    |
| Data sources/<br>measurement | 8*      | For each variable of interest, give sources of data and details of methods of assessment (measurement). Describe comparability of assessment methods if there is more than one group       | p.9-<br>10    |
| Bias                         | 9       | Describe any efforts to address potential sources of bias                                                                                                                                  | p.16-<br>17   |
| Study size                   | 10      | Explain how the study size was arrived at                                                                                                                                                  | Fig.1<br>p.11 |
| Quantitative variables       | 11      | Explain how quantitative variables were handled in the analyses. If applicable, describe which groupings were chosen and why                                                               | p.9-<br>10    |
| Statistical methods          | 12      | (a) Describe all statistical methods, including those used to control for confounding                                                                                                      | P10-<br>11    |
|                              |         | (b) Describe any methods used to examine subgroups and interactions                                                                                                                        |               |
|                              |         | (c) Explain how missing data were addressed                                                                                                                                                |               |
|                              |         | (d) <i>Cohort study</i> —If applicable, explain how loss to follow-up was addressed                                                                                                        |               |
|                              |         | <i>Case-control study</i> —If applicable, explain how matching of cases and                                                                                                                |               |

1  
2  
3  
4  
5  
6  
7  
8  
9  
10  
11  
12  
13  
14  
15  
16  
17  
18  
19  
20  
21  
22  
23  
24  
25  
26  
27  
28  
29  
30  
31  
32  
33  
34  
35  
36  
37  
38  
39  
40  
41  
42  
43  
44  
45  
46  
47  
48  
49  
50  
51  
52  
53  
54  
55  
56  
57  
58  
59  
60

controls was addressed  
*Cross-sectional study*—If applicable, describe analytical methods taking  
account of sampling strategy  

---

*(e)* Describe any sensitivity analyses

Continued on next page

For peer review only

**Results**

|                  |     |                                                                                                                                                                                                                                                                                                                                                                                                               |                  |
|------------------|-----|---------------------------------------------------------------------------------------------------------------------------------------------------------------------------------------------------------------------------------------------------------------------------------------------------------------------------------------------------------------------------------------------------------------|------------------|
| Participants     | 13* | (a) Report numbers of individuals at each stage of study—eg numbers potentially eligible, examined for eligibility, confirmed eligible, included in the study, completing follow-up, and analysed<br>(b) Give reasons for non-participation at each stage<br>(c) Consider use of a flow diagram                                                                                                               | p.11             |
| Descriptive data | 14* | (a) Give characteristics of study participants (eg demographic, clinical, social) and information on exposures and potential confounders<br>(b) Indicate number of participants with missing data for each variable of interest<br>(c) <i>Cohort study</i> —Summarise follow-up time (eg, average and total amount)                                                                                           | p.11<br>Tab.1    |
| Outcome data     | 15* | <i>Cohort study</i> —Report numbers of outcome events or summary measures over time<br><i>Case-control study</i> —Report numbers in each exposure category, or summary measures of exposure<br><i>Cross-sectional study</i> —Report numbers of outcome events or summary measures                                                                                                                             | p.11-12<br>Tab.2 |
| Main results     | 16  | (a) Give unadjusted estimates and, if applicable, confounder-adjusted estimates and their precision (eg, 95% confidence interval). Make clear which confounders were adjusted for and why they were included<br>(b) Report category boundaries when continuous variables were categorized<br>(c) If relevant, consider translating estimates of relative risk into absolute risk for a meaningful time period | p.12-13<br>Tab.2 |
| Other analyses   | 17  | Report other analyses done—eg analyses of subgroups and interactions, and sensitivity analyses                                                                                                                                                                                                                                                                                                                |                  |

**Discussion**

|                  |    |                                                                                                                                                                            |         |
|------------------|----|----------------------------------------------------------------------------------------------------------------------------------------------------------------------------|---------|
| Key results      | 18 | Summarise key results with reference to study objectives                                                                                                                   | p.13    |
| Limitations      | 19 | Discuss limitations of the study, taking into account sources of potential bias or imprecision. Discuss both direction and magnitude of any potential bias                 | p.16-17 |
| Interpretation   | 20 | Give a cautious overall interpretation of results considering objectives, limitations, multiplicity of analyses, results from similar studies, and other relevant evidence | p.14-17 |
| Generalisability | 21 | Discuss the generalisability (external validity) of the study results                                                                                                      | p.17    |

**Other information**

|         |    |                                                                                                                                                               |         |
|---------|----|---------------------------------------------------------------------------------------------------------------------------------------------------------------|---------|
| Funding | 22 | Give the source of funding and the role of the funders for the present study and, if applicable, for the original study on which the present article is based | p.8, 18 |
|---------|----|---------------------------------------------------------------------------------------------------------------------------------------------------------------|---------|

\*Give information separately for cases and controls in case-control studies and, if applicable, for exposed and unexposed groups in cohort and cross-sectional studies.

**Note:** An Explanation and Elaboration article discusses each checklist item and gives methodological background and published examples of transparent reporting. The STROBE checklist is best used in conjunction with this article (freely available on the Web sites of PLoS Medicine at <http://www.plosmedicine.org/>, Annals of Internal Medicine at <http://www.annals.org/>, and Epidemiology at <http://www.epidem.com/>). Information on the STROBE Initiative is available at [www.strobe-statement.org](http://www.strobe-statement.org).
